# Supplementary material for: Large-scale cell-type-specific imaging of protein synthesis in a vertebrate brain
Source: eLife. 2020 Feb 24;9:e50564. doi: 10.7554/eLife.50564 (PMC7048392; doi:10.7554/eLife.50564)
Supplement: Figure 2—source data 1. [file elife-50564-fig2-data1.xlsx]

## Sheet: Figure2H Habenula
ANL- (CONTROL)						ANL +									ANL- (CONTROL)						ANL +
1		2		3		1		2		3		4			2196.82	86.0208	1711.68	89.7084	1887.35	71.4335	2178.07	2829.37	2298.94	2444.17	1001.82	998.807	1982.4	2671.24
Intensity Mean CFP	Intensity Mean ANL	Intensity Mean CFP	Intensity Mean ANL	Intensity Mean CFP	Intensity Mean ANL	Intensity Mean CFP	Intensity Mean ANL	Intensity Mean CFP	Intensity Mean ANL	Intensity Mean CFP	Intensity Mean ANL	Intensity Mean CFP	Intensity Mean ANL		96.0097	2.27156	80.5396	2.94937	91.3942	2.05307	133.059	120.685	102.462	56.9123	66.1152	22.7261	98.5572	92.4564
1799.91	78.1384	1744.59	117.893	1695.3	66.7231	2477.4	4033.15	1902.2	1332.61	1378.73	1102.29	741.162	2210.74
1610.56	109.167	1243.56	108.53	1502.97	65.9167	3247.78	3679.49	2006.24	2216.6	1595.63	1241.92	488.678	1489.68
1815.94	93	1509.7	99	1689.96	73.8424	3013.24	3347.02	2246.78	2382	1326	1133.26	662.737	1804.18
1419.33	118.123	1688.14	87.9425	2130.32	68.5535	3368.38	3934.64	1935.05	2806.96	1547.53	899.874	389.443	994.672		2196.82	1711.68	1887.35		2178.07	2298.94	1001.82	1982.4	CFP TTEST p	0.424091
1774.72	103.987	1629.35	106.536	2167.25	69.8951	3250	3471.77	1465.16	2094.97	1191.18	1046.15	2510.02	3128.39		86.0208	89.7084	71.4335		2829.37	2444.17	998.807	2671.24	ANL TTEST p	0.00717173
2101.74	107.909	1885.82	87.6641	2039.53	68.7911	3299.53	3667.68	2375.51	2016.01	1592.44	861.129	2938.33	3674.61
2089.11	95.1629	1641.25	89.3767	1964.46	76.3726	2715.48	3831.25	1754.36	2219.22	1279.81	1172.37	3331.47	3659.08
2238	94.2047	1243.83	83.1941	2633.74	76.1432	2378.61	4023.44	1129.77	2140.24	1756.34	1185.92	2582.37	2904.25
1963.3	89.0377	1815.89	80.7653	1730.09	75.9922	2341.69	3724.09	3060.51	2533.32	1560.49	1106.33	2043.4	2736.36
2747.37	78.7059	1440.84	74.9538	1918.97	78.4974	2818.44	3223.3	1898.23	1805.48	1505.88	1033.14	2624.81	2733.57
1333.86	61.3814	1913.76	85.045	2228.62	70.8251	3570.79	3247.19	2384.09	1874.9	1602.1	870.58	2527.31	3235.5
2090.91	79.229	998.051	108.051	2231.96	92.5844	3668.54	3572.1	1956.89	2124.76	1415.25	815.547	1998.73	3259.08
1866.52	84.2879	1965.03	73.1299	2234.98	77.9366	2165.98	3851.16	2156.86	2847.79	572.953	633.484	1852.31	2739.54
2154.14	79.58	940.827	68.8961	1874.45	79.8242	3325.67	3055.63	2814.15	2210.1	750.81	792.086	2156.21	2716.71
1918.98	78.2115	2286.28	123.067	2295.31	71.8141	3095.11	2640.11	2326.13	2090.19	802.152	1058.68	1884.26	2881.81
954.206	73.75	1494.07	87.8748	1019.55	85.757	3416.51	3605.97	1314.92	2604.67	589.741	1041.75	2073.91	1632.35
1656.85	68.3647	1518.79	112.612	1605.23	60.0116	3358.99	3717.64	2980.3	2472.22	691.738	836.465	2445.37	2907.14
1334.17	58.2637	1331.58	74.6854	1738.84	60.8179	3107.38	3339.32	1055.93	2402.07	727.804	1036.47	3264.36	2259.48
1445.32	64.0294	1381.45	96.6487	1297.95	70.2694	2722.94	3967.36	2468.89	2453.67	662.659	1035.79	2426.76	1576.23
3263.87	90.9333	1373.85	85.54	1123.8	83.0187	3194.22	3831.2	1406.09	3205.88	735.479	1070.47	3034.72	2094.15
3310.39	84.1119	904.055	120.834	1180.4	85.619	3108.54	3133.2	2900.49	2483.05	714.121	1021.64	2156.22	1584.52
2107.94	93.1331	1063.69	63.5531	1742.03	59.3838	3133.99	3469.17	1611.18	2701.94	677.366	1095.45	2808.87	3010.33
2139.38	82.9706	1376.09	84.1413	1978.55	78.4726	3460.14	4029.77	2161.71	1994.46	827.246	975.077	3283.83	2021.36
2742.15	104.694	1530.98	64.9089	3625.76	33.3277	3759.95	3111.71	3510.97	2681.18	1009.82	1397.79	2060.35	3337.07
3278.37	100.737	1154.83	48.4978	1674.5	61.9433	3474.79	3367.83	2556.09	2595.87	675.3	1034.14	1877.76	2543.22
2925.12	95.7113	2144.15	120.66	1448.24	52.9	3369.77	3993.73	1601.94	3228.8	783.653	1179.4	1884.99	2420.76
3173.45	79.3143	1190.45	65.0638	1732.22	73.956	3117.51	3218.61	1214.15	1631.83	1046.03	952.462	2087.28	3311.72
3166.94	90.4783	2037.78	57.0942	2238.25	75.3482	3218.38	3832.08	3304.35	3102.18	1072.64	886.725	2545.7	1735.27
3209.24	89.5284	1333.32	118.414	2087.74	71.9524	3554.41	3957.52	3042.84	2807.43	332.744	981.55	2210.39	3928.72
3012.22	97.3041	1005.38	98.0719	1789.54	76.5158	3232.65	3966	2224.36	2304.21	229.839	934.171	2147.29	3055.34
2669.82	75.7773	1752.28	131.873			876.453	2005.97	1800.95	2636.15	762.865	947.168	1857.52	3627.59
2937.11	86.2635	1497.67	122.472			977.913	1335.71	2991.35	2495.47	450.678	1067.19	1607.05	3770.35
2258.05	74.0935	2392.06	85.7798			1379	3060.34	3091.68	2881.23	2244.01	1362.76	1694.72	2471.19
1601.08	64.0706	2332.64	80.811			700.581	1700.1	3046.92	2995.36	1924.25	936.241	1464.56	3056.6
1152.01	106.117	2064.34	118.483			1221.45	1914.11	2387.96	2378.92	464.981	587.56	1862.33	3200.26
2851.18	130.656	2182.48	90.3819			1329.45	3852.89	3544.63	2993.19	503.11	994.188	1446.95	3185.44
2230.49	83.4868	1967.11	101.869			1234.09	1690.29	3101.6	2575.6	989.092	941.24	2009.76	3951.84
2314.41	85.1848	1652.33	105.644			1129.66	3093.05	2529.25	3160.33	777.237	914.333	1282.31	3202.97
1571.95	66.7405	2305.05	89.3438			1656.03	2726.16	2809.84	2872.65	350.62	669.422	1924.71	3489.2
2001.81	68.8571	2437.65	81.3748			1779.52	2035.58	1792.34	2917.27	317.704	805.191	2863.36	2325.21
2329.44	70.8085	1981.6	98.2103			531.443	1200.71	1945.41	1850.93	669.604	1012.61	3334.14	2818.83
2493	84.2842	1856.64	97.9875			2043.17	2714.73	2288.49	2921	1344.17	1174.26	3440.49	3249.88
1697.77	86.8919	2684.42	65.6712			2168.1	2221.63	2775.83	2662.44	1254.63	1040.22	2200.44	2793.81
2720.29	78	2884.96	78.2077			469.059	1775.26	2016.2	3328.75	454.614	1105.11	2852.24	2914.82
1384.7	86.2557	2241.59	69.2122			604.484	1557.95	2813.21	2345.47	881.152	979.067	1553.21	2302.82
		2513.8	59.321			1966.44	3337.56	2568.56	3066.81	977.493	808.913	2073.82	2557.48
		2642.5	71.9886			3097.62	3707.22	2869.09	2242.33	1355.41	1154.5	2925.51	3451.43
		2754.26	76.9459			440.961	1423.65	1979.78	2481.71	1542.39	1049.52	2714.98	2881
		2946.99	71.6444			767.311	1033.67	2354.39	2312.1	1527.26	942.478	2117.26	3278.38
		2238.52	72.0241			817.446	1154.14	3299.23	2326.81	646.224	1016.27	2303.97	3399.45
		2666.96	66.3252			819.703	1020.66	2784.57	2171.57			2748.13	3059.6
		961.027	66.4751			1573.97	2795.45	3580.25	2060.77			2654.85	2895.99
		555.187	93.6937			1974.69	3117.13	2885.53	1269.99			1851.66	3522.52
		716.092	167.963			1715.33	2837.49	3791.5	2263.62			1566.72	2783.3
		664.006	101.539			1435.3	1944.62	3540.55	1980.86			1842.69	2498.74
		917.13	68.4155			3026.99	3180.36	4007.1	2532.82			790.52	1764.6
		968.863	87.0788			2358.09	1641.16	696.387	2394.18			1274.42	1997.57
						644.583	1421.08	642.811	2182.75			337.167	1514.03
						951.423	2010.13	1115.55	2190.32			1007.6	1910.89
						1898.36	2504.65	907.599	2239.73			2040.03	3727.31
						787.761	2270.09	766.435	1821.6			1084.92	1246.46
						2453.64	1743.61	1442.39	2971			1271.74	2027.96
						1880.49	3719.13	1899.62	3094.06			292	1726.4
						354.602	1227.05					1132.91	2497.94
						542.59	1092.59					392.317	942.992

## Sheet: Figure 2 I
ANL- (CONTROL)						ANL +							ANL- (CONTROL)						ANL +
1		2		3		1		2		3		average	810.22	146.861	788.023	115.76	611.846	87.584	769.259	1334.32	688.969	1149.06	510.031	918.93
Intensity Mean CFP	Intensity Mean ANL	Intensity Mean CFP	Intensity Mean ANL	Intensity Mean CFP	Intensity Mean ANL	Intensity Mean CFP	Intensity Mean ANL	Intensity Mean CFP	Intensity Mean ANL	Intensity Mean CFP	Intensity Mean ANL	SEM	23.259	2.71746	13.6339	1.68347	14.1814	1.36318	16.0676	16.0502	11.3309	12.0595	9.20184	11.3698
154.974	93.0965	1830.25	305.047	336.352	81.1296	1405.72	806.98	512.415	732.863	316.185	284.348
168.217	77.1589	2079.04	135.582	422.434	52.3213	619.464	761.837	543.387	680.338	237.489	264.979
141.43	94.09	1945.09	132.435	420.45	104.908	847.112	991.255	558.035	1036.82	305.075	295.602
200.321	97.5773	1781.21	196.598	516.755	94.5851	667.948	473.537	388.63	425.102	265.185	1928.67
170.746	98.1097	2127.61	182.865	543.613	115.187	496.84	508.302	384.814	424.604	306.337	569.924
147.411	84.8404	2093.28	181.303	401.185	90.5432	566.076	787.767	388.533	329.23	703.936	964.288
140.159	72.2814	2208.7	211.571	924.852	117.985	643.142	1134.89	638.703	602.194	330.115	444.236					ANL- (control)	ANL+
135.335	61.4341	1544.16	125.204	680.607	153.25	393.052	637.214	819.598	1022.23	483.72	822.747				CFP	736.696	656.087		62.7533	76.6175
3288.93	104.766	1361.33	164.078	769.141	147.587	781.934	1164.28	687.366	607.302	295.998	441.364				ANL	116.735	1134.1		17.1188	120.146
439.373	285.157	2051.53	190.567	1340.63	255.598	854.257	1105.64	680.389	792.476	346.625	460.707
566.803	362.354	1586.2	242.165	719.033	149.518	982.538	660.862	606.006	691.558	282.918	380.983
605.435	169.689	2274.33	225.2	1403.19	198.199	1284.92	1021.49	609.454	774.299	503.069	539.674		810.22	788.023	611.846		769.259	688.969	510.031	CFP TTEST p	0.231506
698.069	139.108	2182.92	359.863	789.901	112.192	871.208	1511.14	723.042	787.47	457.421	514.165		146.861	115.76	87.584		1334.32	1149.06	918.93	ANL TTEST p	0.00617629
1008.49	219.119	2293.12	314.711	936.276	179.99	564.33	628.951	364.203	895.854	736.193	535.93
1013.72	235.853	2073.2	363.263	1093.25	193.674	556.887	663.283	425.085	580.988	379.67	498.209
843.87	189.878	2285.77	410.982	1046.82	183.619	657.63	754.331	357.415	705.921	332.506	385.559
582.036	178.153	640.855	58.6487	632.502	149.742	1110.36	3182.35	454.73	765.677	487.578	382.06
662.682	150.867	1205.16	69.9455	1149.68	184.519	766.874	953.727	509.192	520.376	388.038	410.304
479.265	138.345	1560.76	160.009	1355.93	148.853	1304.99	1236.56	538.878	723.19	698.104	846.339
469.752	141.791	532.819	269.719	684.606	174.293	746.006	970.679	317.086	569.852	701.873	1115.05
625.526	330.147	1207.39	162.491	986.867	160.864	911.331	1025.93	329.086	322.318	733.826	747.763
703.248	407.653	1206.65	150.438	1192.7	200.199	838.919	1120.66	347.156	384.188	697.484	923.755
596.14	430.043	848.801	149.582	600.809	128.615	542.406	645.196	507.29	907.042	462.965	950.132
748.688	437.562	809.069	118.2	1076.1	191.855	758.372	657.295	632.793	456.667	435.086	839.689
967.319	235.684	870.286	147.498	632.823	163.087	662.504	787.423	532.006	404.121	626.775	1108.12
1301.41	182.334	3129.26	309.377	425.891	134.158	446.343	715.993	476.143	412.299	681.44	777.702
828.045	166.223	2113.01	240.063	393.515	133.644	448.513	814.768	427.168	612.031	434.822	970.305
951.345	166.863	1574.11	205.531	614.232	150.357	681.481	2679.65	440.767	645.483	350.669	455.906
838.131	140.825	1789.53	218.188	516.782	140.723	857.456	2618.61	417.054	1023.92	527.215	1048.3
1071	117.572	1118.05	145.598	721.607	145.918	686.242	1778.77	423.059	614.126	491.342	556.409
1243.32	165.3	1256.76	174.611	573.927	140.378	659.231	1307.73	387.391	456.709	547.155	504.59
1039.93	170.488	1201.12	155.118	720.042	219.5	466.885	680.291	465.847	750.331	560.016	693.281
717.263	313.031	784.651	112.564	1557.4	281.043	507.198	680.955	427.409	597.912	422.288	639.952
815.595	245.162	575.428	72.2543	1722.01	270.506	468.447	713.549	491.472	650.729	256.901	635.658
1088.88	202.988	766.262	78.1647	1699.58	240.793	607.619	671.592	707.163	531.9	279.801	1022.91
1127.16	193.718	947.627	87.9551	1425.34	213.256	532.363	1049.7	706.251	1099.99	362.933	832.042
772.802	260.307	361.365	225.354	691.146	184.636	562.781	1712.08	539.162	612.753	711.813	1142.23
1237.55	215.761	648.027	96.4818	725.667	164.333	518.162	743.52	1031.04	890.548	443.437	922.249
915.964	185.544	884.56	133.538	458.573	152.227	738.273	656.36	679.821	782.729	618.922	814.063
774.822	268.239	1194.34	138.519	447.145	170.073	569.313	639.019	417.192	468.285	494.715	895.066
1093.11	177.093	917.783	261.215	533.288	184.959	570.306	570.522	375.627	551.172	297.351	712.979
475.778	186.231	1565.58	419.221	410.636	115.527	487.87	665.21	688.315	1521.68	368.644	481.436
483.936	138.167	748.393	210.432	433.952	119.262	607.205	703.757	830.063	1551.42	404.044	712.697
943.524	130.504	891.84	265.344	467.378	107.665	749.331	742.62	598.513	1027.72	367.265	765.204
2920.43	202.712	1729.66	413.91	394.602	98.2805	611.185	628.408	698.15	1052.53	554.838	432.425
3091.35	208.983	1061.83	311.079	379.399	84.4835	630.836	589.493	1332.21	854.124	621.282	674.368
2008.46	212.967	1181.86	329.826	341.682	57.0802	502.489	677.935	564.915	998.03	294.51	402.355
982.313	149.069	934.811	225.117	452.744	117.371	581.222	587.083	632.853	607.348	297.455	472.444
1529.08	196.251	577.246	150.768	406.11	117.911	388.149	952.577	354.574	619.647	577.065	515.975
854.5	158.093	558.38	123.873	989.789	146.656	418.48	479.74	493.69	836.759	503.17	545.517
1204.51	181.485	606.678	105.194	776.417	123.7	396.529	680.075	593.062	935.23	565.2	575.552
743.495	91.3033	606.228	159.278	493.43	79.9364	467.073	612.965	365.165	1063.19	453.344	1135.7
567.568	94.6481	527.35	92.9343	906.881	127.596	680.315	737.098	466.586	713.015	347.601	940.117
814.886	145.574	683.061	162.307	520.24	86.9211	789.603	901.022	611.441	605.141	444.073	650.358
739.625	147.365	434.868	234.925	697.867	98.9987	624.082	584.546	587.398	521.834	394.733	1515.48
879.825	132.658	502.202	198.829	436.844	77.4203	805.227	663.662	489.221	929.686	339.94	808.353
841.712	141.801	520.811	54.2378	645.822	90.7222	650.232	478.9	481.923	492.735	524.016	828.568
741.062	147.883	603.276	57.9676	701.213	90.4737	498.073	3019.67	608.521	620.094	685.6	789.896
933.527	123.758	684.328	54	601.037	107.431	631.859	1748.62	371.141	455.535	478.026	744.781
541.306	101.754	452.575	307.749	629.099	91.4846	575.98	1356.24	382.263	681.756	544.019	754.414
753.131	110.075	861.467	264.863	875.759	189.206	959.837	1944.4	367.166	832.129	599.531	931.806
2443.55	161.563	907.115	150.048	810.968	133.94	457.029	1425.48	592.657	474.439	425.986	802.086
1208.22	176.792	683.856	92.0189	822.061	124.753	544.2	830.638	403.255	337.478	404.168	877.858
1010.47	129.031	815.614	93.0901	684.43	124.986	567.337	800.568	507.024	451.239	332.973	407.867
998.47	151.322	1552.83	194.328	463.224	98.5234	550.409	822.484	387.944	772.661	355.402	445.037
642.264	85.9692	1239.83	138.562	608.335	125.823	692.081	1067.01	493.707	428.247	241.327	420.067
596.841	80.83	1570.42	179.523	489.15	121.234	1671.64	1144.49	391.03	567.077	336.146	601.799
848.441	96.2522	1805.52	225.376	1577.19	190.726	1622.48	1324.35	375.533	455.114	582.534	933.804
452.484	90.5895	1205.32	181.577	636.939	149.338	711.448	653.284	473.72	617.555	507.045	870.434
1133.6	124.264	1596.9	219.638	536.017	115.275	623.777	1414.96	617.309	660.414	498.28	1032.33
644.327	107.813	1124.47	229.186	821.37	134.767	1031.51	1945.75	455.413	501.851	656.103	763.228
801.6	113.825	2100.9	410.004	644.038	119.796	1796.4	1805.59	520.857	544.584	533.786	931.244
576.457	108.934	3020.59	400.07	802.591	134.181	1012.83	2300.91	511.777	655.604	478.86	741.537
644.412	115.449	2773.99	292.605	524.534	107.924	1272.99	1724.08	426.353	886.729	375.966	1026.1
516.761	110.459	2439.53	271.779	803.6	154.555	1163.46	2153	415.036	626.282	473.621	845.522
613.98	134.609	1079.4	211.385	775.419	109.919	1152.57	1257.06	382.459	470.764	594.779	774.566
1247.38	156.01	968.863	189.724	646.795	138.314	1084.78	1246.19	418.439	358.231	275.048	990.472
1380.48	162.941	887.174	232.466	753.702	115.446	1745.99	2024.99	564.104	361.161	384.75	565.472
1147.25	159.869	863.572	187.083	554.422	126.093	1366.42	1604.56	418.625	411.473	451.384	802.159
1104.56	163.849	946.359	218.424	504.852	177.717	1615.98	1146.26	492.889	430.155	579.483	927.966
526.719	101.277	766.132	155.244	818.292	181.073	490.219	671.57	1737.46	2016.62	478.821	824.717
778.898	191.241	959.578	114.948	487.164	103.519	968.959	709.044	2145.03	1408.98	723.37	554.42
523.483	86.5074	1563.54	182.625	570.443	136.309	517.603	722.341	514.195	981.713	469.926	947.561
848.38	109.688	940.227	126.873	440.115	113.128	607.288	942.269	891.503	1346.15	713.646	485.665
881.7	134.062	771.07	110.603	525.493	106.779	809.722	1578.04	1177.98	1448.96	318.883	377.771
1904.73	204.439	870.77	132.144	549.689	101.961	623.708	1084.24	1337.2	1096.45	407.538	931.06
2043.56	205.262	788.353	121.513	330.488	114.436	583.153	824.469	543.32	613.699	248.467	373.166
1371.76	160.433	688.807	108.532	775	178.978	1643.68	2919.54	1203.85	1438.83	303.389	1137.93
1052.61	203.723	745.493	131.561	958.961	186.514	1324.62	1941.81	827.649	1293.05	313.608	637.493
913.113	149.715	826.269	158.08	829.57	207.839	2506.44	1864.22	1195.95	1407.22	460.47	1107.55
679.167	130.261	703.913	127.175	776.812	213.95	1273.41	1837.3	496.256	626.182	438.446	1123.3
1004.7	157.06	725.317	129.133	860.738	190.573	1329.94	1466.29	513.265	1221.78	748.843	988.583
784.417	139.309	710.802	125.806	1076.01	185.907	1401.69	1925.05	546.119	1324.84	668.029	966.832
618.576	127.684	540.601	211.367	795.923	199.333	3130.62	1537.71	750.7	1193.76	639.164	871.897
582.723	138.373	900.657	195.509	901.061	197.272	1394.09	854.799	518.463	843.515	594.604	905.153
817.892	147.505	536.437	200.927	962.454	184.529	1035.96	1628.8	442.474	653.599	379.089	411.75
791.276	164.313	951.922	117.589	929.553	238.053	632.785	1345.65	469.931	575.521	418.057	1343.52
917.755	155.936	2069.98	120.165	668.634	177.642	687.598	835.791	482.972	541.981	394.395	1002.16
636.368	129.113	898.312	128.743	1003.12	124.186	907.719	1489.52	499.14	1282.71	610.336	741.921
993.298	175.417	606.332	85.6726	1427.13	228.213	639.975	873.165	896.384	1404.53	405.953	976.307
787.909	168.264	617.522	131.064	383.797	110.892	647.091	824.722	701.758	2201.77	568.614	1178.7
684.795	128.344	908.054	164.543	458.562	138.611	795.977	1575	845.783	486.946	776.695	1443.36
801.132	153.843	599.346	102.903	652.684	180.768	537.843	946.661	861.293	1163.57	526.389	1274.61
1178	178.813	814.829	119.477	667.204	122.815	663.967	2155.59	373.571	605.821	490.696	1185.13
1572.11	185.447	776.432	189.046	576.575	127.067	799.661	885.558	559.413	784.082	493.446	1100.17
875.195	178.774	674.477	211.465	660.228	163.086	512.228	1706.42	450.618	690.261	514.914	1816.11
977.962	140.32	880.132	207.476	601.383	170.883	646.725	1000.19	473.444	624.304	568.765	1008.93
854.3	178.244	664.833	178.316	589.704	151.272	519.95	1172.42	462.096	495.715	545.595	678.494
763.78	140.727	613.718	219.132	565.129	165.092	703.245	1349.88	503.132	480.577	474.144	1214.28
893.876	144.145	772.119	199.423	493.14	124.414	781.575	1358.34	459.264	459.185	554.994	701.031
775.007	177.8	600.339	199.146	635.988	155.98	1521.08	1996.26	267.943	1072.73	622.097	886.163
621.06	214.251	600.987	213.339	316.377	81.5816	2433.22	2245.55	571.361	565.812	743.007	1429.75
803.199	187.701	618.609	114.166	378.812	94.85	1847.55	2822.85	470.899	571.535	622.089	988.712
677.027	180.226	1486.72	214.424	496.511	246.8	1804.68	2340.61	504.939	517.048	560.384	931.915
672.591	187.913	1929.37	150.501	567.695	262.571	1751.49	1766.15	474.55	531	592.274	1899.16
653.909	140.888	1007.44	223.363	713.126	253.193	1646.41	2407.37	518.05	569.361	468.649	711.364
585.607	164.468	1539.28	166.912	646.957	130.854	1605.65	1662.24	326.639	1043.16	615.664	668.272
722.437	178.427	1023.29	204.315	399.636	113.942	1242.68	2514.5	347.208	1117.49	497.207	744.815
585.318	166.106	1206.08	130.763	410.663	117.261	1407.62	2563.39	696.953	1905.59	412.001	687.857
652.382	141.732	733.241	122.338	402.636	82.3612	966.61	1792.94	452.255	995.372	446.984	547.503
630.091	130.824	729.449	111.337	430.38	95.7165	1489.89	1983.92	511.298	807.197	435.679	1694.73
579.428	160.338	807.254	103.067	346.052	7.66234	1137.96	931.711	512.83	861.938	342.108	472.623
546.33	154.917	712.753	109.36	496.739	162.085	532.375	642.055	707.402	1063.15	338.603	878.028
516.611	140.978	786.309	112.204	403.519	130.097	683.464	3016.84	713.658	1299.42	430.599	1005.46
654.308	141.958	1425.67	189.981	428.452	133.152	863.312	3787.27	1424.38	1254.25	267.9	503.834
742.9	155.964	988.812	211.653	401.747	131.893	746.514	3369.46	1021.21	1044.81	393.963	698.497
662.554	156.281	1011.89	169.43	302.947	106.143	714.98	513.293	397.18	946.125	364.621	1137.75
1812.75	163.361	596.166	160.134	341.92	123.322	793.216	2454.46	868.348	860.663	349.743	782.814
1607.12	174.419	610.386	142.389	287.574	83.0219	573.341	1303.08	650.357	598.277	336.18	470.027
1215.17	171.383	816.458	141.72	1115.13	141.792	638.518	2521.13	370	444.265	532.581	718.961
1782.18	184.872	1086.15	153.052	1155.63	169.745	656.914	2593.31	1351.31	965.298	383.693	612.256
1731.71	183.413	724.438	182.937	656.446	116.323	711.226	2640.64	421.686	582.62	441.957	728.321
2150.68	180.603	918.717	158.836	747.832	142.746	720.636	2630.83	650.02	404.828	457.261	871.769
1361.68	164.967	488.706	238.021	959.479	146.483	719.922	2175.67	676.675	561.225	439.477	1344.13
1110.92	159.988	439.844	170.432	1193.36	147.049	662.652	2208.42	547.711	613.339	426.275	724.531
1774.19	167.115	662.744	98.5057	845.306	139.601	1292.43	1380.9	506.626	716.32	487.874	1048.49
1066.82	171.978	749.516	112.27	1520.51	158.798	669.867	1344.62	276.163	947.228	574.972	1428.75
1154.48	137.926	795.858	104.818	602.982	119.491	604.061	3115.34	385.036	670.438	423.85	1545.15
1108.21	155.545	751.018	113.021	1450.26	153.776	749.901	1891.39	748.988	1809.08	457.652	1054.34
905.278	154.805	946.068	120.077	634.411	108.024	544.526	1346.61	478.477	1346.46	667.623	1634.11
552.035	107.873	402.147	114.287	654.289	112.918	622.659	2857.96	634.736	1668.11	486.536	954.49
2245.34	179.064	787.099	112.855	552.445	133.503	597.14	1122.43	1345.1	1247.94	553.42	693.129
1134.66	204.595	511.657	106.534	524.297	107.416	517.663	1692.25	1301.27	873.17	463.381	1078.66
1863.99	194.988	565.301	82.7594	659.717	104.408	513.894	656.055	580.586	1247.65	423.164	713.285
1444.19	177.196	860.395	93.1405	569.349	107.888	537.242	1014.69	464.043	639.065	489.298	734.723
766.578	141.033	794.034	90.1789	785.916	148.769	524.333	781.9	483.771	959.292	515.898	720.771
425.191	90.9779	687.655	94.6996	613.786	143.587	542.036	863.868	454.917	643.248	250.692	784.972
488.301	94.4481	559.422	66.0784	762.811	137.106	513.905	1529.09	397.54	749.597	440.061	860.79
508.023	106.932	472.054	73.0726	2410.53	204.401	1071.57	1041.21	383.914	635.316	607.53	869.529
533.91	111.981	567.47	70.9714	806.973	151.315	651.662	916.192	476.278	576.25	606.745	742.76
2505.24	174.048	705.03	155.745	1341.63	129.561	554.721	937.609	482.547	640.401	409.549	698.518
1041.39	182.88	908.444	108.152	1669.43	178.079	610.578	1228.53	479.178	923.945	680.192	704.673
1087.48	165.535	922.401	132.514	459.282	73.535	3173.05	3861.18	491.44	788.53	472.648	614.561
865.587	207.422	641.148	112.605	417.694	85.7097	2592.46	3077.71	474.064	702.124	348.309	610.425
684.954	176.723	748.086	106.376	527.655	89.3789	1994.48	3659.17	519.395	488.913	648.256	1320.9
560.905	155.603	957.577	115.434	484.467	91.1938	2267.31	1973.26	1850.52	862.156	462.392	675.384
511.583	150.677	850.656	109.95	363.289	82.1036	1553.27	1884.57	749.58	1162.98	487.693	659.082
1504.71	144.243	710.927	89.3511	284.36	63.9526	1646.64	2284.71	1085.84	1374.83	668.535	1413.22
677.029	97.4785	879.966	116.936	657.525	84.6978	1804.36	1599.28	1634.07	1654.52	460.494	890.619
659.102	112.075	826.308	120.51	843.49	152.837	2075.83	1684.93	1329.25	1232.42	662.26	1226.61
713.629	115.22	715.59	100.262	1321.85	151.304	1220.86	1229.91	381.125	642.603	674.884	1082.8
869.222	136.625	1433.06	103.417	1001.1	158.08	682.338	881.115	384.401	469.648	481.595	1052.38
1279.65	117.314	1129.76	106.381	1352.1	158.941	1995.19	1357.67	577.986	805.818	472.102	1032.49
764.815	107.458	682.128	114.327	585.297	153.552	1197.76	762.272	372.094	943.695	597.953	1051.94
476.023	114.223	1910.19	154.063	624.629	152.231	661.195	715.511	331.385	813.675	598.259	870.757
709.538	112.268	519.942	75.471	595.355	141.993	583.577	616.149	457.181	782.394	313.913	717.958
534.104	115.195	607.404	27.8997	552.837	122.053	923.143	563.856	499.046	1184.27	325.67	474.308
533.446	130.565	2124.71	116.995	539.64	122.632	461.678	828.385	1360.73	1280.91	266.109	1450.08
735.927	121.012	1286.94	156.357	690.915	134.285	658.937	727.472	2665.79	3827.16	247.493	1031.94
934.067	122.916	2367.86	148.867	631.354	125.192	761.216	1015.63	2252.02	1943.05	598.011	1170.69
636.772	118.834	2473.89	105.114	379.852	107.401	577.912	1018.39	796.491	2142.24	554.656	932.229
836.866	124.504	1451.83	87.5458	474.168	108.273	854.118	982.883	1034.2	2617.4	627.621	1076.48
963.041	118.535	749.965	135.602	737.249	106.179	550.625	1065.21	1068.92	1317.22	780.576	1329.3
869.961	125.524	1587.6	179.984	426.976	110.049	606.908	1362.77	716.512	1176.23	620.322	1554.46
1022.49	121.195	1405.12	88.8642	340.911	114.63	808.876	1676.78	365.29	894.543	594.102	1011.57
996.135	114.183	997.765	155.941	377.287	85.0478	566.45	1000.67	568.103	507.253	357.387	304.706
782.437	99.522	1289.67	83.7136	685.5	124.466	588.856	2727.63	548.27	694.478	507.933	979.433
617.586	159.719	1248.06	124.661	735.805	181.983	1312.99	3301.87	1563.08	2348.69	483.856	963.107
708.931	123.718	1524.04	89.0887	1015.18	172.565	1360.91	3269.42	732.371	1608.21	444.496	1129.06
959.792	113.183	2323.2	156.375	830.738	181.697	3226.46	4089.5	653.004	2024.36	759.492	940.968
533.512	109.915	669.949	33.6622	687.649	139.794	1530.76	2070.76	463.553	963.653	478.206	1464.91
599.216	124.464	503.799	173.95	1199.14	197.219	1626.95	2086.52	520.136	878.023	558.596	822.531
609.383	117.682	732.903	131.496	1057.86	163.263	2284.25	2057.36	804.054	1513.7	580.05	849.102
634.974	125.948	789.699	145.767	777.744	157.525	1426.01	2086.99	2530.15	3906.44	698.923	1083.06
601.443	132.6	1262.46	177.165	899.953	116.174	2344.31	3915.08	720.166	1577.07	553.761	868.47
891.536	125.747	656.031	133.303	1420.7	193.07	1711.03	1936.7	2518.4	3016.21	336.378	715.188
666.913	122.122	655.258	105.974	975.155	156.721	1368.46	2003.95	1560.01	1662.95	539.165	693.708
752.771	152.807	696.378	117.657	1258.43	173.753	1760.65	2022.82	687.665	1419.09	523.559	687.318
1455.5	143.225	621.726	184.915	918.765	119.021	1723.64	2883.09	1259.25	1565.53	489.978	839.288
1377.22	144.528	526.708	161.221	656.727	144.837	1988.05	2644.11	787.968	1532.58	574.684	695.397
636.987	100.255	699.347	198.556	559.453	178.651	1175.41	1900.7	1325.31	1423.98	723.669	997.531
507.23	99.76	634.48	196.815	750.545	140.62	1483.81	3006.3	911.594	996.484	687.416	1071.8
666.197	98.9062	599.421	169.815	429.027	139.607	890.134	1305.85	875.036	606.274	488.112	763.132
624.368	135.246	568.039	158.6	706.809	163.893	1219.66	1978.15	849.345	1344.08	532.94	828.801
620.888	83.48	1203.27	126.312	681.524	157.991	1805.56	1863.42	1940.02	1482.51	320.392	803.406
797.308	98.5337	622.202	115.867	427.335	118.87	1312.49	2227.31	1444.01	1725.45	350.597	797.873
872.977	148.168	696.569	129.305	507.691	144.204	1259.41	1628.96	802.451	1073.78	454.335	582.848
569.995	112.791	696.676	120.386	532.747	124.234	1995.94	1755.82	657.928	822.782	457.388	978.138
788.378	127.695	665.284	115.664	619.633	144.926	1840.62	1960.01	325.497	317.374	518.899	880.213
1063.14	138.382	643.481	64.8924	531	165.746	1627.54	1467.18	403.889	1077.64	449.371	630.121
795.896	134.401	982.851	242.909	547.674	157.113	1809.96	1389.55	633.279	1104.34	395.277	774.604
1040.49	162.641	1072.49	253.854	616.378	119.129	815.845	1325.84	699.026	818.953	397.849	552.113
1007.42	135.8	1260.66	232.301	390.283	128.15	996.401	1784.13	584.086	756.998	452.397	748.446
842.413	153.806	1290.42	206.649	548.207	147.686	1270.72	1883.38	410.557	560.744	445.968	974.866
746.246	158.59	576.946	121.513	398.169	111.326	1179.32	1118.94	500.417	804.061	340.214	1133.36
553.814	171.873	594.783	129.357	345.26	117.052	1093.84	1037.35	2989.66	3317.64	473.49	833.156
900.047	212.781	739.915	135.922	485.677	115.083	1017.94	1472.7	705.935	2009.92	515.599	990.289
789.133	164.409	554.273	127.31	299.169	76.3529	1371.55	948.492	1490.18	1987.09	541.149	1192.18
1033.51	150.595	494.763	79.9486	352.254	75.9893	575.863	949.614	442.154	738.356	480.615	694.041
1425.05	188.399	588.793	92.7907	355.568	94.2667	962.331	1740.09	485.981	669.928	319.777	637.92
843.152	255.009	793.733	99.7524	353.958	61.8881	980.526	983.614	528.585	797.363	507.569	828.843
875.192	246.432	914.174	93.6069	416.635	54.6898	743.603	905.807	625.069	1274.07	465.251	839.368
1562.88	163.345	696.393	88.2159	346.856	54.2556	437.359	566.143	324.344	380.304	522.393	723.908
1324.85	147.517	496.873	54.6139	401.374	53.7906	505.544	1023.6	661.721	666.963	580.719	936.205
1269.26	141.655	503.396	69.037	299.312	55.3254	559.697	1499.6	527.419	1380.44	519.088	741.857
1174.68	147.644	586.877	87.728	374.096	48.3526	537.8	1538.01	701.621	507.102	431.514	995.539
745.472	152.908	999.567	157.046	454.724	62.9569	510.795	1418.55	466.867	643.326	703.357	1590.22
548.733	55.4462	1044.7	142.058	321.179	51.7555	491.4	762.912	435.29	519.793	668.484	1466.65
962.846	77.6741	481.588	105.422	630.057	159.264	593.023	1710.28	620.045	492.168	569.698	695.408
905.891	85.0815	870.353	110.215	552.796	162.581	480.36	745.847	279.016	818.718	637.155	1150.37
836.852	84.5793	1423.49	178.104	599.15	170.569	481.921	859.6	618.869	1246.64	646.193	1209.01
717.857	89.3974	1149.92	192.729	893.76	169.882	1258.75	1613.79	928.891	1803.73	444.317	678.336
887.995	86.6049	970.632	147.001	418.884	136.274	2349.93	2953.8	1363.87	1673.88	525.463	1174.38
1026.22	87.6102	949.238	143.211	423.62	166.488	1643.61	1614.69	2407.03	3340.67	622.158	738.044
1444.43	99.0705	1091.11	138.44	458.158	155.446	2801.53	2493.83	719.975	1570.29	447.619	1151.45
1450.72	95.1719	913.392	213.821	426.935	71.253	2326.64	3461.46	1453.03	2719.36	566.361	1368.54
1078.55	100.111	822.557	138.959	457.661	66.3866	1660.61	3068.16	1104.71	1671.7	468.224	714.29
892.102	94.7721	777.25	132.194	447.462	57.461	1332.13	2229.98	402.865	632.655	459.459	1579.35
1326.48	101.611	1179.1	134.521	707.248	63.0077	1412.95	1879.46	472.263	1023.96	487.507	722.816
1556.8	98.402	577.814	112.237	484.87	66.1081	1650.08	1770.84	333.241	1433.83	538.625	1163.09
455.107	84.574	931.545	121.096	556.439	144.316	1337.65	1773.77	547.806	746.497	538.464	1074.64
436.732	79.0122	918.307	101.969	358.486	114.237	1911.39	1978.97	645.031	1219.11	465.297	903.631
780.172	99.9164	652.539	101.232	735.461	59.145	1136.6	1321.53	556.368	1068.79	491.854	676.382
527.496	80.7461	535.246	93.6864	832.596	57.9409	1247.13	1452.67	322.476	1054.29	355.467	666.531
465.294	83.5878	590.722	109.211	667.082	78.8282	1792.34	3220.84	568.565	1474.83	409.912	756.674
757.606	118.677	904.706	105.771	894.965	71.5809	1764.23	2913.04	406.168	1625.27	743.757	1095.48
513.268	96.9485	535.759	121.706	295.115	58.9749	1326.46	1811.71	586.102	1862.46	588.582	760.057
1249.37	125.798	561.282	108.529	309.776	58.0655	1581.56	1704.12	2133.86	2068.48	618.602	973.571
516.25	113.48	447.908	102.1	386.418	139.975	1435.68	2080.67	1766.74	1639.47	721.916	1534.71
515.256	89.9094	484.475	88.7216	366.035	69.8609	1865.11	2864.95	1281.91	1624.56	521.676	846.034
743.859	106.678	548.637	98.2465	378.433	60.4489	1782.29	2604.51	899.904	1189.67	688.781	912.876
804.338	117.392	1043.46	73.0794	285.149	58.3134	1394.91	1400.38	1816.39	2615.26	750.273	986.468
606.028	91.08	882.558	78.4819	452.905	63.2694	1486.48	1241.49	526.735	1591.97	362.861	899.94
493.743	100.648	993.604	82.1755	475.641	75.0179	1773.73	1288.71	1679.46	1659.14	620.2	1055.3
583.421	124.561	759.645	179.049	324.691	83.523	1209.98	1286.17	1892.55	1487.29	623.453	965.243
757.931	103.438	896.784	97.0057	279.729	64.0417	1786.21	1705.41	582.801	537.09	592.731	974.24
707.383	107.078	817.349	115.287	285.085	73.0094	463.678	832.363	465.567	1260.1	649.919	940.903
684.949	104.846	604.026	93.251	486.959	75.8646	586.996	983.95	528.448	1429.8	603.8	1226.4
741.233	115.686	951.587	59.5468	484.923	75.5798	667.466	781.014	778.019	1571.91	554.725	1314.05
752.663	102.486	831.787	64.7664	441.403	73.084	508.84	650.501	1809.75	2831.14	438.121	1262.03
671.761	104.327	462.121	78.0929	454.301	74.6025	619.763	776.996	969.788	1744.77	598.945	1029.39
1324.76	135.554	939.837	85.7338	467	75.0543	596.393	2363.27	2802.54	2449.45	348.733	939.437
1560.94	150.034	1228.3	118.01	370.457	72.7391	575.378	1416.87	1211.17	1392.88	497.911	1061.09
1710.83	167.116	921.359	65.3111	412.798	69.886	639.799	1335.28	2149.11	928.326	664.997	925.911
1408.01	148.801	1252.82	95.7612	393.228	58.0483	848.205	3334.07	2187.61	3179.62	365.255	944.841
829.777	155.32	1248.41	83.6988	337.418	97.4728	566.115	1328.43	674.085	1629.46	528.912	1510.75
1064.48	145.372	1412.4	113.368	306.114	93.7954	646.416	1075.3	782.81	1774.84	254.915	1164.88
746.291	72.4094	831.881	38.4812	573.477	76.1277	929.338	2886.79	1144.18	1723.43	242.53	1775.56
694.519	66.8346	768.316	120.958	407.315	74.174	841.128	3345.01	1298.22	1606.56	331.293	723.175
371.132	83.1579	675.632	37.8506	478.206	78.9343	412.873	789.199	2511.69	3040.75	293.835	668.108
406.897	78.5464	692.326	47.6503	407.259	63.6486	471.041	1036.03	1736.27	1433.7	302.758	472.869
450.268	84.567	879.262	67.9162	360.992	76.7073	582.655	2291.29	1854.65	1210.4	312.986	842.015
464.399	69.5246	995.706	78.9841	372.387	67.7829	725.997	2792.84	1021.2	1728.99	262.775	708.321
517.186	97.331	1510.01	86.0684	417.315	66.5753	622.947	2589.17	1353.56	1551.04	267.923	656.161
475.855	97.0725	769.711	86.4751	400.547	69.4664	637.948	2793.94	1014.1	1530.18	341.618	631.943
460.9	102.175	833.02	33.0928	341.691	67.7005	680.987	732.289	894.059	1300.79	325.351	665.676
527.718	98.7225	884.569	44.023	414.474	49.0161	547.251	2535.77	1753.22	1750.37	252.629	1063.99
529.803	116.619	430.315	89.2992	383.974	82.2737	510.603	2387.92	2090.35	1845.2	382.33	560.99
503.084	191.47	612.62	90.9273	342.779	107.598	537.713	1188.06	548.714	739.193	272.742	1081.33
490.865	135.365	520	86.3264	263.579	132.223	832.01	1530.95	460.336	687.265	262.729	819.28
512.229	144.454	1206.63	128.862	391.081	114.885	429.731	1400.48	535.555	834.977	307.477	1144.98
988.823	187.387	955.837	162.3	363.342	126.138	972.043	1391.15	370.629	951.127	274.537	692.965
1058.87	163.226	1448.23	201.27	278.838	120.047	701.777	1014.8	2037.63	2671.82	284.713	767.768
1150.04	164.864	1206.5	169.197	256.566	102.172	581.665	1593.56	1134.89	1086.14	339.07	868.463
770.44	144.457	1288.38	191.908	334.26	112.588	813.766	975.095	632.202	1769.6	321.504	877.661
837.617	153.793	1033.63	180.272	318.331	112.949	414.654	1417.57	1978.75	1371.36	245.68	826.268
887.367	136.531	899.531	186.502	296	123.736	624.546	972.467	1488.34	1545.63	296.313	767.324
862.007	146.265	518.354	140.504	239.387	127.514	356.444	856.613	1461.21	1544.31	237.774	941.499
940.585	158.746	730.242	125.014	341.436	127.841	1423.01	2151.61	692.067	1851.93	308.013	761.201
890.241	143.38	504.289	114.762	348.372	80.1809	870.037	1306.15	401.45	1084.35	255.32	982.364
900.781	143.836	690.241	108.066	334.576	63.7855	501.741	1097.78	506.322	824.194	236.538	605.573
866.274	119.609	615.602	140.333	305.924	64.407	586.487	1967.29	434.285	1055.6	316.552	543.871
891.258	133.608	712.127	149.904	274.95	52.7715	570.264	2000.87	520.59	1131.83	405.147	727.873
818.359	149.283	630.26	143.847	252.287	57.378	555.205	1060.67	396.214	693.051	300.865	467.705
921.892	115.208	636.951	128.198	262.846	49.8791	469.998	1879.41	750.575	2212.38	331.575	1106.84
1274.38	138.956	578.006	106.235	684.376	52.1323	521.259	1036.8	404.927	388.961	292.003	740
1289.95	168.222	643.408	100.532	583.499	29.034	349.443	1351.17	543.66	1081.52	262.232	473.563
1554.5	154.235	535.659	146.765	775.719	56.8957	491.61	1948.61	414.097	1225.56	476.623	941.429
1369.4	150.36	749.234	92.9965	541.742	35.4453	449.023	2761.34	405.763	1243.48	275.927	874.004
1416.84	193.164	986.273	92.4478	536.778	32.4792	407.138	716.312	1945.12	1659.95	305.636	715.194
1397.31	206.513	499.779	97.3456	421.431	31.3211	816.85	936.88	812.725	1721.47	303.3	910.479
1354.89	188.258	699.911	69.7367	657.16	31.4039	565.274	727.76	2126.92	1774.85	414.136	1315.28
1717.7	178.497	667.637	76.4384	302.738	38.0123	698.047	1266.53	1184.41	1464.92	395.513	860.972
2028.48	180.784	662.586	76.7174	245.522	45.1826	1008.77	1127.21	2374.93	2894.25	357.665	968.226
1158.79	212.039	606.158	74.3898	372.73	49.7082	385.5	1046.45	846.974	1554.39	746.344	750.372
1266.71	204.434	736.681	71.513	346.031	57.3681	400.439	948.62	913.555	1063.87	540.125	1859.86
1476.57	166.547	472.407	75.7852	963.667	74.0174	572.771	1059.9	948.954	1724.44	274.767	765.493
1348.53	156.832	689.101	99.7072	1083.7	73.2606	538.136	2068.48	1111.18	1720.52	368.955	1102.78
623.112	125.561	644.718	96.2859	482.531	74.4181	399.328	1648.03	2256.05	1949.96	527.737	82.0875
1350.63	104.975	679.746	86.2557	444.778	81.4352	935.789	1778.42	2524.28	1645.14	349.516	803.943
847.95	72.6804	594.276	73.5127	413.188	108.019	1460.85	1867.7	1810.2	1974.87	378.692	669.098
1069.47	105.303	513.501	77.2481	519.591	94.5218	951.114	1979.77	1871.49	1680.26	283.034	869.113
774.195	130.285	529.696	94.1946	301.852	67.7593	1720.9	2609.09	1942.03	2333.75	449.473	552.186
703.413	130.442	788.969	80.3502	396.697	59.6168	1463.14	1943.04	2312.01	3860.69	431.063	637.924
415.794	95.2577	574.06	88.8014	299.955	59.99	807.021	1611.87	1210.3	1262.7	422.01	708.985
816.917	102.491	892.877	97.4404	358.708	50.6897	884.423	1239.48	1373.33	2234.77	281.302	753.325
420.796	85.4409	691.71	88.571	375.309	55.7708	673.044	914.289	854.718	990.305	349.33	1298.35
555.12	85.4735	520.369	74.9167	383.024	64.6424	586.033	1229.89	536.079	1093.91	416.636	659.337
437.875	81.5312	647.694	97.1124	268.196	61.8446	483.796	963.028	403.49	1137.1	429.454	906.215
559.652	79.2049	677.689	72.7736	263.911	52.4851	721.089	1067.79	427.322	429.874	424.112	960.317
514.092	91.9595	730.838	63.2828	439.451	52.7061	713.699	754.413	315.847	523.627	244.914	719.13
455.54	74.1587	551.815	68.4819	451.907	65.6733	626.411	1037.48	379.571	536.36	501.064	530.24
630.58	103.517	462.021	48.8601	335.504	68.5119	550.958	598.73	389.582	447.483	770.326	751.532
649.344	106.884	536.686	63.3286	305.716	50.944	448.904	1133.07	379.699	1078.41	751.062	767.07
915.57	95.5339	667.521	60.7086	319.035	63.6686	348.118	2366.73	671.947	911.837	506.99	1000.64
574.025	98.7488	545.841	60.9461	388.879	61.6089	886.302	2068.02	483.127	918.224	529.095	883.116
515.044	98.6355	759.725	59.664	541.815	63.1025	433.855	686.653	353.658	1197.21	582.829	755.413
695.614	121.507	1040.86	116.844	421.033	70.2038	387.214	749.508	1563.21	1344.3	396.184	532.494
498.383	103.513	747.923	88.1925	307.664	68.4357	587.139	1267.56	489.123	1886.26	299.126	680.438
597.096	90.1518	988.188	104.404	466.88	69.1851	317.359	895.951	1605.78	1159.69	451.955	742.752
605.678	92.5685	760.652	89.058	423.766	70.269	461.686	1540.62	564.891	1874.3	455.538	721.117
694.565	96.1043	1282.11	97.9377	411.491	78.039	705.288	1209.21	355.993	1455.19	449.648	518.478
574.669	90.4615	677.62	85.0581	420.709	76.0836	1440.66	1988.15	1907.53	1967.02	575.978	582.147
588.014	189.458	890.716	94.7663	459.405	74.9848	1602.72	2096.39	836.574	806.25	456.694	344.529
847.811	143.045	602.646	95.804	388.703	69.5667	809.242	1701.44	2151.35	1772.36	452.865	499.29
558.667	122.246	771.85	77.0795	459.233	106.242	1697.73	1793.93	620.188	1346.51	413.938	894.344
488.286	111.38	801.661	81.0856	455.931	112.223	1296.59	1672.23	485.051	1117.02	464.101	590.167
581.876	127.253	583.81	90.6338	446.875	107.014	1325.13	1599.41	594.404	1408.71	448.292	1037.55
809.654	106.744	686.825	83.306	469.559	84.1476	1114.97	1637.9	1714.07	2238.89	388.888	847.997
1067.26	138.105	682.019	80.2844	340.793	87.3889	1153.67	1640.22	3313.54	2615.02	542.098	776.756
692.598	106.12	603.093	78.113	303.9	88.0498	1675.76	1562.17	801.386	864.038	375.583	776.622
869.251	107.797	504.08	85.1527	305.292	76.8413	1232.21	1712.78	1718.69	1717.44	618.379	958.578
653.415	113.488	515.935	69.1685	309.718	82.1846	605.242	1525.94	2391.21	3510.35	504.596	755.523
943.962	122.154	631.661	87.4598	282.909	96.2879	1239.47	1413.19	761.899	1439.86	469.106	794.795
820.561	119.092	616.893	83.5733	341.279	60.9896	1227.91	1845.34	842.006	1620.24	556.086	512.736
838.587	130.524	618.08	82.3191	342.342	63.3827	1297.42	1447.72	784.745	1486.12	570.148	963.474
611.375	123.182	573.808	57.8294	328.95	65.7278	1307.98	1463.95	1790.7	1329.35	437.449	364.491
1082.51	143.51	543.128	105.368	390.73	73.2617	854.358	1335.9	935.432	1358.51	406.481	541.661
1053.59	167.94	1666.44	148.429	286.28	70.5	1097.49	1344	2430.13	3807.52	499.756	835.937
1687.36	216.823	1056.85	132.786	346.903	65.25	664.895	918.467	3719.5	3243.82	322.928	988.163
1511.46	193.235	727.572	87.5077	362.897	76.9408	1377.45	1468.49	411.714	1615.69	535.422	1086.11
605.262	153.943	866.979	87.9495	307.02	96.9208	430.096	724.715	1638.72	952.462	418.715	938.657
742.941	205.775	507.516	100.785	448.544	90.9188	469.594	718.049	1820.54	3456.93	537.478	849.669
592.189	94.4646	757.155	94.3099	601.732	86.759	426.082	639.801	1855.78	3025.06	426.249	1007.49
2333.83	97.8382	726.455	99.5094	392.653	85.6743	596.327	1018.74	974.144	1419.48	578.879	896.373
1299.05	116.286	569.709	98.6259	340.078	109.512	439.78	802.446	411.515	536.946	632.242	686.496
2288.35	113.376	1104.83	151.73	456.046	176.27	402.382	1127.96	803.319	753.531	256.241	427.328
500.405	61.5476	604.848	110.794	370.912	94.6808	413.821	1792.36	956.309	1423.12	423.016	477.461
556.477	116.818	1273.11	90.5879	585.894	98.2465	509.784	1198.59	1802.2	1403.28	550.873	649.739
819.782	118.383	981.463	90.2917	720.33	91.0817	492.414	1476.04	1199.08	1507.57	521.913	508.681
556.038	96.7934	1587.28	121.514	671.987	84.0551	481.659	2252.3	1594.05	1433.32	445.068	425.215
471.977	87.2214	1085.17	88.3708	1087.3	146.721	583.769	1147.64	763.358	1307.45	386.74	466.813
623.212	162.594	798.425	90.0712	977.644	187.204	505.454	1129.96	546.54	1062.28	537.977	577.336
585	132.654	668.831	92.996	698.392	130.158	346.802	769.249	360.698	1077.93	277.949	369.774
651.354	107.307	979.73	92.7428	334.151	125.752	496.851	1299.85	356.085	1300.12	293.881	498.995
519.462	105.7	607.912	87.207	385.385	90.228	526.43	1451.65	446.859	752.143	276.024	557.718
839.511	136.82	522.275	83.4216	334.428	105.237	514.989	1580.21	344.732	677.596	375.209	772.351
656.682	117.303	621.064	92.5103	453.794	129.693	634.353	1151.92	1950.14	1512.22	327.108	454.818
726.303	126.576	859.963	93.9287	417.583	107.61	594.126	1008.49	968.909	1483.44	327.14	680.331
610.234	106.263	797.191	96.7894	384.939	105.15	343.155	667.636	2706.84	2553.53	312.72	624.316
854.462	135.744	578.966	91.3677	281.641	70.8884	319.852	952.268	2191	2004.36	505.544	739.08
634.597	108.467	651.212	82.5192	485.749	68.7705	1423.19	2503.71	1781.13	1621.41	311	735.612
1009.56	128.404	859.848	79.576	245.778	62.6173	1734.12	2137.97	510.382	1668.68	358.86	592.347
537.359	87.9081	700.781	82.7272	355.324	52.4644	1407.47	2021.71	1127.95	1570.79	591.392	709.022
584.928	89.7259	703.01	85.1747	590.336	72.4181	1419.62	1895.94	941.023	1638.44	543.995	760.789
792.336	93.5433	942.092	75.6892	313.122	57.3299	2122.86	3281.99	756.801	1038.23	306.244	759.284
592.362	116.043	952.106	83.5689	339.244	62.6838	1375.14	3603.3	481.841	1542.23	535.375	970.059
441.184	105.621	758.445	97.4508	316.186	54.3602	1168.48	1610.14	1375.01	1469.88	774.496	945.266
598.935	120.899	600.036	81.9805	372.7	65.2395	789.19	1475.26	500.145	1643.56	353.441	629.48
564.154	111.284	869.748	98.6898	274.481	63	1093.77	1458.55	487.321	1570.37	442.858	667
612.826	112.106	914.138	75.4951	281.307	58.5	1505.92	1801.18	478.341	1803.83	479.039	679.566
565.669	115.6	551.373	79.5742	276.959	57.8103	1475.39	1464.54	319.189	960.821	311.964	726.77
592.272	105.11	606.128	84.7829	251.932	66.4525	1367.75	1313.18	463.172	489.842	512.077	730.992
774.053	105.726	518.338	77.7861	242.412	54.8364	1341.69	1571.89	315.556	1451.62	672.292	1265.54
618.871	111.153	573.596	71.9458	610.402	47.2446	1105.59	1517.84	382.003	1142.28	447.425	697.169
876.286	134.583	498.492	77.5242	362.433	49.5338	1612.75	1883.52	360.646	949.665	524.819	688.679
951.257	132.834	692.713	77.2565	504.689	49.2352	1009.09	1885.31	538.409	937.751	530.984	591.696
710.501	94.8633	571.926	74.2557	270.577	56.6338	851.056	1544.21	286.158	1090	411.49	648.465
542.287	99.4976	686.346	77.8512	245.804	55.8478	782.781	1536.61	521.158	711.245	360.797	547.514
795.532	134.474	470.178	73.4653	419.381	54.3273	1223.32	1378.56	847.597	513.774	300.751	1242.01
738.96	156.171	499.605	64.3951	326.522	51.1191	1022.02	1322.51	370.996	1019.74	303.159	733.214
740.674	38.1979	545.994	66.4511	388.683	50.9851	861.094	1416.54	249.457	991.429	395.141	744.36
548.227	88.3988	674.193	67.8905	273.134	52.5625	660.91	1433.57	649.502	1672.69	252.99	246.42
1335.46	59.6282	1173.35	61.0016	420.473	49.3839	942.791	1384.64	474.309	1485.81	265.2	695.795
1549.36	66.8521	727.847	56.1046	312.754	53.9787	720.452	1022.76	495.822	1085.83	311.874	336.234
1808.69	70.0193	745.753	69.2228	286.451	57.5247	1428.54	1115.51	531.542	1559.97	392.152	479.054
1194.28	55.5861	550.845	76.2385	494.007	58.0241	1641.61	1126.75	531.439	1374.02	483.534	1250.26
1718.22	71.1931	2165.28	87.0668	527.648	57.7785	853.234	1583.84	563.217	964.164	688.798	1693.28
1668.21	80.5934	1023.66	47.2976	403.339	67.3609	1132.26	1594.33	563.983	1704.19	592.962	1121.03
480.693	88.0929	812.491	126.517	382.79	55.4685	660.449	1204.72	1604.79	1648.8	475.047	1074.58
382.882	107.794	691.266	70.381	756.381	60.7394	1286.06	981.589	2749.19	2130.6	535.73	631.818
395.734	92.2446	714.369	63.7259	350.571	58.0833	1241.87	2531.79	1882.16	1689.85	448.262	511.121
503.572	80.1377	739.751	62.7853	334.964	58.6561	957.24	1607.05	519.272	1990.79	527.229	898.357
445.855	93.3614	595.052	61.194	440.387	66.1198	460.335	720.97	2060.69	1777.1	464.515	587.578
568.398	89.4709	598.593	64.0079	583.5	67.1126	486.307	803.419	640.221	889.939	589.288	1084.44
372.619	96.4762	578.855	65.2669	411.177	66.4722	613.036	726.668	789.622	1480.73	372.61	836.437
392.822	104.067	636.251	71.6159	476.378	80.763	869.047	822.317	1139.93	1175.96	499.715	1609.83
488.049	94.1195	602.293	69.8429	405.651	85.3771	513.543	922.008	816.652	1336.54	376.509	866.717
508.854	100.519	868.364	70.2074	618.493	98.806	554.27	645.757	1281.75	1058.04	561.44	706.33
592.992	97.9314	710.287	70.8434	615.121	52.0606	638.461	747.189	472.72	1619.83	565.814	1959.57
537.819	94.0791	628.648	75.3835	1209.7	67.5634	522.444	1041.27	449.592	1761.94	461.781	964.484
554.736	109.87	802.864	72.6128	1472.18	71.3311	375.66	650.107	435.877	1711.22	479.248	1141.71
460.903	91.4032	844.08	75.047	591.5	67.8864	524.972	751.638	430.414	1468.31	579.54	692.886
404.868	97.6374	512.904	70.8488	696.211	60.8158	436.182	679.137	664.445	1735.61	637.894	1018.68
499.004	93.7549	752.818	73.6886	911.506	76.5105	1927.87	3629.02	542.003	1046.16	338.273	830.349
503.463	27.2632	581.9	79.5929	1339.73	62.1668	1276.32	2196.13	1831.26	1627.01	415.262	963.266
551.287	109.238	644.3	74.3638	1297.37	67.9089	2355.63	2460.43	770.61	1546.49	606.357	981.056
573.086	119.957	508.904	76.4104	863.773	55.8179	2323.82	2856.77	2113.59	2749.07	573.689	596.231
532.958	116.947	822.711	72.854	415.52	77.0392	758.913	1389.41	873.037	1567.2	760.607	1022.53
457.296	99.3761	701.67	78.9173	446.295	85.2466	672.278	1605.37	651.566	1663.88	315.635	731.891
525.377	97.1712	1024.04	71.3758	737.113	79.1071	706.076	3469.69	880.754	1689.28	558.234	1076.21
696.665	97.1128	590.304	90.3582	409.099	70.0636	927.969	1847.42	1192.94	1755.43	446.321	690.677
553.3	95.5	635.388	77.3274	416.828	67.9704	639.125	2965.64	2544.83	2361.95	579.583	816.376
608.149	78.7307	622.609	86.1984	430.733	69.8477	1188.17	1650.89	1865.56	1457.5	289.459	438.134
460.756	79.25	791.865	68.8948	354.112	66.3339	742.414	1670.69	778.979	526.35	465.198	619.582
1309.78	96.7523	654.559	83.2195	320.592	57.6746	1138.34	2325.49	943.565	1451.78	267.204	327.871
958.107	176.083	567.531	78.0608	359.553	53.3059	910.322	2756.57	1524.08	1573.9	316.117	277.952
1106.73	162.746	561.595	71.9177	386.076	59.2817	914.848	2985.72	1354.1	1191.72	402.216	551.518
528.665	91.178	772.528	91.5431	353.644	67.3333	994.283	1407.58	762.794	1339.99	303.11	898.231
540.719	87.8844	784.22	85.2224	345.623	69.0833	1335.04	1912.37	572.014	999.94	335.463	541.241
595.74	117.325	769.613	98.2361	303.876	57.1634	875.693	2747.92	799	1580.31	283.897	256.21
451.138	107.486	675.202	54.1323	394.171	55.3143	820.422	1506.74	760.894	1282.3	237.469	584.869
512.866	105.639	835.826	55.8868	372.949	52.5949	773.741	1234.79	574.99	594.751	257.169	467.771
579.113	101.958	795.935	54.6494	298.784	44.1261	597.406	756.725	618.981	840.26	372.215	851.104
1113.75	148.892	565.541	61.5791	348.378	43.612	1025.92	853.561	635.475	476.106	266.216	573.874
772.356	143.151	1111.91	62.2043	410.202	41.3152	492.471	838.485	331.006	607.288	314.188	569.463
784.164	145.569	619.619	53.4929	332.495	45.3879	569.993	1933.92	295.526	612.27	347.304	746.325
757.238	134.525	672.681	57.7645	349.439	45.4141	526.189	877.15	329.831	641.173	243.779	576.794
737.608	124.188	504.567	82.9927	341.787	39.2394	407.963	704.425	410.663	700.815	335.222	667.676
868.986	139.979	710.434	79.9688	365.8	53.5274	533.206	975.968	2378.89	3452.21	338.205	798.679
2132.54	148.186	736.481	79.9984	294.934	49.6321	781.929	1318.53	537.181	1674.3	313.093	2119.65
796.076	113.43	673.814	73.1253	391.386	49.2362	510.988	1418.47	3143.19	2397.88	277.497	683.505
1078.87	58.093	536.316	83.8244	456.496	45.4805	603.036	1870.2	1848.19	2919.76	243.24	407.78
1617.23	77.0374	478.515	98.2836	302.607	46.7087	500.66	831.17	1195.1	1885.95	276.119	628.344
1732.86	84.5219	630.526	91.3904	356.58	58.715	460.685	1364.41	2939.4	2609.52	243.27	789.166
1246.32	83.8471	570.887	69.4025	462.666	62.7223	1057.95	1058.34	534.687	2030.92	290.267	757.287
1830.34	77.3694	715.216	73.5671	459.957	61.9071	1025.46	926.832	668.893	1289.12	590.253	2089.14
1666.58	86.6202	587.141	66.5131	392.168	58.2391	739.423	1110.72	497.791	1145.02	398.336	1844.18
1982.13	90.8845	930.932	68.5309	445.272	59.2069	702.414	1308.23	384.712	857.209	346.346	774.971
1059.69	74.1919	576.94	80.8063	400.062	57.26	481.88	862.601	381.34	608.94	403.94	1608.33
1824.44	93.0992	695.947	84.3138	494.477	61.3153	584.74	1675.22	415.625	1119.43	523.608	2094.37
862.85	35.1121	514.373	78.8588	477.243	57.6066	803.753	1136.44	425.333	1297.63	429.65	1749.79
1801.89	102.813	754.174	85.5108	617.829	66.392	328.358	702.192	457.139	1553.98	305.165	882.456
788.295	75.5449	488.526	80.7672	572.555	58.1431	1018.35	1513.42	577.466	982.401	511.901	1833.42
1611.58	93.2248	716.595	88.296	482.199	56.9513	643.193	1530.22	507.972	1724.09	272.54	797.198
1247.31	83.317	783.241	68.1575	482.314	63.3809	533.269	1575.64	730.227	1051.09	421.064	896.958
876.995	94.8646	745.065	57.248	620.208	57.3625	648.101	1566.05	853.845	1061.93	309.966	722.643
636.305	82.0159	852.612	65.7847	367.805	63.1519	835.293	1780.22	803.912	1307.07	346.305	1047.08
603.96	92.2527	559.779	53.7308	434.757	60.1826	511.5	1717.73	1234.6	1493.32	348.166	619.334
880.351	103.438	846.296	67.5	495.235	92.1991	480.183	1118.83	698.71	1158.07	373.947	603.09
748.236	88.8714	670.5	79.4762	736.026	40.108	391.337	1261.58	358.46	1234.13	309.622	577.629
442.361	77.9785	500.948	64.3869	663.37	34.8824	536.177	1736.78	560.647	1090.92	299.259	628.529
465.009	86.5721	752.243	72.7495	704.052	29.4983	451.399	1400	325.08	912.275	322.343	768.128
497.477	98.6492	655.636	77.188	931.047	43.5281	975.801	1183.93	405.2	1043.79	359.828	703.616
611.958	101.972	885.333	88.9829	895.185	42.4046	681.114	1220.56	515.076	2374.2	254.084	451.695
638.67	101.957	609.674	68.1908	761.446	77.1423	548.284	1096.94	1435.84	1684	262.742	1021.61
673.891	122.832	602.351	60.3471	436.715	77.9893	497.965	1446.94	2486.08	2129.38	282.167	479.084
540.914	88.3887	634.563	84.338	761.036	56.378	418.018	829.257	887.284	677.156	265.026	441.183
641.186	88.9553	688.314	69.4502	683.366	49.6959	827.123	1224.57	1079.22	1381.86	334.425	896.13
721.66	117.304	558.604	76.63	714.031	51.3221	484.877	1037.53	491.452	1039.55	316.73	768.536
691.493	115.681	400.511	77.1429	581.146	78.2391	645.845	892.73	637.793	987.625	408.973	870.337
432.256	109.963	748.3	85.9757	694.81	31.5432	504.394	1013.66	1290.7	1207.39	343.98	453.49
416.686	101.242	641.559	85.119	465.634	65.6504	506.497	773.902	940.824	832.237	385.824	971.004
576.312	112.641	531.995	110.774	949.508	32.1188	485.206	1391.61	247.259	1066.8	282.37	824
559.54	137.898	620.267	98.814	640.867	86.1481	513.21	1165.51	474	1787.51	390.734	898.999
875.488	118.543	647.951	125.201	739.769	81.051	687.252	2262.89	503.422	2310.91	276.861	1435.39
861.575	129.448	1107.97	94.2661	839.135	29.4029	625.711	1416.66	533.953	1201.57	259.867	1033.9
664.315	109.436	700.326	102.584	664.419	90.4078	444.162	1823.93	607.908	1405.59	376.879	691.253
695.757	127.753	1231.87	94.026	846.641	82.0198	360.607	829.642	3142.56	2405.49	233.004	429.015
845.662	111.733	1321.07	72.5124	425.186	95.1062	672.375	1683.1	630.907	641.148	311.806	773.678
675.202	114.364	1081.12	78.4538	762.022	84.197	448.294	412.191	978.763	1708.1	326.818	1056.46
609.51	99.9871	699.608	71.994	946.968	77.0285	776.819	1690.45	1069.26	1582.72	314.194	646.026
464.752	105.248	696.018	127.976	536.224	95.2804	650.44	918.03	2794.93	2194.61	325.848	573.278
476.287	79.8511	691.242	66.9501	858.698	81.0032	961.407	1750	1599.89	1886.13	356.918	565.888
2389.5	144.159	494.9	87.8162	698.361	88.9776	682.743	1415.66	1761.33	3322.76	543.995	542.795
1409.15	149.852	840.28	80.3773	1301.46	68.104	661.323	1293.87	2577.66	2969.47	239.619	739.493
1403.84	122.292	717.843	68.221	994.68	61.7636	501.575	2028.97	1577.03	1379.91	293.337	670.09
1880.08	137.82	631.394	82.9859	1848.76	72.5187	485.599	2045.63	612.238	802.456	408.435	1033.17
1467.87	94.3345	720.026	76.5128	1323.29	61.9468	483.648	1066.88	888.589	1413.66	422.678	608.24
1217	136.262	698.32	70.9592	854.494	80.8722	500.866	1161.53	589.103	591.721	480.735	780.575
1169.64	126.255	522.958	79.1048	1187.65	68.4165	532.432	2331.01	839.833	1293.66	481.154	902.068
1218.02	145.344	434.286	72.1667	1222.89	67.0848	489.366	1052.35	844.122	1758.71	461.317	885.546
1616.8	144.539	633.084	100.05	1069.66	56.598	445.932	1368.96	793.033	1358.94	325.3	622.848
1319.3	156.473	657.813	87.3055	1469.29	69.8755	947.35	1217.6	589.896	730.137	489.764	548.119
1101.05	94.0156	1182.58	70.2187	822.672	79.9971	444.825	1616.02	577.101	801.458	419.685	811.961
554.577	103.569	535.977	69.8105	1330.43	54.2456	1255.9	1699.97	672.222	1744.71	253.108	589.133
1250.07	166.264	572.563	65.3607	858.95	50.4338	507.878	959.25	738.065	783.581	295.669	286.329
1659.35	181.628	628.081	71.3516	303.052	59.9908	443.677	1074.44	610.539	1033.64	435.188	608.455
1377.89	167.237	603.248	65.8737	278.14	61.9355	535.704	1696.03	450.174	516.806	448.512	651.272
1847.93	185.659	711.237	67.2398	465.177	60.1527	831.368	2159.18	574.282	682.234	304.549	1270.43
883.974	161.709	498.728	69.5054	462.448	57.1678	378.46	1260.51	1208.76	1614.18	697.302	737.927
1377.9	199.917	554.762	67.5772	318.761	55.9091	400.349	1429.18	470.27	1209.66	609.428	714.107
535.114	434.582	503.315	79.4785	355.259	58.5843	498.022	1810.68	2663.61	2531.7	388.372	598.766
759.624	546.91	603.218	70.3435	298.69	57.4336	529.558	2741.46	855.854	1630.29	241.995	678.554
912.968	460.526	692.283	56.5763	421.198	52.0457	375.338	1392.89	567.858	1311.02	432.287	725.304
531.562	419.491	603.333	67.7675	326.321	52.0151	549.443	2621.99	552.949	1641.09	370.569	482.498
671.195	416.089	639.981	59.2314	272.133	49.0561	434.345	1861.42	2823.86	2483.04	247.286	1083.77
884.507	424.389	767.977	60.119	279.176	39.0053	577.36	2387.22	2399.78	2645.92	633.595	782.352
1028.62	509.878	634.582	60.2755	335.991	48.9669	551.995	2337.78	370.351	1063.33	691.672	858.808
427.37	298.603	838.08	64.4464	267.769	48.6239	481.331	2281.19	512.547	639.794	621.956	816.704
625.062	353.874	712.42	54.2229	679.053	30.0134	867.612	2913.26	315.83	914.802	542.724	682.997
749.904	459.701	396.829	63.7622	503.436	48.5477	664.507	2386.49	484.16	624.075	317.78	623.166
1203.17	611.826	571.927	61.4232	314.637	60.0385	475.262	1906.4	570.138	612.958	285.242	702.505
599.429	330.436	498.913	43.7097	245.745	59.276	1248.9	1330.24	407.929	1103.78	350.149	716.119
702.325	280.964	662.825	53.9792	287.269	60.2034	548.377	1302	638.142	1102.97	357.74	811.298
648.275	451.414	607.976	54.9922	272.776	55.0671	306.849	1646.7	576.59	1704.31	402.496	794.623
567.335	330.224	582.415	63.6776	350.453	68.9594	276.456	1744.23	879.18	1506.46	420.872	949.701
430.949	408.058	570.562	57.8651	306.022	76.9852	279.868	1639.2	401.97	1621.11	382.934	990.84
786.93	310.713	605.499	57.5993	340.402	68.8247	714.083	1307.78	2610.97	2325.74	381.964	481.447
400	385.615	485.909	65.2792	376.052	69.069	461.439	976.644	1022.81	1437.65	543.88	762.074
468.612	402.712	773.892	58.1059	301.065	85.8841	406.725	1516.71	759.354	962.183	408.785	781.312
492.324	306.029	621.721	91.523	430.798	60.1148	698.285	1472.67	766.575	1038.42	345.731	1159.96
788.674	527.998	676.539	89.401	287.991	62.3419	667.042	2388.28	899.603	786.208	334.41	896.092
632.528	335.016	683.216	116.837	293.538	61.1415	383.981	1412.51	1063.48	1338.88	553.11	760.204
590.153	426.25	620.365	101.18	467.662	66.6134	550.637	1052.01	582.63	713.673	357.336	921.936
627.789	422.128	652.125	87.6397	294.026	57.3146	920.313	2328.75	425.791	1233.75	371.457	671.739
671.413	371.556	507.129	81.4503	318.046	56.9448	414.464	1297.83	421.554	585.471	653.235	1105.6
642.82	459.693	1214.07	77.4203	277.836	58.7493	590.008	1126.07	2039.4	2376.73	534.052	755.875
631.955	459.712	570.33	68.5769	254.701	56.4701	484.63	2838.8	2089.87	2442.07	359.302	824.203
891.544	373.015	430.98	97.2733	317.966	58.9772	509.59	2451.53	764.929	1677.57	357.878	934.783
718.002	425.526	594.458	94.6352	388.311	63.4211	366.467	1889.94	427.325	1918.68	340.281	504.125
794.307	406.238	616.899	76.7317	356.696	61.5304	436.671	1342.68	1056.65	1416.53	362.666	288.777
856.753	491.206	558.694	66.9526	314.501	63.2286	525.39	1695.48	1255.5	1800.12	402.209	476.047
741.335	603.75	579.378	70.3538	311.291	66.8837	1613.08	2691.05	869.385	1579.6	291.152	282.863
1144.67	478.656	605.56	87.4757	294.908	67.2174	2666.19	2764.85	2619.24	2952.19	303.87	439.647
563.227	279.252	875.496	89.5517	381.472	66.1188	2541.56	3365.22	1256.76	2402.67	351.978	549.065
534.493	421.647	525.389	70.3932	323.234	56.8731	1785.84	3051.59	2760.57	2821.06	374.384	333.003
608.339	203.896	596.563	79.4293	355.372	63.8605	2599.47	3528.87	671.868	1411.48	533.888	605.281
573.524	298.807	940.342	80.7904	377.616	39.4143	324.229	1776.65	2762.44	2725.88	409.973	486.298
652.129	304.174	545.987	78.4359	434.958	48.7141	327.791	872.397	787.574	1440.02	387.755	391.289
626.681	312.492	685.93	85.2635	305.511	52.4504	446.438	1312.09	432.408	489.168	382.71	729.481
488.827	338.612	729.89	84.207	491.166	60.9742	575.725	1218.57	727.905	1559.65	418.375	866.98
517.455	351.169	602.675	88.0149	620.048	52.4373	554.505	1146.5	693.523	1774.9	257.332	304.216
726.072	307.027	621.458	90.005	385.452	61.6652	338.8	1462.62	844.698	1583.94	316.981	345.852
771.059	363.346	543.83	64.9944	314.855	72.8727	331.894	1159.24	511.616	695.726	409.595	1131.1
912.744	485.768	773.626	74.8583	644.897	63.3105	742.942	1847.45	547.775	537.613	651.02	1453.07
698.562	331.633	907.726	88.6684	589.106	68.5713	366.855	1252.59	406.72	621.63	372.768	682.651
687.522	343.554	650.382	77.657	551.364	60.8672	505.141	1433.69	473.042	733.475	344.978	758.024
547.351	376.894	673.477	77.1852	327.926	68.5699	385.075	1061.8	525.529	705.821	404.395	702.487
1236.32	339.448	831.088	86.6198	617.287	67.0473	783.445	1454.81	536.954	643.363	407.564	594.455
752.364	381.285	575.834	83.4964	296.784	61.1718	690.229	1393.77	372.128	1171.51	378.035	1444.92
772.294	370.192	687.091	82.696	835.245	59.6468	544.897	1768.57	437.094	945.38	379.824	779.447
507.167	302.921	824.347	97.9691	365.674	61.9457	938.352	2229.75	909.011	1062.83	576.514	599.434
672.822	288.324	655.045	77.3023	416.883	69.8798	775.502	1753.55	947.699	1151.89	262.883	561.188
510.675	345.004	652.226	77.3038	359.297	72.8273	614.624	1506.23	927.522	780.064	551.752	881.079
577.496	220.171	570.819	84.3133	428.686	64.3278	730.281	2061.82	480.662	545.031	325.293	1234.26
593.606	258.711	609.687	77.6197	346.276	63.1295	612.577	1584.35	486.967	534.57	246.887	779.356
563.685	243.5	671.165	74.8171	826.491	68.6622	1717.08	2445.84	1946.79	2229.86	251.566	698.024
733.282	262.566	779.597	82.7027	292.497	73.7268	356.988	1382.27	681.681	1530.19	479.729	1046.19
724.462	355.647	508.886	102.514	782.093	70.3648	730.141	1096.59	497.67	1540.66	242.709	1483.69
610.723	361.911	608.086	96.7024	487.815	75.793	450.977	2111.25	546.553	1723.08	320.351	1270.21
589.996	371.226	718.243	72.7796	987.009	69.8724	616.148	1775.63	1149.63	1033.82	321.353	721.294
745.881	312.602	725.316	98.2049	482.979	76.3321	782.248	1995.91	835.551	1549.55	278.818	392.161
542.153	379.071	1047.14	71.0115	511.25	72.7858	590.349	1191.28	515.878	1281.82	441.464	715.277
703.939	358.561	629.008	78.566	487.515	72.5642	566.591	1180.32	514.939	1619.62	498.011	629.04
480.693	200.96	599.997	86.3367	396.029	77.5255	391.077	1468.57	2848.32	2095.34	380.897	702.743
519.194	252.675	708.866	87.1648	419	98.208	378.234	1761.62	292.667	1192.19	569.46	706.026
520.664	227.16	696.562	93.9546	449.451	72.3825	573.834	1097.24	484.417	678.225	477.323	950.175
726.723	305.333	623.741	71.6168	528.188	117.122	881.619	1341.58	559.303	1250.69	525.501	949.787
508.032	280.167	593.758	83.1114	557.333	97.479	343.927	1001.78	605.053	562.168	579.409	1123.54
515.761	230.269	529.877	67.8877	840.261	73.7918	730.905	1057.53	486.353	670.916	252.697	770.94
654.515	342.92	485.636	75.5333	472.256	79.5709	1102.82	2076.15	237.595	1049.96	241.102	811.6
588.555	344.661	519.573	101.444	324.537	71.5432	587.775	2388.55	400.352	987.259	649.282	696.767
774.674	326.406	539.414	97.0897	275.045	66.9254	567.939	2095.76	489.421	817.002	305.51	562.537
662.138	280.111	1067.59	61.5103	325.865	69.6807	540.166	927.86	504.199	1039.99	295.287	455.652
502.895	205.599	1919.96	70.2446	407.064	65.8716	421.532	1951.76	1198.86	858.909	267.776	527.399
626.284	328.344	1362.47	68.0279	341.85	82.1324	979.508	1810.74	299.88	843.123	270.128	779.715
659.077	301.414	713.451	52.7418	238.326	71.4743	735.261	1033.21	271.463	1128.46	453.376	1057.15
683.327	299.269	1029.79	52.6508	438.48	76.6779	395.882	1149.5	449.058	874.391	315.648	758.905
515.847	278.943	690.026	55.9254	480.263	84.8564	686.649	1113.06	420.049	802.951	257.774	1180.59
529.504	311.008	604.483	65.3339	509.233	79.9488	525.267	1211.32	728.89	572.279	645.206	1162.25
968.069	240.016	538.407	66.3505	348.025	67.7085	1091.08	1601.47	483.32	762.808	365.211	919.943
889.739	258.884	557.237	60.7767	459.429	92.8904	1166.82	1162.16	350.921	1199.8	239.109	1531.33
672.943	334.149	908.1	64.9183	283.962	57.9691	823.409	1239.75	603.104	848.046	323.911	991.009
695.858	268.9	512.976	66.3513	318.125	67.3837	896.376	2265.77	331.595	1091.53	409.121	755.606
542.986	209.551	555.11	60.2706	440.484	52.1665	778.14	1288.87	329.025	750.758	380.149	850.321
510.888	224.637	642.808	83.283	305.64	66.354	450.348	1593.5	552.181	1224.74	365.121	748.461
570.796	242.435	618.625	54.6679	345.986	78	515.571	2581.24	431.383	949.814	357.37	1026.92
496.667	216.138	529.8	59.84	531.856	84.413	494.369	2053.7	336.541	940.753	402.42	847.773
516.418	235.11	613.153	71.2359	581.152	62.7414	588.772	1208.69	707.708	1671.21	447.456	1043.39
583.385	208.79	468.29	65.7524	396.848	72.4177	1486.25	1826.4	1988.32	1925.98	266.899	821.076
746.047	210.665	857.962	83.9907	313.906	82.2717	584.736	1042.15	784.302	1159.33	331.724	902.922
739.856	174.438	618.236	57.5142	313.631	77.5879	760.788	1552.89	1203.96	1602.91	286.493	775.22
931.48	219.298	653.89	58.9023	290.274	71.9553	1349.89	1710.85	439.303	521.893	270.109	866.135
513.392	194.127	719.636	73.1444	357.603	88.2483	755.198	1519.35	475	1141.43	244.451	690.625
563.446	169.95	535.593	61.1448	315.777	80.0393	714.31	1797.92	503.96	787.665	492.63	1045.48
709.516	216.573	622.131	72.3641	639.951	93.5963	478.467	908.143	449.943	634.47	251.597	695.902
543.738	202.615	974.079	67.6768	845.103	75.8314	783.598	1077.46	244.948	883.792	398.035	812.382
648.463	231.266	771.902	66.6734	382.39	96.4963	676.782	1449.82	410.497	1180.56	431.802	757.471
558.997	202.858	790.651	69.8145	340.707	78.5152	841.156	2406.29	387.504	1392.1	276.232	1459.1
681.305	213.268	560.3	63.4562	449.98	99.2339	1882.1	2202.11	405.046	831.615	349.128	871.219
675.714	194.954	582.515	68.5867	435.936	117.273	497.133	1808.2	449.239	999.121	352.625	667.26
517.116	240.45	657.547	65.8	425.795	111.923	999.398	2120.1	495.866	660.726	258.051	1263.14
601.946	158.842	747.737	61.4068	658.862	151.212	698.051	1525.84	316.978	1024.6	274.912	787.738
671.842	149.676	840.488	59.8936	847.221	126.487	1166.3	1859.24	968.495	1099.32	247.641	535.631
525.911	207.646	880.746	58.5048	933.408	136.593	935.638	1589.84	565.583	962.981	315.054	465.536
544.791	242.568	681.629	59.7339	964.856	139.239	655.727	1625	456.303	963.716	268.184	524.524
565.596	210.944	872.825	65.6926	332	29.8514	809.062	1871.22	316.548	565.19	244.167	1021.68
619.614	189.305	741.693	64.1442	582.121	65.1081	717.335	2608.49	322.556	420.521	410.246	956.054
2265.64	73	650.529	72.8917	896.58	56.6452	720.234	1763.46	302.708	684.193	327.882	989.727
3248.45	91.4342	727.251	68.2012	346.89	66.3839	432.635	2024.79	414.353	1607.73	254.953	640.971
3066.65	81.0412	1143.52	53.676	480.785	61.7496	599.946	888.832	410.018	645.661	334.141	937.034
3217.98	79.3	812.823	63.1164	236.035	64.2087	732.423	958.662	1602.74	815.133	356.479	650.478
2697.67	81.2448	603.553	49.9131	350.689	65.9261	809.402	1040.05	393.983	1033.07	322.496	446.635
2568.82	72.9648	656.713	44.8857	364.57	60.484	497.685	875.787	814.55	788.513	279.839	723.724
2887.25	86.0103	575.205	47.4515	340.794	54.4119	674.151	1793.33	558.602	867.963	259.844	797.502
2232.26	92.8519	645.028	55.7105	296.394	58.0944	393.424	717.025	437.844	917.089	238.507	851.428
2939.17	96.7549	694.98	61.0402	324.858	57.1959	494.87	767.962	567.627	823.608	314.615	1166.4
2424.2	95.027	873.872	57.7154	547.003	76.873	960.584	1932.56	415.782	1205.52	321.398	809.44
3237.41	91.3268	548.944	55.3221	700.227	65.5153	1139.45	1330.81	926.894	1301.96	308.998	483.904
3224.37	83.1585	543.761	58.2888	348.586	56.053	446.153	775.153	459.24	851.892	305.359	622.736
2036.42	114.849	532.405	54.6805	338.806	52.0145	863.925	1072.85	668.503	874.445	276.79	413.266
2578.09	126.761	462.56	43.4259	483.666	50.1835	916.922	1746.22	450.951	1160.12	349.249	824.856
1868.53	114.412	644.409	60.9195	528.609	51.9192	896.632	1929.19	763.824	2173.86	250.973	457.499
2430.39	111.498	807.352	52.1372	237.218	47.5128	433.716	1161.07	572.825	1369.32	296.859	857.268
2145.27	84.1481	601.697	58.0712	446.88	53.6275	617.902	1242.93	406.457	567.954	274.099	1139.78
2709.97	99.8677	758.594	57.8316	327.481	52.6889	436.53	928.936	482.416	910.766	238.858	368.755
2807.14	107.808	612.855	59.6575	234.182	54.5182	449.716	1275.04	610.827	1123.91	245.147	869.758
3104.44	92.3372	800.525	56.0995	459.08	58.4526	599.118	821.412	571.024	1058.31	337.456	544.979
2488.48	83.5636	890.054	59.966	333.522	49.5	791.824	985.516	635.938	1280.25	306.548	767.207
3390.71	92.2	705.423	59.2853	311.717	48.7649	573.229	1587.7	937.863	1338.87	295.299	996.215
2147.4	87.4727	796.056	56.4781	342.88	55.241	451.554	1454.91	854.923	1289.18	459.682	782.775
1412.7	65.9153	683.321	55.8705	357.71	57.7067	468.124	1053.01	674.901	1238.85	365.776	616.94
1795.59	104.437	857.897	52.6157	375.814	46.7514	607.433	1057.45	480.24	762.576	246.564	372.722
1440.82	119.616	732.867	50.9778	387.053	50.933	443.82	1284	530.321	903.314	232.465	308.592
2158.94	80.5484	673.683	55.2196	488.55	55.7987	397.293	1179.59	450.328	743.094	408.924	445.386
1515.74	62.8824	999.166	54.5043	330.07	56.7604	523.331	1468.32	402.43	986.07	447.05	769.164
2021	69.7316	729.617	47.1596	576.195	54.0087	558.147	1918.82	726.01	1312.55	323.294	704.131
590.017	53.322	636.301	52.8026	445.964	50.2993	373.188	883.372	359.589	1048.86	321.065	1117.76
1048.18	107.283	575.902	56.0813	301.351	56.7417	1527.76	3138.78	338.597	987.569	383.34	691.236
3925.5	218.206	726.095	56.7243	401.517	55.9541	1408.26	1908.94	380.272	885.86	497.796	1326.7
3965.47	214.297	719.558	59.6538	426.653	60.2141	1749.91	3099.91	819.996	935.063	312.168	709.058
4061.15	224.654	705.362	55.0862	523.141	57.1155	1340.99	3742.91	380.916	1055.89	343.515	799.967
3577.55	204.056	947.691	57.3798	629.449	65.2496	2103.75	3767.75	533.521	749.245	237.594	746.019
3800.31	206.968	906.833	57.599	697.915	61.3134	2503.31	2954.55	832.126	1398.02	252.435	797.078
3992.29	193.845	827.647	58.8449	480.372	64.0668	2831.37	3724.6	860.093	1297.33	367.827	821.1
3353.21	207.93	1038.74	95.6631	495.377	28.719	1803.48	3380.26	848.068	1325.63	380.516	602.354
3843.05	193.851	754.795	91.8749	693.333	26.7326	1710.48	2921.83	656.775	1273.53	322.565	470.864
3759.83	200.699	857.354	89.0359	554.077	21.0938	727.952	1064.42	499.382	1011.84	248.285	630.482
3816.16	201.336	985.443	81.3551	383.168	49.0369	583.492	1525.87	1209.82	1622.39	420.941	738.302
3862.42	175.76	815.371	100.863	424.987	56.6608	615.047	1837.41	1691.06	1431.84	252.188	548.757
3274.77	197.358	666.429	58.5497	321.545	56.4314	500.043	903.265	889.258	1445.64	392.754	556.903
3317.5	196.097	579.143	53.087	305.465	55.3739	576.185	833.763	317.413	1065.18	251.235	464.774
2179.12	152.808	731.118	50.0079	377.193	56.1425	458.609	728.943	378.579	1032.1	257.498	958.354
2570.27	176.575	601.969	44.4787	362.984	47.6219	1159.13	1238.46	596.668	980.088	245.136	846.105
3958.1	235.592	490.92	50.0295	404.445	48.0259	859.045	1041.51	668.365	1098.2	234.667	1027.34
3930.53	220.861	662.341	61.7568	296.367	46.1077	447.534	845.276	550.674	1224.91	247.918	1005.72
3679.82	222.079	653.956	62.9393	413.678	50.1499	304.083	813.775	674.42	1135.03	278.391	1161.47
4043.15	234.098	846.281	65.1424	347.136	51.676	558.34	943.671	507.305	774.976	245.027	271.973
1254.53	127.625	1018.68	58.1125	247.092	44.6582	397.577	982.876	360.801	1782.43	387.705	409.03
1429.76	122.562	588.668	59.276	231.048	39.9384	424.761	986.638	932.415	1455.13	233.715	254.994
172.127	88.7262	1527.46	63.6511	358.394	49.15	403.916	1225.2	2047.51	2037.63	326.111	311.121
149.737	49.3832	729.202	58.187	280.322	51.212	502.594	926.303	429.777	699.656	236.656	392.974
131.696	72.5978	621.15	75.1667	279.552	50.8319	480.159	1000.54	654.457	616.588	333.149	559.406
197.039	64.3028	614.855	90.0368	284.236	37.5905	334.627	1050.74	1093.77	1318.43	491.31	1062.45
160.347	56.84	548.763	68.223	412.712	39.7158	313.711	1435.8	538.781	1308.45	509.254	1077.32
152.771	72.9071	795.328	78.8626	299.517	44.8517	307.269	956.641	460.889	1091.32	410.124	1060.8
155.359	76.7183	957.532	67.5554	336.116	43.9207	357.106	870.58	669.159	842.999	433.531	621.208
147.488	71.2442	1211.69	64.0054	393.664	38.083	392.008	1542.28	425.785	1133.96	386.662	735.359
270.153	95.3028	660.63	89.5943	389.746	39.6746	364.951	961.367	431.771	959.614	366.613	699.878
166.95	83.4964	490.604	62.6813	330.726	42.5445	334.87	864.716	418.903	868.949	365.387	931.13
267.086	98.7704	769.174	67.4224	449.865	39.7601	520.081	673.54	427.895	1519.51	277.997	985.326
150.355	72.7473	576.358	59.7615	276.601	42.1084	424.456	1062.13	451.1	1487.08	333.931	966.126
163.085	97.4207	754.493	68.3664	420.114	40.519	693.808	705.093	504.215	1011.21	387.238	374.024
236.162	112.043	548.295	59.1307	364.455	43.3101	592.576	940.956	692.666	1354.9	793.866	861.531
190.615	69.9202	783.02	70.7256	356.711	50.4592	562.871	3099.55	400.347	479.608	598.346	694.041
134.605	68.5814	571.198	91.3015	340.191	32.3961	485.343	2169.01	354.651	915.719	568.906	664.548
135.669	63.7444	990.908	66.7866	469.154	48.7651	637.452	1587.68	506.561	1498.79	488.521	700.39
164.683	69.2788	608.591	60.4879	507.062	54.0474	467.941	1677.49	609.242	1154.89	301.279	956.673
206.092	70.7406	509.684	67.0452	433.787	45.2454	856.268	1804.82	912.986	1291.92	393.699	795.124
245.653	75	612.755	77.2011	313.669	50.3675	1411.82	2366.68	579.313	1105.25	339.814	1463.49
248.917	65.4854	753.642	70.6605	436.899	47.1966	1621.71	2898.43	737.988	1172.5	360.476	1139.37
286.149	82.2186	678.193	84.3925	386.466	48.0237	1089.29	1451.66	1858.27	3085.21	484.624	943.3
261.276	79.4698	502.396	66.5573	429.383	45.9854	411.667	972.236	2100.16	1786.96	382.239	1017.46
187.4	78.875	600.652	70.0971	366.221	54.7224	572.772	1082.84	1303.83	1368.42	399.489	1156.64
177.833	68.7344	612.23	77.7889	522.072	45.8271	589.208	2584.08	1904.05	2105.13	460.643	742.561
255.471	71.9245	693.251	68.4168	570.602	52.7764	702.623	1036.72	461.429	1813.58	415.835	1080.11
293.872	76.4433	708.985	67.278	400.845	49.9007	595.669	1060.11	1333.03	1840.53	317.654	890.456
236.403	82.4171	557.545	73.4574	449.466	51.3868	365.826	690.533	1254.78	1979.72	359.253	708.919
312.164	85.918	583.413	70.2907	284.275	51.7083	709.115	901.771	2710.77	2151.24	333.753	641.632
290.701	68.6068	778.785	65.2767	794.242	53.5439	725.362	2264.14	2403.96	2651.54	334.063	528.666
216.24	75.375	1161.12	50.5495	995.493	56.6159	611.128	1183.5	729.969	1465.56	275.617	673.383
280.556	80.812	994.851	49.9463	360.578	52.6024	616.174	958.155	677.775	1685.41	261.83	707.953
326.174	87.3284	586.108	47.207	646.688	56.6825	624.355	1178.29	596.431	1136.75	419.702	559.693
242.241	89.875	630.305	50.4391	399.095	51.1282	581.27	843.358	564.335	959.304	309.149	556.845
315.222	88.3834	724.126	48.4718	485.426	50.8665	594.631	785.513	1154.62	2085.04	430.729	613.825
458.221	80.6342	1080.77	59.7775	693.935	53.5617	595.403	1658.64	797.87	1588.63	362.444	880.306
229.293	87.8623	532.193	52.7268	473.13	21.6667	423.312	1037.73	689.51	811	430.219	895.629
236.816	87.7482	1038.42	55.993	493.286	34.3409	566.124	967.966	487.86	533.339	472.753	671.814
277.537	84.5676	481.149	56.0518	499.802	20.6522	347.527	1120.17	399.378	1092.48	332.716	806.616
252.493	96.1231	1271.88	52.7822	1168.86	47.9454	816.862	1167.84	390.162	653.673	553.068	1277.58
247.877	99.2866	665.569	48.7945	685.734	43.4626	1087.28	1472.36	585.85	1062.32	283.336	695.732
263.251	79.9548	718.603	55.9206	647.95	51.4441	624.644	1064.32	457.81	1019.96	483.848	920.046
197.251	64.1571	587.754	57.5	536.395	31.0341	590.622	1488.1	696.577	941.951	581.313	1178.96
178.488	73.4453	662.487	55.8728	600.01	28.406	717.429	1331.84	615.522	1128.14	351.801	1277.55
189.479	117.5	720.214	53.1078	1649.54	34.2097	639.564	1157.44	477.642	1067.09	471.248	1312.91
244.255	88.2351	872.615	53.9399	461.484	67.3836	576.003	2097.4	810.821	1303.34	505.084	1173.66
173.576	71.2235	609.982	55.059	569.544	16.2097	592.945	1350.53	492.957	665.925	357.208	1070.82
255.793	79.3778	1000.05	57.1482	418.386	37.2381	456.771	1268.18	781.941	1068.58	491.306	950.381
144.171	69.1707	878.009	55.9094	1289.45	58.8997	789.215	998.213	2539.51	1894.77	423.817	835.116
169.18	82.518	894.797	55.3387	892.037	65.9632	469.355	1221.3	356.592	1682.66	617.66	1431.61
145.627	82.3007	773.027	62.6396	1296.93	55.2878	593.205	1062.96	789.332	1624.73	555.748	1229.06
219.063	104.732	830.186	57.7481	1220.93	48.228	533.787	930.704	1699.95	1517.04	418.439	834.927
192.72	114.537	912.421	58.505	1458.93	61.5561	991.668	1281.42	589.241	1595.63	571.019	875.02
216.671	87.2708	1044.05	57.222	1231.88	33.9689	665.054	1179.25	2240.99	1757.11	451.954	728.448
192.474	82.9477	723.091	56.0953	586.532	55.2785	788.916	2830.89	1996.29	2521.05	289.844	472.078
148.753	94.3506	971.192	55.398	1518.69	58.4038	473.64	1617.2	551.112	1581.02	365.984	716.28
172.636	87.0795	1138.39	54.3985	1679.8	58.6248	367.172	1203.28	987.742	1486.19	374.552	879.895
261.315	104.941	637.498	53.871	671.178	67.825	402.485	1330.87	519.571	938.408	390.077	1143.86
181.542	98.7352	790.65	57.0209	963.879	59.8274	889.265	1061.28	717.118	944.956	375.839	971.298
211.539	83.8927	704.027	55.5307	349.814	47.8099	417.515	966.224	653.556	1629.33	585.584	1173.08
205.568	107.093	773.87	55.5316	409.104	75.505	899.008	1531.02	758.275	920.931	536.084	865.037
228.478	86.0964	806.918	54.5661	304.862	73.4605	350.27	1109.41	445.86	584.483	400.901	999.316
171.48	87.4309	734.72	71.6868	649.4	70.2159	724.398	1118.93	728.437	945.239	350.105	1235.65
259.917	91.2479	1026.24	71.2033	920.907	72.5556	1291.25	2716.7	809.425	796.361	411.781	1047.96
314.553	95.9559	763.605	63.4476	912.067	61.6425	797.643	1675.11	605.586	1492.35	381.361	830.897
483.529	101.629	911.031	55.1239	537.364	61.796	810.899	1622.11	473.324	619.059	292.311	1566.26
422.815	108.771	797.049	71.8765	359.366	74.5587	825.56	1493.15	361.272	552.908	446.465	808.343
279.114	89.5078	744.213	69.0985	436.932	43.4872	507.554	1554.46	332.597	721.83	282.114	1133.2
299.892	92.8758	916.746	64.2392	305.817	44.8763	653.969	1490.42	314.839	1260.78	307.81	797.561
337.204	104.483	911.059	62.5189	448.775	60.4475	1415.9	1641.38	310.996	1113.74	264.124	716.706
264.57	77.9469	809.564	58.5776	370.352	58.1321	419.785	933.914	348.819	945.903	457.684	1049.61
263.78	92.1648	690.61	59.1359	414.586	64.6504	421.466	1259.75	425.051	988.502	257.053	708.424
326.267	80.2067	714.207	52.3618	464.804	30.7634	528.775	711.747	358.395	887.315	271.306	623.48
250.79	107.748	670.715	58.7904	423.247	60.5923	702.915	1200.95	492.076	973.238	295.626	806.715
253.924	83.8667	808.106	59.2768	673.226	53.0301	749.403	1710.99	299.552	1307.14	230.545	616.055
239.427	83.1685	519.684	56.519	291.398	47.9368	682.751	1240.32	364.341	463.034	237.868	550.906
902.776	163.656	479.415	59.8041	369.517	46.0602	580.523	1221.14	597.809	736.012	237.592	670.815
298.19	81.8247	861.956	66.9158	403.043	47.1978	387.5	1130.71	1614.19	2029.47	577.584	599.994
327.278	75.1899	963.167	83.2339	356.557	46.3979	1033.07	1336.26	317.957	1105.67	515.918	548.335
271.341	89.9058	631.834	61.7841	304.429	50.2902	506.339	1042.99	326.717	1146.58	341.012	455.917
309.996	84.811	948.475	61.6554	352.567	48.5397	595.919	1092.21	1365.55	1873.69	546.898	1020.7
3990.9	147.137	681.934	74.6314	312.183	41.8122	827.518	1589.17	877.966	1356.45	485.403	1133.9
3940.4	130.5	883.599	69.2383	407.203	53.8881	398.354	1300.84	1490.12	1727.46	553.516	1054
4035.61	140.04	585.224	72.6677	395.959	49.0568	954.212	1511.36	487.225	552.005	514.422	1168.84
3962.57	132.651	623.7	68.6732	414.353	52.026	670.932	1337.59	353.562	925.985	714.234	1049.15
3933.57	154.019	899.565	68.6791	301.543	57.3	730.535	1096.67	500.947	944.71	567.119	788.753
278.976	76.5054	814.749	62.733	321.323	50.8468	353.927	1025.84	443.453	920.492	437.144	887.398
178.086	73.2368	946.377	76.823	365.796	55.0268	341.261	1277.03	642.205	1014.47	628.378	1244.94
245.51	207.966	681.916	56.6734	263.6	63.4556	593.559	1590.5	287.975	1218.07	490.925	796.723
307.13	120.61	812.188	72.6955	362.243	56.2602	1287.68	3465.13	434.08	839.816	513.426	854.753
301.219	80.0814	784.663	69.7639	617.734	59.0596	690.543	833.365	391.462	875.993	376.256	941.681
189.704	75.692	833.363	75.6391	562.355	35.2164	595.977	1065.09	615.688	782.262	310.886	699.461
280.996	106.083	877.401	67.9767	578.075	23.0299	506.596	968.612	424.911	805.282	351.456	914.656
241.353	97.1155	619.835	62.155	500.629	26.3096	417.195	833.591	509.52	539.602	387.933	945.391
226.829	87.6238	681.749	65.6066	313.901	59.87	746.929	1169.79	338.01	573.189	305.617	1027.86
287.36	110.624	737.293	63.5219	436.441	56.0075	686.175	1288.65	456.404	841.762	457.393	832.531
166.261	113.216	824.532	74.7341	513.562	55.1673	473.342	799.386	342.055	835.5	484.216	445.104
252.956	66.3309	1024.99	83.4304	460.638	45.9171	459.256	1095.25	536.727	700.79	306.152	607.2
153.98	57.0898	687.308	71.449	311.665	44.5717	482.739	1977.85	434.873	1391.2	292.09	606.305
181.544	63.3722	834.07	67.9631	261.392	45.7568	427.98	931.293	656.028	776.308	313.315	324.336
307.302	78.5093	816.552	67.73	380.114	46.9957	399.438	1250.93	457.131	927.634	433.975	702.21
301.963	68.6172	576.55	79.5994	234.239	75.7676	455.603	1220.4	367.649	1004.29	351.925	986.521
282.238	72.3926	786.482	72.5308	400.59	68.6791	557.058	850.341	710.505	1089.57	330.137	1193.07
232.582	74.3147	684.072	68.5858	322.373	65.2052	409.387	939.075	381.967	1049.16	317.792	701.269
202.312	66.8077	845.354	71.6962	453.535	57.7299	365.53	976.009	767.626	853.644	360.454	1000.44
201.488	74.3088	935.731	76.9492	410.31	61.2624	783.343	1349.65	1149.5	888.03	444.329	972.665
277.045	81.8636	625.692	66.6317	309.577	46.57	658.231	1982.67	499.284	392.703	353.566	517.216
318.811	77.1288	591.263	74.1392	338.247	57.8116	505.765	1175.47	525.11	534.859	231.087	399.541
290.549	101.165	893.15	59.0322	404.626	53.1119	445.107	1073.75	307.186	967.811	303.818	633.896
188.414	85.8558	718.873	78.1236	457.029	52.2549	511.947	1633.91	527.917	1337.6	257.173	720.291
231.597	72.3341	861.776	69.599	619.391	57.3072	334.021	837.167	352.496	956.469	321.967	750.51
228.718	65.0619	661.138	56.8598	368.212	72.6394	495.717	1275.33	391.317	908.635	489.38	887.638
144.67	60.0989	582.715	77.7783	339.678	61.7022	371.332	695.486	398.155	559.307	549.049	745.666
154.697	70.2472	739.087	67.8092	498.847	125.095	916.657	1398.22	398.715	529.163	300.175	653.255
265.327	107.101	786.26	72.9151	1053.98	99.2061	692.066	613.723	319.085	792.784	362.736	1309.3
209.608	73.3517	881.164	79.5643	226.962	78.929	931.382	1899.26	430.447	613.012	679.897	1230.92
202.238	69.371	1111.87	73.8098	297.958	81.009	535.934	885.883	606.238	770.577	479.572	1552.54
166.039	68.9503	671.85	72.8595	433.551	72.1861	535.889	852.256	373.523	861.367	466.647	1173.86
258.579	74.8541	1034.97	78.9417	457.682	69.2809	543.444	829.823	321.99	901.808	357.809	981.263
209.286	62.9728	488.614	78.005	273.273	93.6111	399.649	699.13	440.933	986.745	471.226	1035.17
177.622	64.063	856.253	73.4179	320.065	86.0297	496.474	1479.2	286.718	867.676	500.785	858.61
175.118	75.4384	663.335	97.0928	488.536	68.3147	479.981	874.268	598.916	634.628	237.073	713.393
205.066	71.4793	1149.59	70.0298	1047.97	60.2043	496.731	942.69	313.007	485.346	288.357	907.989
207.94	62.924	911.534	82.7006	392.614	51.9981	366.339	766.755	571.611	1480.13	731.407	864.711
247.172	72.668	800.49	89.8643	327.933	48.7903	390.843	991.655	512.84	1339.12	708.019	1556.57
222.644	78.5164	646.354	91.1952	408.37	60.6957	345.497	837.159	600.431	1343.13	573.091	1447.23
255.605	73.9657	900.846	67.4633	449.478	58.456	423.078	1115.66	517.327	553.604	299.36	1878.03
172.645	63.1581	508.033	54.0045	588.668	67.6672	542.844	1024.92	458.599	1110.72	243.096	966.882
197.075	66.7201	524.823	54.2186	352.504	68.2438	577.566	1035.28	392.708	1174.98	274.413	915.142
249.792	65.3794	563.609	71.4398	464.028	71.9585	419.852	1228.7	485.783	707.717	243.605	933.216
1396.66	124.173	448.92	67.453	602.324	75.0084	386.666	1101.52	733.437	706.158	313.452	564.837
1774.83	112.928	671.033	65.8826	449.799	77.0664	454.505	1031.25	454.159	683.547	318.295	653.429
369.807	98.2484	552.752	83.4074	314.325	70.5422	378.227	1408.05	407.663	815.131	358.939	570.92
288.158	73.575	593.962	60.8003	447.933	70.4595	886.17	1445.32	450.581	748.573	236.373	435.53
382.236	120.088	667.471	61.6218	563.618	65.8062	856.257	1249.27	455.444	498.311	253.891	506.19
344.967	131.565	821.564	73.7642	419.786	73.9545	742.203	570.119	474.308	833.3	240.51	640.134
501.738	107.048	635.578	77.0463	618.504	74.5355	777.31	586.357	580.993	1528.69	247.308	543.45
489.227	114.285	1188.93	75.9724	336.33	64.3295	795.237	523.817	578.275	899.92	251.912	459.849
406.385	99.0337	749.98	72.5878	424.494	73.3184	786.035	645.661	581.876	1279.64	299.707	530.741
446.344	100.786	535.931	66.9263	305.467	60.4978	748.507	1421.57	474.729	742.257	328.134	879.807
382.118	88.4583	996.69	64.6724	506.507	68.7921	1198.34	2237.13	1079.58	1193.17	270.391	650.017
427.533	94.2566	486.496	277.034	468.846	69.6842	355.163	1214.77	384.71	618.073	287.502	605.882
594.998	104.118	794.033	211.514	372.785	57.3119	581.304	674.715	697.057	1169.74	315.848	1114.58
265.521	83.3697	900.816	204.168	329.863	71.9512	451.595	722.475	652.26	1251.67	305.756	859.98
246.426	100.24	822.58	202.529	385.838	60.838	351.153	699.335	1770.39	1390.78	341.663	895.758
312.728	92.8086	944.954	207.484	465.339	73.1987	455.038	1051.38	671.541	1238.81	422.78	852.276
224.848	83.9963	1244.98	219.151	415.054	82.6942	451.617	946.612	896.554	1225.95	463.018	525.679
287.19	91.2852	528.546	190.399	532.207	78.1265	411.504	1335.99	423.648	1013.23	459.908	1682.66
330.486	104.655	1162.95	164.517	553.131	70.7774	697.589	2195.41	1451.28	1265.84	279.556	523.252
311.234	112.604	823.117	206.889	554.132	75.8389	877.962	2809.3	595.9	1099.08	399.44	1239.03
299.42	109.615	531.694	170.529	586.168	71.6069	654.049	1694.33	504.64	680.434	292.803	685.481
217.663	84.6386	1161.97	214.218	715.787	62.4131	767.882	1607.89	651.867	722.237	465.237	724.336
301.716	76.6507	466.662	221.529	631	64.3616	740.387	1738.76	618.229	754.399	267.5	818.105
308.176	75.7415	723.724	165.724	530.637	66.3286	398.933	929.821	797.212	1511.33	505.944	656.491
231.932	87.5982	1506.63	226.033	705.159	62.4007	445.922	1040.9	774.561	1361.45	288.879	1231.04
392.799	89.6562	935.654	157.72	362.516	49.5484	490.335	1020.13	733.646	2020.37	266.211	826.049
338.353	103.953	1266.13	321.468	446.758	69.9954	538.465	1191.47	497.46	609.752	590.688	1078.96
373.467	85.245	1632.56	267.794	677.04	70.0895	456.346	948.472	864.376	687.941	409.126	1164.62
393.099	95.2433	1283.59	285.925	657.848	60.6994	698.337	846.021	741.028	871.137	517.704	968.997
142.564	76.428	564.02	264.648	476.571	65.3215	423.265	2346.42	666.293	910.584	257.552	862.35
215.641	88.808	932.399	163.835	568.289	66.8026	508.318	883	705.628	1143.7	507.359	868.489
151.591	78.9511	538.046	190.303	508.21	62.2456	456.758	1569.35	973.994	1085.33	269.098	921.014
94.6617	69.594	632.197	244.431	689.729	74.4045	590.987	1827.46	981.289	1111.52	403.047	856.713
102.512	79.7679	783.284	188.048	326.175	70.0714	468.694	682.802	1003.67	1242.42	245.504	719.031
109.458	96.6684	1212.37	266.242	576.286	92.4108	366.364	1426.59	1239.9	1756.67	407.756	998.944
98.54	104.24	791.392	238.401	446.485	69.9253	680.999	1095.93	551.786	916.081	440.046	1407.35
106.321	87.6132	606.067	182.793	545.363	77.2905	464.494	895.942	431.386	712.577	320.663	822.655
134.392	116.113	756.05	187.118	434.433	68.6873	411.896	1619.23	387.827	1100	265.152	379.596
110.851	71.3231	1250.22	230.091	447.774	69.6091	451.27	1202.29	405.631	1230.62	466.929	784.994
263.119	133.003	814.815	182.044	388.698	66.2532	408.104	1313.62	387.621	1321.61	258.751	499.753
226.278	154.325	610.537	217.851	472.525	75.0056	568.592	1200.54	433.581	1089.46	373.503	740.159
281.95	158.365	982.335	159.083	461.816	68.3083	470.24	953.076	312.971	1197.44	428.444	878.41
410.196	97.6734	683.971	192.477	495.278	73.6991	1385.48	1421.81	295.282	1109.28	495.8	1414.86
529.083	109.679	1237.78	198.332	489.693	70.308	796.599	1121.57	481.32	611.933	311.598	669.585
350.386	81.0609	530.812	199.242	574.817	59.585	663.827	1023.81	439.475	742.781	379.998	1497.66
283.982	189.682	1098.07	227.132	624.964	58.442	477.09	2060.22	422.486	1349.18	333.133	1113.77
525.883	149.086	846.481	223.243	753.951	67.3418	571.109	1487.55	437.315	1186.98	452.711	730.578
378.188	133.823	556.376	168.02	485.772	70.3434	437.364	1217.92	565.615	832.298	526.855	819.739
418.819	130.067	1305.4	240.149	421.906	72.4213	437.713	961.728	541.19	679.292	435.561	855.059
361.703	123.703	1096.75	228.215	437.03	62.5	744.755	1274.79	494.69	1000.93	463.158	692.104
388.181	138.336	1073.61	172.335	385.61	50.0271	496.395	1323.13	646.027	1144.7	301.123	704.656
434.512	158.639	1529.78	231.483	498.368	58.1923	487.516	1092.4	473.023	1145.87	523.039	1163.97
375.259	134.55	886.305	167.793	555.575	63.3991	433.898	1741.26	508.244	1367.89	293.342	626.339
492.655	126.487	809.742	173.106	468.891	57.297	429.493	1818.49	617.526	1036.92	233.76	425.834
363.213	131.811	704.272	200.94	509.995	59.444	499.054	1528.12	426.757	1239.99	771.02	1397.36
493.043	149.877	970.295	210.084	577.456	64.4986	702.166	565.944	321.855	1073.75	269.798	1016.22
325.897	121.134	483.315	256.174	491.093	60.6869	637.648	529.591	381.451	1409.06	595.656	966.723
502.712	141.413	696.17	224.111	463.509	57.4394	463.413	666.515	405.07	1234.03	288.027	836.598
400.899	133.84	601.923	163.889	640.27	72.3165	454.485	414.124	465	1126.72	363.114	1212.32
685.307	120.007	898.684	156.679	478.23	62.9811	471.527	994.155	343.436	1043.6	758.769	983.787
468.95	102.976	701.84	161.37	484.298	57.0376	398.476	1053.34	457.854	1274.27	346.258	850.975
440.481	109.542	694.108	141.026	608.996	63.4659	455.273	803.852	661.852	1195.75	584.547	859.79
415.695	137.348	767.338	148.85	592.294	63.697	331.866	852.361	368.524	689.405	374.157	768.58
455.037	133.442	1126.14	152.646	567.42	64.5773	323.616	1325.55	781.138	1155.67	307.615	776.54
368.876	102.607	541.068	194.785	437.5	63.5783	314.671	685.794	360.078	409.333	300.204	752.387
319.156	126.769	938.463	163.093	417.179	57.9049	416.213	648.381	301.615	1100.46	540.146	699.285
421.005	102.014	578.79	206.694	414.653	71.7991	385.26	674.126	315.782	402.667	344.8	303.118
398.237	114.11	708.187	164.783	439.01	65.954	358.779	650.355	513.305	488.429	285.89	491.316
386.456	125.814	820.736	179.375	725.961	66.8711	408.679	749.123	270.439	588.589	252.374	539.626
494.45	148.804	1032.78	159.139	333.401	66.3213	461.659	1612.43	502.027	1072.16	685.061	1079.27
444.427	124.054	1157.42	214.422	505.979	58.1109	362.551	1314.53	447.586	516.583	336.798	1270.34
371.703	140.508	1237.62	154.417	574.029	58.3796	318.477	1316	544.677	567.344	442.548	718.98
437.28	138.533	865.056	146.838	742.807	65.6313	379.219	620.651	558.599	1206.13	474.013	617.806
318.402	121.078	1226.39	212.592	666.232	61.9594	376.008	1077.83	729.116	1359.91	471.602	1041.92
397.327	130.704	1229.79	225.94	359.323	63.0729	551.723	1117.98	623.886	795.276	351.337	937.199
423.061	143.821	1009.6	166.804	547.49	72.1941	339.489	1225.57	2315.12	2511.71	353.118	562.878
501.157	156.876	955.758	237.317	588.143	54.7682	668.182	781.71	507.78	887.463	261.372	1135.25
437.026	123.028	684.705	171.14	506.175	59.0742	443.027	641.337	1873.55	2585.08	337.594	1296.91
382.377	125.689	1007.57	180.333	558.295	49.0662	469.804	749.774	1894.36	1415.14	447.884	588.272
440.837	171.399	1078.47	145.359	587.03	64.5994	368.904	547.811	881.768	1600.48	428.764	552.715
368.835	142.303	865.62	204.235	454.29	57.0977	444.336	939.684	847.71	1038.29	420.505	802.799
493.532	128	931.173	201.182	437.657	56.8747	526.709	881.368	803.877	1013.51	320.722	850.43
308.158	114.718	831.43	204.267	451.478	56.9277	419.454	683.244	778.899	881.14	374.791	925.851
396.985	109.701	775.03	209.699	511.346	54.6194	490.707	634.795	377.698	1515.14	354.424	1140.66
340.379	179.252	806.14	183.649	656.614	58.628	390.565	541.625	2826.8	2951.66	759.63	753.81
390.057	109.154	1170.35	235.874	445.582	52.7127	731.414	661.776	1024.68	1535.35	493.117	857.97
427.964	143.366	1198.9	167.301	554.765	57.2841	739.05	1120	911.96	1745.39	557.876	790.534
332.176	102.504	1665.49	246.912	651.069	64.9632	609.335	666.237	895.105	1045.12	370.477	649.731
376.674	132.358	563.792	169.072	385.892	57.4112	595.572	675.043	827.039	1362.81	421.232	725.222
362.382	133.993	1020.95	239.87	726.04	64.7127	348.965	640.993	779.059	1143.24	367.31	1178.44
368.702	152.097	795.188	199.372	588.946	72.4749	355.037	519.485	894.068	1551.67	392.956	932.384
323.72	122.048	1020.91	230.965	426.434	65.1636	576.465	732.098	2214.14	1945.33	362.51	594.048
360.745	135.063	610.076	216.394	653.367	63.4071	724.359	889.804	1296.23	1147.62	331.155	1088.99
271.607	190.538	822.336	214.295	658.373	67.3839	403.938	622.863	775.764	847.399	367.384	1041.06
361.661	149.761	764.42	185.367	417.624	67.4918	472.227	921.116	1490.67	1713.32	462.419	1034.08
390.182	178.168	1749.36	245.354	544.069	67.675	805.586	791.832	403.095	1334.42	315.361	1222.06
410.369	98.6018	1064.13	175.375	538.133	75.2126	560.682	1005.34	2205.45	2529.62	319.575	1143.68
445.798	86.9844	539.032	183.615	455.628	63.8245	409.166	711.549	868.548	1164.47	322.968	1334.28
409.187	110.815	1062.69	250.562	430.887	67.3795	532.031	799.307	1328.06	1606.66	252.195	985.316
370.972	109.55	697.756	168.038	618.749	75.3095	540.146	1941.05	341.875	568.416	458.113	817.946
280.701	133.768	734.823	168.42	591.851	67.6228	877.514	1106.34	530.243	1083.13	252.35	912.854
411.649	115.228	1023.25	217.178	500.238	66.0812	545.384	1164.74	828.045	2035.9	490.331	1023.59
353.786	105.661	1329.43	208.685	575.008	68.054	526.951	933.416	628.554	946.156	234.283	547.62
411.401	101.261	1097.32	223.212	449.866	66.1185	361.581	891.162	538.319	617.67	339.917	1081.64
469.363	191.953	1283.06	208.268	546.184	64.8588	341.127	788.86	434.812	1043.12	317.594	846.186
470.477	100.414	535.81	191.319	410.437	79.9592	525.581	909.062	522.636	1340.77	381.329	535.006
471.19	106.214	1137.26	228.395	462.416	63.0512	535.468	880.065	747.036	1610.62	239.995	549.649
426.731	109.699	1491.31	181.204	547.543	56.3887	651.549	689.935	615.722	1571.79	329.315	1115.41
366.741	99.6625	1293.26	252.518	533.556	59.1396	504.497	655.63	279.282	1087.59	246.678	753.965
420.121	158.911	670.418	175.301	443.455	73.0656	516.272	993.316	485.669	1220.26	251.975	956.93
386.127	107.032	1692.59	195.264	541.872	59.667	655.008	2292.18	270.391	1238.45	231.051	702.663
404.365	106.002	893.025	210.545	337.622	55.551	420.555	1746.33	349.995	880.332	368.975	694.46
278.806	115.087	849.731	222.103	584.576	70.0144	492.176	792.268	403.313	779.336	543.207	862.324
342.524	90.4457	1850.12	234.415	667.771	67.1131	664.406	918.709	553.893	841.403	490.647	691.144
360.245	92.7794	1016.02	229.264	612.248	67.4346	588.975	1540.06	287.493	1198.47	713.799	1215.6
460.415	161.585	1399.85	226.019	618.239	73.353	545.144	1213.86	394.982	919.936	421.575	1299.2
438.273	106.366	575.892	211.776	504.105	69.9635	591.767	1125.06	316.565	1559.36	526.71	1674.84
452.589	186.128	690.209	178.207	555.334	63.6552	612.033	1523.13	567.717	1329.37	430.651	540.398
414.471	107.406	1199.27	158.717	325.846	57.0427	659.127	2602.9	372.569	443.614	274.892	525.844
332.43	172.951	1824.84	249.762	468.914	61.6456	545.211	1616.8	521.032	872.191	445.73	522.402
549.422	159.916	1337.77	162.893	400.764	80.1751	641.386	1350.29	713.786	991.171	340.289	535.807
509.638	112.66	1089.16	156.598	504.627	85.0765	461.157	1090.47	428.197	676.544	312.016	1190.18
382.28	130.406	598.174	213.068	379.894	80.2863	401.7	659.747	1950.71	2406.95	268.512	900.622
333.585	138.83	893.026	249.302	428.879	59.9939	369.556	630.492	299.208	1108.01	245.939	752.807
342.501	129.565	1239.79	252.514	455.54	70.082	371.658	560.627	865.062	1604.06	254.032	954.65
333.124	143.612	924.331	191.545	318.419	70.6129	368.845	639.191	322.983	1214.49	322.418	673.759
405.13	161.591	1319.52	264.497	505.596	66.4673	395.561	943.172	1359.32	1660.77	426.063	1102.06
440.539	155.348	639.835	223.628	332.414	69.7705	510.129	611.365	662.513	1111.79	336.537	689.195
353.947	158.253	1230.83	239.125	394.238	74.9821	452.966	1504.1	374.927	1061.44	286.976	773.919
486.259	145.518	997.908	238.282	442.919	61.7759	641.679	841.449	477.766	657.975	348.516	520.843
391.498	136.489	864.084	230.893	349.111	81.2426	417.378	1211.89	428.262	630.522	395.809	821.658
412.407	127.014	813.128	173.343	391.869	78.5	790.325	1971.91	339.395	487.438	416.043	756.186
475.441	125.048	1107.01	248.098	723.795	65.1412	611.971	1651.68	246.26	921.698	403.799	671.215
438.696	127.786	764.214	216.813	465.816	63.0435	288.597	502.539	334.414	500.168	369.976	655.149
439.36	127.016	946.595	252.035	449.396	51.3056	360.24	1093.86	342.558	920.572	406.593	948.49
350.444	227.83	951.898	237.285	496.066	57.8514	455.488	1356.94	497.588	907.986	312.818	781.122
268.845	155.534	1110.69	192.379	465.56	59.2613	662.686	846.835	455.491	830.384	414.629	1019.07
257.367	153.266	714.047	196.195	504.653	65.9919	337.835	940.519	389.047	815.155	385.442	1333.76
353.591	172.302	695.719	197.979	502.164	61.4716	363.449	804.104	529.681	727.745	609.405	908.25
310.966	171.047	1073.23	246.974	428.223	62.8798	477.521	1204.06	340.923	849.244	295.103	1129.66
311.221	201.953	680.801	258.631	331.192	56.2615	425.287	883.058	264.125	594.333	394.596	1054.37
319.719	196.725	828.649	271.644	457.575	69.6456	341.404	904.508	435.153	668.099	393.014	662.944
319.757	132.486	988.355	259.67	456.65	76.7052	355.617	678.65	344.39	686.699	283.836	726.675
386.383	195.723	894.73	186.768	414.64	68.0175	335.05	833.171	349.78	909.338	443.796	1191.23
286.688	171.608	830.047	192.511	411.995	70.4138	386.107	897.901	398.582	619.42	689.883	1459.44
312.568	160.057	1276.4	253.337	390.624	72.7824	360.325	1262.79	382.903	579.724	387.047	803.766
319.081	208.349	731.439	203.185	466.105	74.2439	621.225	597.877	521.002	673.304	294.516	1056.72
366.869	204.692	651.642	223.049	361.17	70.5559	550.866	1073.74	437.413	609.269	487.189	706.094
403.813	163.156	727.47	189.754	542.047	62.23	454.565	777.362	413.155	768.312	380.757	1827.81
382.271	175.248	911.617	177.466	423.553	58.8175	398.421	1104.67	411.766	989.694	560.532	1245.92
530.02	209.539	775.632	253.854	450.592	61.8458	448.196	545.866	692.515	1009.66	358.04	550.107
407.078	186.253	957.636	251.752	444.464	82.1974	480.268	965.697	341.242	708.514	528.085	1518.53
447.92	158.413	744.941	231.634	386.873	67.486	632.433	828.614	302.006	1427.88	467.944	979.163
315.708	138.278	530.402	189.619	379.294	76.4841	386.119	870.499	336.081	900.3	368.401	1449.76
308.725	152.763	788.5	224.526	421.736	66.0941	590.033	2135.17	496.129	721.689	441.775	1100.16
391.721	179.078	771.784	240.196	345.223	54.1429	393.049	918.864	309.867	490.995	683.955	1414.7
425.94	184.714	1022.24	191.045	364.008	71.416	505.99	820.229	336.64	959.337	704.439	892.966
262.919	167.649	930.299	194.892	377.635	54.5912	482.34	790.691	347.264	379.088	366.796	632.569
485.5	148.135	817.109	253.23	364.713	43.6852	711.991	1525.03	382.507	370.831	417.145	772.214
		717.175	172.496	507.008	49.8568	402.15	1094.98	552.731	668.864	669.576	743.852
		715.073	155.375	429.699	64.2812	539.305	834.022	356.38	521.88	369.648	1153.02
		815.949	253.38	348.174	46.7093	394.006	797.53	361.453	661.227	273.235	704.054
		693.666	201.839	368.327	35.1726	381.803	781.8	321.262	752.053	792.342	984.651
		1242.51	247.412	572.425	71.8715	443.78	1793.64	745.504	925.414	590.289	847.561
		1587.39	267.145	439.704	74.6487	477.505	1169.9	403.622	664.353	631.47	819.288
		1294.1	212.336	362.171	36.6325	366.885	770.087	342.594	684.066	283.695	743.802
		1145.14	200.469	360.202	77.0595	373.531	1049.71	331.871	627.739	456.062	596.546
		1918.52	208.684	435.538	66.1166	360.174	911.128	466.819	591.199	408.781	553.378
		1103.57	195.888	502.125	77.6938	470.312	1844.44	555.846	938.825	325.185	722.625
		1771.33	206.088	426.174	71.7989	542.047	2430.73	355.744	1035.73	488.102	890.005
		1132.17	232.75	392.25	78.0727	531.461	1619.67	526.454	1250.71	352.039	1895.5
		699.583	126.485	551.648	58.5084	641.844	999.024	412.86	617.011	441.118	1538.03
		500.348	139.539	619.713	61.9372	509.382	1208	430.425	1308.6	432.255	1354.79
		594.638	153.449	568.126	62.8849	469.819	1845.52	449.971	714.106	279.487	2604.9
		709.052	189.594	479.631	57.4923	655.532	1423.4	492.604	948.667	533.346	2171.42
		724.97	165.244	401.633	62.2063	367	824.21	456.828	718.987	370.612	834.888
		990.631	173.285	631.456	58.2842	426.501	822.069	473.715	924.639	246.693	726.874
		601.289	171.953	443.945	65.5582	691.319	993.409	341.233	1106.7	735.096	1411.83
		650.304	215.17	447.327	59.5323	544.112	1339.35	540.718	974.939	246.097	1871.34
		615.609	199.656	622.843	71.1869	614.387	1059.06	313	660.75	320.408	1193.66
		619.351	203.61	643.48	65.2288	385.942	1064.57	508.58	1127.71	420.561	1591.6
		1084.64	221.201	407.72	63.9244	404.368	869.508	1304.75	1121.51	579.384	1448.39
		853.808	225.564	441.18	64.2712	745.261	1164.59	615.354	874.25	315.389	327.341
		817.179	199.691	729.996	75.0996	469.323	1115.16	307.976	967.956	346.455	1116.2
		1045.11	247.798	592.428	72.9928	476.975	2008.37	668.916	1464.28	312.895	2403.11
		594.914	160.364	428.82	62.0476	446.967	898.341	423.492	713.626	378.31	1376.71
		576.478	169.804	430.438	76.0274	548.825	878.629	854.174	1348.43	425.144	1600.74
		1561.86	259.158	350.331	78.1024	660.499	1445.69	1343.2	1775.25	406.319	1460.74
		1495.84	309.966	527.575	67.4553	443.681	845.255	2008	2461.68	551.762	2174.77
		775.468	220.98	366.263	66.625	421.399	699.532	532.215	915.924	589.832	1436.64
		1189.38	183.761	446.21	67.8391	582.714	1095.23	462.273	1202.41	335.36	879.28
		883.081	201.463	491.143	61.2633	356.651	662.282	610.995	1053.48	421.917	1278.92
		992.501	211.557	420.061	74.5056	669.78	666.984	570.487	1108.47	714.095	1611.9
		1008.2	274.068	348.038	53.3762	335.362	1370.35	544.024	1210.65	411.362	1438.91
		889.403	255.694	679.504	62.1705	395.555	553.045	753.898	1186.32	424.337	1423.03
		1133.3	184.962	323.548	73.3178	494.91	785.673	543.089	1311.86	748.871	2762.99
		479.65	176.609	544.286	73.3376	826.019	877.042	676.249	942.909	499.686	1730.97
		913.381	216.623	636.587	65.1603	506.089	782.222	426.834	582.176	322.962	872.229
		857.43	175.255	561.74	79.8265	677.92	804.543	375.708	680.993	285.374	841.006
		520.84	170.231	369.31	51.0464	480.54	1007.21	780.097	960.654	264.897	888.915
		971.385	226.556	497.699	59.8191	712.876	999.575	335.635	1040.79	492.203	1426.34
		810.94	186.444	446.46	52.7197	625.597	760.317	314.49	704.51	405.605	1288.53
		911.743	186.913	594.607	60.6709	606.763	509.71	418.13	851.75	414.796	1296.21
		532.726	212.812	446.315	64.4674	350.232	454.773	438.741	855.735	412.86	1081.32
		939.805	204.283	463.404	62.0159	367.446	1363.65	453.722	750.755	372.134	373.223
		883.275	209.5	756.465	62.2831	321.535	486.145	704.057	723.896	292.449	458.44
		1128.3	196.427	616.564	58.425	548.268	830.823	595.175	1299.31	416.728	858.762
		768.111	190.082	387.004	62.6016	495.907	1071.31	783.424	1267.64	326.048	982.069
		984.012	211.759	547	67.8832	443.868	673.733	361.006	817.533	594.612	1181.72
		594.41	160.685	507.775	68.7509	501.149	779.019	2017.77	2264.2	490.637	1034.88
		686.103	237.294	546.912	64.6829	642.489	761.851	417.597	1119.86	489.292	908.881
		681.785	181.699	646.377	64.047	350.217	659.039	424.356	1360.42	492.551	994.984
		648.779	162.35	776.195	62.1215	416.751	764.28	428.177	721.84	341.755	1045.6
		495.95	260.732	634.751	67.3884	684.113	1316.5	292.062	1105.66	395.623	1344.92
		964.877	203.7	524.477	70.3712	324.445	761.441	420.28	956.903	475.763	1026.71
		680.362	180.511	766.615	61.8432	367.335	1055.35	449.259	731.929	266.792	716.594
		822.156	206.414	503.591	60.5519	396.446	923.692	453.458	831.319	384.835	561.292
		809.168	256.637	429.478	59.1248	848.983	1695.16	397.826	1204.03	244.698	518.067
		958.183	241.343	537.302	73.0708	386.37	833.37	421.75	666.538	259.599	654.013
		670.257	144.077	353.573	97.6402	333.725	929.379	448.814	745.864	231.37	819.885
		664.083	151.955	592.203	112.208	513.794	699.072	549.023	757.066	410.043	1619.96
		510.528	157.599	523.606	117.929	345.671	682.554	490.613	931.519	284.987	638.909
		679.199	145.006	444.269	129.558	752.382	1764.63	565.365	1121.23	353.793	833.843
		522.11	180.335	452.343	115.18	415.007	1320.06	536.053	722.68	276.453	599.415
		547.579	151.17	400.76	130.28	550.918	944.116	405.102	672.253	420.746	625.359
		860.075	131.621	497.314	87.0426	374.095	1268.35	402.861	805.236	303.238	565.049
		539.017	140.422	529.344	87.3926	406.635	817.59	566.372	882.827	302.784	507.433
		503.106	137.413	491.73	105.236	474.332	1479.44	381.105	691.4	292.895	521.797
		630.058	123.141	485.058	113.17	366.955	730.093	341.492	773.643	676.464	944.04
		704.396	144.194	324.267	103.6	383.728	583.851	504.159	1283.64	363.382	573.041
		551.745	141.806	341.732	138.384	396.211	622.679	413.605	804.82	292.758	470.528
		831.89	198.459	698.94	119.298	435.317	649.64	584.552	1080.69	319.714	1663.2
		633.16	184.931	643.66	120.918	428.14	1395.68	487.96	1409	253.184	629.481
		766.803	193.432	434.3	111.987	654.042	1750.46	537.898	1488.74	262.033	361.854
		698.425	166.016	458.286	111.087	488.647	1691.29	675.322	1122.41	284.121	602.424
		769.315	195.812	592.614	103.918	552.726	855.829	601.596	1605.08	267.951	490.136
		597.196	211.087	603.987	106.154	738.001	1192.85	370.382	1459.65	305.105	602.016
		631.131	192.333	670.642	104.616	778.525	1210.35	437.359	1220.96	281.055	738.351
		930.967	182.915	720.597	112.801	580.155	915.937	1202.9	1880.7	292.237	269.493
		985.429	244.985	472.907	116.675	536.921	1454.62	647.053	1026.79	287.839	662.936
		965.333	210.78	595.387	126.989	345.204	904.606	768.97	1712.11	313.198	456.442
		823.613	180.087	628.617	116.574	393.062	1569.79	443.321	1316.14	297.068	900.643
		744.182	172.04	671.666	126.994	374.49	725.544	346.81	494.754	247.472	457.356
		604.778	168.873	606.188	125.417	445.594	727.335	580.097	1736.4	349.616	841.192
		552.079	226.047	708.365	124.15	489.701	1166.63	457.432	701.385	326.778	691.625
		605.662	205.552	404.319	116.959	668.928	989.005	590.657	757.055	278.925	505.104
		599.486	174.735	399.425	119.652	516.295	960.667	481.467	1178.55	557.605	668.913
		678.485	161.392	355.171	117.967	595.356	693.797	305.598	442.516	316.842	519.051
		808.581	212.006	632.415	135.404	501.807	737.902	271.903	1038.44	483.054	494.254
		675.254	192.996	613.002	117.767	584.612	1776.98	279.932	920.71	322.842	467.797
		710.738	216.77	535.905	111.859	473.312	783.525	390.286	759.152	419.391	521.522
		576.065	160.927	596.033	107.62	548.224	1674.75	397.314	1016.48	515.435	672.154
		490.099	191.412	515.382	123.808	540.333	703.54	348.657	666.082	286.595	592.07
		1022.96	206.781	520.445	136.727	684.531	1513.74	270.549	932.054	284.036	600.271
		871.086	154.307	389.878	99.8922	540.541	714.285	478.569	1037.31	260.891	635.724
		1249.24	185.486	432.166	121.02	725.736	1217.81	296.495	1147.16	397.395	827.655
		771.638	220.744	393.761	92.2183	489.645	1178.2	654.925	814.99	418.885	448.825
		804.651	206.395	576.615	107.955	398.759	1120.59	517.81	989.444	356.718	1146.97
		834.937	200.958	552.87	109.309	461.379	894.136	423.656	596.163	260.373	983.62
		759.061	212.009	618.38	113.628	465.935	1065.07	337.968	489.209	334.586	785.658
		632.868	184.672	628.008	113.402	464.936	1756.46	309.5	1000.31	416.702	904.001
		605.929	165.826	463.196	109.632	506.759	2556.42	325.655	264.119	383.103	1064.77
		773.813	154.359	462.588	106.776	527.428	2061.13	422.19	1484.74	404.128	772.925
		823.082	187.015	420.413	120.038	440.941	2145.5	337.199	1313.12	461.439	1211.91
		642.242	175.754	604.083	81.4669	460.051	1149.37	551.402	1158.14	259.647	674.15
		641.191	172.453	385.672	77.4427	633.141	2320.17	480.223	613.241	372.071	572.551
		684.446	196.406	463.885	85.8311	585.29	1595.19	473.83	1165.17	308.6	765.034
		863.787	179.034	500.435	72.5396	813.326	802.005	694.951	826.768	309.812	1070.89
		732.009	169.413	575.966	79.0291	682.812	2400.55	524.411	1093.53	390.27	1044.49
		816.247	174.386	553.895	96.306	524.487	2698.56	692.823	1653.83	378.874	1182.78
		609.855	181.237	449.627	94.8475	823.496	951.178	468.352	1148.77	332.512	1231.12
		654.699	158.941	417.347	94.6561	562.947	979.86	1149.18	1121.24	289.579	1278.3
		754.15	197.64	583.427	99.3684	469.154	1415.45	715.766	1035.37	314.583	581.008
		968.206	319.852	749.479	105.15	465.677	1309.66	533.149	849.615	441.261	534.347
		754.916	191.733	446.779	98.968	480.237	1624.91	899.459	1508.18	330.024	1083.21
		884.624	217.022	437.743	73.1176	451.819	1606.67	759.096	1472.92	469.11	1146.62
		673.505	217.646	418.917	74.8797	584.89	1734.83	698.641	1829.56	534.791	1229.75
		1290.74	237.995	405.519	89.8126	585.953	2406.73	367.543	1387.97	367.831	660.164
		823.635	198.391	428.368	79.3484	531.481	3075.8	357.156	1272.12	373.782	1143.12
		1030.79	226.419	530.77	96.9812	453.938	1291.38	707.875	1641.29	304.1	1026.43
		947.032	213.66	434.004	81.3023	340.387	901.43	727.911	1259.82	375.7	936.539
		617.411	148.222	510.469	95.0226	759.064	1570.12	623.138	850.7	497.627	734.651
		677.178	140.919	717.243	87.1857	431.899	1424.63	565.709	818.654	392.617	516.381
		1112.65	186.179	565.988	118.022	1025.35	1632.53	923.483	1246.69	278.879	596.019
		885.624	190.557	513.912	93.0686	316.241	654.726	305.258	874.447	482.265	750.046
		761.777	213.494	646.761	72.0964	713.685	1843.93	290.266	753.387	350.469	456.861
		792.829	120.054	336.087	78.0606	395.195	1042.65	389.163	471.19	245.47	448.708
		614.097	129.742	314.717	71.9379	852.126	1152.19	342.724	798.909	345.932	462.284
		778.039	156.548	414.675	60.6082	321.608	812.281	558.844	505.231	252.602	658.043
		522.499	114.476	483.952	63.7399	386.826	832.717	389.988	702.424	304.65	480.067
		575.233	153.546	692.652	59.9945	669.175	1007.73	425.974	732.598	450.381	515.155
		760.5	149.445	392.605	70.9404	365.345	960.601	428.235	423.308	361.319	549.854
		688.236	154.397	3619.33	227.194	466.889	1388.72	435.634	653.364	392.469	451.355
		824.031	135.694	3758.23	252.761	958.727	1565.21	372.171	675.072	235.406	652.69
		776.545	138.602	2481.79	73.8821	379.007	695.486	700.104	912.532	239.503	281.081
		767.012	151.52	2374.79	81.1587	602.883	770.161	584.4	907.901	788.851	1115.34
		459.302	144.683	3330.72	187.023	1025.04	1262.83	536.573	741.904	396.052	769.17
		615.323	146.731	2920.62	188.772	392.181	842.875	551.56	911.265	386.797	1070.01
		576.484	152.648	2861.43	258.721	687.902	739.559	413.707	520.432	234.205	638.535
		599.073	159.824	2383.97	193.193	853.774	890.277	357.993	1254.49	316.217	918.209
		501.227	167.917	2893.28	238.31	390.742	1333.27	321.222	850.25	259.338	875.162
		588.09	161.164	2524.94	226.418	617.953	580.723	696.7	615.638	279.811	493.856
		566.09	163.372	2761.21	212.996	609.596	1013.88	459.94	641.389	245.658	671.881
		745.427	136.262	2205.57	178.306	622.961	707.185	411.373	934.175	268.033	566.917
		765.393	137.243	2093.94	142.816	455.343	622.568	372.111	406.602	640.495	525.961
		773.372	158.394	2917.5	229.614	598.945	751.469	398.183	349.037	291.693	386.798
		653.996	122.038	2820.21	224.765	698.247	1315.21	494.277	358.095	256.239	538.927
		543.978	145.953	2599.22	208.227	780.188	865.633	300.198	305.534	448.359	787.129
		648.073	129.655	2131.96	201.159	510.591	662.1	330.667	321.123	522.173	1279.33
		736.403	130.379	2004.16	79.2432	417.186	534.209	386.508	558.798	357.26	788.886
		589.87	162.982	1061.26	103.647	459.607	541.149	425.628	355.953	674.075	1200.26
		588.857	141.058	638.305	107.943	557.816	758.126	410.301	932.107	323.466	676.437
		575.945	157.989	1601.2	195.538	545.83	1101.56	417.455	752.261	329.269	527.13
		735.126	183.328	1661.94	174.755	451.674	1604.88	375.8	462.892	461.893	1067.18
		1158.54	194.669	2156.78	220.307	592.251	1406.35	425.294	565.029	428.936	538.988
		661.648	199.834	2034.01	227.247	421.006	1482.37	367.895	958.855	383.704	936.736
		1071.74	193.77	2467.33	218.171	393.384	842.274	528.507	610.827	330.358	765.51
		937.361	204.825	1855.81	189.566	321.602	559.752	449.082	781.34	231.072	483.94
		614.637	186.691	979.364	149.874	364.401	695.734	567.462	649.302	285.284	306.859
		1079.25	206.083	1235.47	213.735	517.227	1419.42	317.667	925.901	405.073	575.102
		785.995	185.208	3059.6	204.825	604.37	1844.63	449.789	607.05	345.009	975.598
		772.471	180.059	2947.59	275.276	629.255	932.846	318.072	1043.78	270.75	246.459
		920.83	166.195	3283.37	208.715	419.665	1224.33	774.032	1557	306.067	377.657
		657.231	109.776	3362.75	201.39	260.013	1161.22	575.415	1167.82	302.075	602.758
		969.179	171.666	2424.72	223.927	441.228	621.319	271.943	1163.87	410.437	526.908
		1051.1	156.641	2804.74	224.914	578.404	839.391	480.553	1082.37	410.409	586.673
		858.739	158.304	2810.35	227.439	533.434	736.081	350.503	742.103	543.19	645.634
		749.528	122.926	2424.32	231.407	558.268	1711.75	484.568	616.961	236.536	475.445
		650.703	111.998	2830.63	243.331	693.841	988.225	283.306	756.79	396.429	808.979
		707.437	138.223	3647.47	232.474	464.388	969.646	337.151	528.889	643.785	765.157
		910.538	156.171	3527.87	222.408	608.241	840.989	376.256	545.744	385.252	618.452
		859.549	163.094	3683.25	248.587	571.989	1838.41	341.458	619.148	287.243	274.998
		811.608	145.992	3132.84	246.527	545.088	1170.05	315.597	343.656	351.497	394.777
		910.97	124.85	1616.67	203.867	508.519	718.176	629.994	542.461	262.799	335.634
		650.084	132.993	1379.87	160.569	534.563	618.003	702.734	729.704	499.711	848.311
		793.335	169.581	1069.44	117.987	777.206	1437.86	585.869	693.813	346.257	658.508
		631.821	107.3	1015.79	147.804	370.497	1368.28	616.402	352.223	425.158	644.545
		691.16	161.429	1013.76	139.429	421.737	822.296	467.214	649.339	246.917	300.525
		762.916	137.394	726.346	65.3338	460.392	830.358	496.025	521.121	265.157	385.18
		542.285	143.798	640.114	61.3199	361.177	1158.33	377.876	488.854	506.028	477.601
		750.352	153.067	521.109	65.7393	493.45	1039.55	365.253	505.25	456.564	528.025
		855.543	181.147	800.78	70.7717	317.076	1689.37	340.056	413.187	349.872	574.93
		823.093	149.977	725.297	63.5315	290.896	789.896	409.9	524.534	414.037	380.661
		735.459	137.957	982.712	65.598	382.444	878.848	375.128	915.189	347.035	612.334
		595.65	183.062	1710.29	71.4244	371.889	1680.2	423.623	711.462	586.394	625.758
		920.225	148.053	1484.93	78.9758	412.791	1332	569.932	720.242	320.944	436.55
		732.92	168.901	1283.84	144.534	437.698	2187.5	417.433	519.808	290.868	759.339
		662.536	152.98			334.621	763.175	448.014	1083.24	295.831	1117.8
		1033.6	153.313			494.71	883.65	329.89	412.548	282.127	906.638
		671.483	145.953			719.269	3081.52	344.247	1076.71	445.689	992.924
		624.448	154.944			401.436	1454.31	561.582	820.935	539.377	1058.38
		685.987	169.812			405.796	1747.92	277.5	1557.2	435.526	1116.68
		607.792	157.257			461.17	2007.07	530.495	650.707	514.186	1214.88
		554.092	182.96			460.126	1213.11	498.069	1042.43	320.409	590.778
		773.4	195.316			459.338	1444.55	342.615	989.852	347.929	552.485
		1060	172.165			536.021	1368.78	267.027	637.405	349.502	560.033
		677.276	102.903			567.168	1874.1	308.925	1223.36	436.389	665.543
		883.615	138.545			426.043	1073.9	508.317	396.895	547.133	740.448
		728.87	120.505			409.294	730.115	357.742	1016.85	526.979	596.753
		806.57	124.379			377.87	795.433	334.143	710.029	453.463	502.849
		535.223	118.771			327.167	765.453	403.278	541.089	389.557	1153.37
		668.144	147.555			436.99	2131.52	572.859	658.891	583.019	850.802
		674.203	116.567			370.447	982.291	340.604	1074.21	270.772	709.901
		573.458	117.121			442.047	1077.43	583.73	1041.85	271.682	696.024
		1177.97	132.111			418.039	1244.41	405.227	699.446	354.901	1683.51
		833.797	151.081			506.862	1482.33	636.029	1078.11	378.144	879.214
		728.136	134.977			478.403	998.798	1494.87	1371.15	412.147	1034.05
		946.727	146.993			346.354	1010.66	457.319	724.994	655.42	696.217
		1160.82	159.127			362.235	956.647	424.23	614.027	359.713	589.54
		593.947	178.991			385.589	1040.73	626.276	643.31	307.824	829.069
		1285.71	148.893			519.603	1005.03	534.491	671.902	265.486	1126.51
		1005.3	170.77			484.688	1075.31	327.927	577.466	323.663	1271.6
		721.159	117.896			462.002	1467	603.595	564.192	450.084	695.295
		563.298	105.868			455.596	2160.74	454.049	617.224	331.593	801.033
		626.073	119.336			478.729	1881.62	369.567	746.361	623.888	700.253
		576.079	122.799			485.37	1064.39	447.653	866.206	635.242	919.342
		817.446	126.742			509.565	1671.74	398.852	1077.12	720.341	706.339
		704.901	104.458			765.433	1075.69	287.189	1043.07	402.884	585.929
		542.633	137.026			391.746	1364.13	464.657	1005.82	290.566	1178.49
		489.169	102.936			382.196	1027.81	887.704	1072.12	347.517	1269.15
		657.226	91.8479			427.969	1130.57	491.858	964.235	587.062	1188.35
		1067.63	106.909			1307.47	2312.07	404.236	630.043	416.471	1559.89
		707.154	123.491			494.676	1576.26	836.631	1024.41	453.078	1206.32
		986.816	115.677			638.845	3057.42	664.084	1007.59	593.264	1810.81
		533.639	131.073			460.385	970.145	430.426	858.315	263.195	1039
		1413.75	138.14			400.853	1545.4	561.715	838.59	488.401	1060.29
		618.593	123.678			704.978	1002.59	693.119	1255.32	348.447	1335.56
		513.889	83.2549			541.8	978.738	463.855	853.702	445.167	959.779
		577.694	91.2177			460.101	1180.04	533.996	812.95	471.615	868.427
		570.528	97.1387			526.596	2861.91	455.676	1065.14	293.479	907.243
		591.03	89.6578			407.83	796.042	352.105	1304.68	295.531	1241.6
		594.195	112.597			562.738	2515.72	333.125	517.69	488.215	1383.08
		680.684	116.882			1028.47	1706.99	334.386	720.417	380.839	990.449
		471.255	97.1314			479.305	1934.73	348.956	460.445	326.429	785.017
		476.892	123.069			574.869	913.153	762.773	918.87	342.832	1219.94
		568.362	101.646			456.602	943.345	350.194	773.357	315.293	758.47
		741.433	100.032			303.923	624.167	507.19	732.939	384.87	1217.88
		597.505	118.175			409.776	740.181	910.824	1083.02	368.062	1220.36
		814.724	140.571			405.803	1297.57	461.178	861.131	316.433	827.726
		525.713	120.532			308.692	734.133	553.828	858.888	286.402	769.116
		904.527	100.993			604.797	603.984	384.294	1329.37	305.972	990.086
		699.594	113.46			482.879	998.921	335.882	505.588	353.759	908.683
		802.275	123.62			383.515	888.057	359.481	796.845	338.328	1187.92
		873.853	117.955			389.823	700.318	324.722	1008.78	301.554	1050.59
		827.458	104.109			424.727	702.716	482.254	700.327	268.847	1385.41
		675.795	101.712			353.304	1314.27	370.974	592.942	386.957	1378.18
		778.516	123.766			400.346	765.794	551.307	1064.51	671.752	1980.31
		635.458	106.266			411.818	685.048	301.137	900.958	373.509	975.864
		704.121	64.7761			424.69	899.569	308.5	1026.5	246.768	402.925
		3765.94	355.876			532.226	1352.79	320.669	322.68	335.456	934.938
		3069.51	438.989			382.404	618.435	480.05	411.817	465.802	647.326
		3313.99	314.31			439.822	1764.92	385.918	420.275	480.128	734.724
		2492.99	216.669			339.574	1371.58	385.281	470.767	491.132	1449.85
		4030.92	376.142			393.599	941.233	413.924	693.628	337.031	623.254
		3771.79	246.628			450.774	868.116	313.904	776.178	368.13	1108.64
		3803.11	320.871			453.562	1037.45	566.402	1084.84	323.272	1087.8
		3976.31	451.983			455.25	1254.32	293.827	801.571	336.744	664.937
		3952.2	345.101			364.979	1016.11	613.907	1187.84	346.32	871.474
		3877.44	345.495			346.875	799.607	397.852	721.461	409.568	1241.38
		3909.24	325.281			395.288	1429.04	356.7	703.459	288.125	1004.04
		2888.2	270.651			935.792	1701.97	315.862	663.457	257.208	758.217
		3941.31	465.819			549.482	1832.53	344.582	416.74	234.091	1293.73
		3802.92	415.167			391.01	844.429	433.789	615.232	462.62	728.833
		3179.11	443.383			544.054	1164.25	508.87	900.653	265.086	882.24
		3095.17	521.81			358.06	916.991	468.998	663.846	307.598	1791.91
		3895.93	423.345			456.009	759.338	427.476	869.821	249.128	672.45
		3062.03	303.433			326.012	1233.86	331.447	1217.36	341.695	1205.89
		3433.13	262.443			343.763	880.958	406.71	1161.5	273.238	1213.6
		2916.71	293.468			425.421	595.711	469.153	1006.8	322.728	1338.47
		2084.99	144.839			470.213	1400.39	328.297	1171.03	274.248	1148.59
		2346.82	295.105			513.832	948.263	347.149	945.274	275.554	852.475
		2492.24	262.52			411.127	1216.25	297.076	1012.33	529.109	880.907
		2855.8	310.631			284.949	797.556	370.929	1075.89	413.136	864.919
		3409.88	331.029			431.085	979.013	291.048	1124.7	325.33	494.648
		4086.35	466.653			847.092	906.188	561.887	756.978	487.666	901.651
		4072.8	335.283			739.002	867.354	666.745	2000.64	536.863	621.415
		3985.39	324.93			494.538	833.757	280.185	973.889	409.831	956.228
		3999.76	463.57			544.387	1039.91	337.227	647.4	641.322	1224.05
		3992.71	495.844			433.696	834.184	659.865	959.034	443.522	1250.32
		3917.03	479.739			568.776	948.306	533.853	939.312	303.166	658.757
		3957.32	413.232			496.57	850.348	376.086	739.583	353.04	909.993
		4015.35	456.298			447.871	1242.91	345.225	1070.24	244.83	724.228
		4003.58	411.934			413.425	1057.42	339.381	758.929	359.743	980.275
		3995.31	287.299			353.935	971.988	545.272	703.573	666.629	861.555
		4043.5	453.963			369.244	1632.17	520.993	574.285	428.664	791.253
		3999.64	454.184			451.93	1286.6	304.04	920.869	487.229	613.027
		363.838	63.778			583.995	1085.43	367.012	481.1	317.349	719.204
		458.056	63.8425			434.848	1069.99	361.744	642.616	607.07	891.546
		479.546	74.0323			539.426	1211.14	359.195	419.838	406.027	757.165
		598.156	77.6427			470.326	1377.1	514.409	1485.84	389.036	698.929
		556.09	70.3052			398.402	1662.46	468.482	599.786	302.891	947.93
		469.744	61.5791			525.392	1640.44	782.658	826.695	236.593	926.232
		423.503	51.9282			546.538	1762.22	405.742	1760.74	321.097	958.59
		466.888	62.219			561.469	1881.2	605.891	758.845	384.168	691.544
		870.064	72.0574			437.234	1759.95	558.885	695.691	449.437	541.834
		377.64	56.5568			662.742	894.308	439.071	1340.99	527.306	935.815
		345.506	51.9098			523.828	1438.41	351.029	605.532	295.78	901.86
		436.185	58.0172			746.981	2221.87	438.565	960.981	575.706	709.57
		293.626	55.453			595.646	1138.04	552.881	1073.31	473.061	554.06
		338.888	51.0451			723.422	1533.09	732.235	1656.13	372.81	537.306
		578.158	58.3591			340.947	1293.05	829.546	1726.08	462.508	561.152
		302.525	54.0208			347.791	1936.13	557.871	1312.42	450.461	773.077
		537.213	52.0638			414.54	702.013	535.816	1133	530.834	448.451
		418.044	48.4701			350.931	1139.18	575.001	1234.36	391.489	788.979
		457.351	49.9452			1121.26	1154.5	417.271	909.722	476.06	565.751
		284.219	94.0441			444.972	1358.76	733.215	1276.15	408.32	686.914
		538.687	63.6896			405.394	1317.63	681.685	1417.59	291.457	444.98
		442.087	65.2173			420.634	844.577	371.023	1116.09	549.992	936.264
		603.443	52.16			363.306	1372.02	335.864	840.821	309.354	953.363
		517.155	55.4487			332.052	861.628	340.92	766.271	241.598	322.664
		548.077	58.5833			426.452	1321.29	424.003	442.483	377.338	710.539
		463.582	52.1172			540.459	682.773	385.189	1216.29	515.418	1062.56
		398.014	77.2579			429.229	655.998	356.493	455.649	479.57	881.964
		280.06	66.9424			611.154	1481.58	373.03	497.266	566.193	708.61
		569.042	64.8268			432.376	1000.39	450.821	428.187	254.479	368.573
		608.55	68.2959			434.387	947.823	644.97	1522.5	252.325	383.151
		409.648	61.5662			480.575	1627.09	555.348	1181.35	468.129	606.872
		614.381	73.8214			413.34	1408.16	679.074	1459.37	377.831	477.188
		753.854	62.1874			568.973	1407.48	685.986	1086.29	382.693	793.065
		554.503	65.8255			392.827	1336.72	425.995	937.239	435.775	809.945
		546.922	64.2146			395.932	1443.94	432.298	1014.7	518.897	561.64
		401.128	53.6267			413.529	1256.42	602.225	1003.73	298.93	457.92
		253.948	48.6379			552.26	2323.18	397.81	840.826	761.768	1585.02
		315.117	48.9427			480.759	1638.7	711.213	969.068	318.463	507.334
		410.841	50.8086			542.075	1462.88	478.262	1593.37	364.097	633.88
		407.729	58.027			627.99	1975.71	344.459	709.405	500.514	804.406
		319.718	47.6301			466.643	1046.16	288.09	1129.8	454.219	674.819
		439.354	49.6049			473.172	1107.35	477.146	969.336	390.787	720.341
		521.168	51.3547			438.348	1473.4	385.256	701.736	752.045	869.962
		604.457	64.8924			509.078	1417.92	693.763	1195.05	290.074	648.923
		669.112	64.5996			422.797	1098.52	268.333	1214.34	366.48	439.065
		781.521	68.4158			529.034	1474.1	474.477	817.442	312.762	491.819
		711.79	58.971			532.468	881.595	406.835	1417.55	331.001	591.096
		926.898	73.2216			574.355	1300.61	268.778	1118.38	357.05	409.455
		1082.58	72.6438			637.953	1471.06	694.778	1233.18	397.161	709.919
		843.343	67.9623			522.772	893.36	587.864	890.713	521.871	611.456
		961.013	76.7224			985.892	1762.2	369.537	470.016	367.279	663.975
		480.008	60.6728			820.593	2211.21	393.069	873.133	255.671	632.494
		401.748	57.4742			346.215	896.943	339.405	513.75	347.372	352.45
		326.504	82.5737			435.855	868.226	450.15	405.703	388.693	534.057
		895.329	66.1899			360.32	763.317	592.661	376.104	335.508	1008.46
		999.925	64.8783			421.966	1722.41	345.471	513.604	448.173	680.371
		957.313	64.1091			446.727	449.114	294.359	538.422	246.232	366.224
		520.336	54.2811			333.199	534.18	634.26	1166.21	310.03	697.96
		472.945	55.5918			340.92	664.972	431.827	938.832	617.51	613.323
		485.327	62.9172			426.995	1226.43	423.408	955.481	736.529	725.518
		359.07	49.4758			400.936	617.627	371.433	1361.4	231.125	506.455
		414.573	49.3347			830.948	813.409	518.402	1785.4	314.395	592.061
		532.763	66.598			375.426	1262.67	344.073	1756.42	547.11	573.707
		660.637	66.8843			500.827	1378.25	481.354	650.63	521.459	939.769
		618.557	63.3062			706.835	893.1	551.925	839.617	630.657	686.333
		508.446	55.8338			691.658	826.556	508.55	839.203	338.921	347.11
		713.112	70.0129			982.942	957.708	449.921	1202.08	328.906	688.662
		522.371	76.5222			650.441	861.368	401.119	1224.59	640.607	741.799
		463.752	59.8714			403.338	680.541	461.806	968.42	632.848	954.853
		586.315	70.3277			582.698	581.893	465.461	791.169	358.947	696.184
		407.639	79.0707			562.755	731.89	554.23	1198.57	345.033	762.944
		544.13	77.4041			312.796	691.484	887.379	1213.8	392.132	770.515
		388.741	81.2472			571.9	700.857	925.948	1026.15	344.28	962.563
		793.525	74.1186			759.184	1135.18	568.402	1222.57	236.247	784.019
		605.169	77.3527			682.752	925.482	610.775	1105.07	604.156	601.716
		529.678	80.0823			534.325	757.179	551.907	1168.88	618.89	939.035
		857.534	83.8315			729.85	1032.07	516.372	1185.49	393.956	774.793
		614.469	62.6728			522.586	565.6	530.019	1355.81	455.858	589.541
		637.274	76.4425			382.103	687.468	540.503	1128.15	423.602	578.196
		810.571	87.2776			808.227	884.071	315.063	1320.19	512.235	583.719
		913.801	100.372			439.868	699.596	248.016	1077.33	324.904	839.528
		810.94	69.2881			481.664	713.165	268.185	1015.13	312.582	587.24
		671.211	74.6449			374.254	416.6	283.6	1356.15	519.557	910.385
		1103.97	87.5671			470.253	552.218	325.509	489.961	575.747	1024.39
		507.96	78.4191			429.516	579.258	345.119	672.125	444.808	946.12
		450.16	95.3505			664.318	1459.87	318.448	638.488	298.952	667.406
		419.722	88.0596			997.979	1728.16	486.906	647.268	719.651	723.327
		583.809	87.3482			274.913	466.795	484.23	871.826	349.519	783.113
		496.403	107.365			636.662	725.376	299.763	756.553	528.3	603.676
		561.664	103.13			570.877	719.192	551.319	887.301	507.725	560.381
		441.535	81.9792			591.799	758.201	285.504	914.21	455.797	532.931
		510.797	143.242			373.672	665.947	283.131	693.318	368.9	663.877
		746.006	147.64			588.689	527.132	460.801	544.051	605.719	1076.17
		497.621	142.151			810.903	1274.79	407.248	572.372	480.121	622.947
		567.894	136.09			815.536	1247.19	300.832	380.969	636.806	672.269
		564.025	160.307			468.57	708.152	250.276	1043.03	584.313	826.317
		493.613	171.914			1104.09	1158.7	447.637	1077.19	348.231	732.136
		665.278	177.377			470.581	902.864	377.354	915.672	557.904	490.773
		334.567	83.2256			365.402	561.948	365.555	800.487	458.876	792.3
		377.642	80.3886			380.8	1012.42	453.099	1863.84	302.003	750.532
		426.007	72.8486			418.295	663.822	439.514	1080.9	547.132	661.695
		274.524	56.1344			870.083	1266.09	651.951	739.857	302.938	866.249
		271.319	68.3398			869.475	1462.46	351.966	1339.87	579.185	749.168
		416.044	96.5596			420.992	935.328	816.185	1050.89	397.421	808.576
		370.404	75.5958			386.835	880.73	383.297	438.864	503.502	981.739
		302.228	71.8317			386.98	531.617	307.27	697.968	384.214	835.44
		443.962	82.8114			548.058	1011.8	429.378	968.543	487.72	812.224
		414.546	82.9878			527.003	1103.63	382.486	1007.47	582.6	884.598
		336.096	69.187			1055.8	1526.37	525.395	1046.63	326.137	680.847
		293.762	92.0465			747.561	1305.03	283.542	1581.58	295.062	621.769
		388.605	88.4475			491.767	658.013	293.199	1846.9	369.109	608.509
		462.64	85.4259			412.359	793.506	313.986	1327.85	454.584	664.591
		427.126	78.4093			738.404	1810.55	512.348	677.228	410.656	904.314
		409.726	85.8119			571.525	1136.19	325.354	555.292	524.068	1175.56
		369.184	62.9535			444.812	769.284	553.568	776.033	529.643	816.289
		418.901	69.8099			571.911	1268.27	567.33	943.248	677.549	898.901
		412.636	69.3237			586.078	1218.15	531.826	810.213	449.518	869.303
		413.34	73.3877			506.926	1003.46	475.41	679.473	452.386	785.2
		366.322	63.7361			400.89	1190.31	254.994	985.6	552.158	1135.93
		392.407	71.3531			395.794	1071.93	510.333	787.975	691.134	691.713
		454.341	58.1733			680.777	1086.43	312.413	987.247	368.091	700.504
		341.262	79.2079			431.221	464.282	362.937	592.649	740.348	938.293
		320.5	67.0777			472.44	878.466	376.425	588.128	368.258	530.993
		348.894	57.556			586.025	964.397	488.049	394.941	748.534	735.486
		373.041	54.3708			405.917	1497.1	275.732	247.315	459.14	862.697
		550.896	67.1864			449.253	946.396	590.092	446.178	580.777	807.475
		598.118	72.7439			388.899	760.768	863.982	834.47	668.885	721.227
		629.855	68.849			507.794	876.886	406.17	838.173	256.929	501.994
		473.1	59.5603			628.402	1491.38	680.001	629.653	241.748	506.049
		606.134	61.4927			483.936	1497.33	591.412	876.533	584.626	783.919
		480.979	64.7234			366.078	581.807	374.99	359.354	609.697	929.374
		401.039	65.7049			371.962	666.381	365.22	572.051	771.701	753.949
		351.661	69.0197			366.979	971.951	350.426	959.142	508.756	1157.23
		255.485	53.4672			513.066	743.035	675.738	878.129	498.404	927.525
		295.632	54.7462			776.526	713.62	459.369	564.396	438.909	849.93
		344.916	66.087			606.614	775.657	411.175	444.982	594.557	840.85
		369.844	52.3507			609.277	889.838	919.634	745.395	473.355	953.301
		293.583	30.3888			680.683	953.765	695.516	1455.28	357.506	738.064
		337.055	55.181			737.57	621.163	823.618	703.649	491.412	579.438
		355.246	55.4295			502.311	589.062	526.514	819.31	365.224	652.225
		415.27	54.8255			420.697	859.376	443.221	851.215	427.003	491.409
		279.589	60.2069			378.366	956.84	691.639	672.027	419.457	848.339
		268.337	62.1947			714.651	1096.01	530.587	958.537	372.642	831.326
		381.86	46.3398			347.425	637.926	366.531	382.348	331.262	1057.15
		442.457	44.2065			762.355	904.975	410.983	904.125	343.892	909.013
		382.27	52.6674			559.281	834.529	547.18	868.868	553.313	977.18
		358.264	54.2405			472.806	951.945	632.373	1505.66	442.993	1005.77
		390.505	53.1795			411.76	793.28	556.696	1089.3	248.32	735.159
		392.171	86.2591			475.497	869.065	578.379	1332.48	357.802	824.593
		458.513	93.7869			636.471	1202.78	658.85	1411.03	302.25	681.409
		356.191	107.964			407.431	897.189	320.707	1818.89	318.527	707.063
		398.149	54.2093			501.339	812.476	341.416	982.312	426.421	585.543
		372.291	69.2849			860.287	1359.1	504.254	1138.28	329.854	623.854
		426.769	62.2447			1001.04	806.426	509.458	770.421	467.887	769.003
		434.533	44.835			315.625	614.009	423.186	779.039	349.286	682.331
		376.603	69.9653			746.763	857.851	567.36	902.286	617.716	840.882
		349.323	55.3842			472.461	656.433	813.203	990.429	306.82	636.853
		364.72	76.2994			885.508	945.938	314.465	595.195	406.36	779.893
		355.971	63.3096			511.124	1000.87	381.366	922.485	392.783	814.951
		420.659	53.1732			499.414	940.139	352.952	780.716	256.189	550.665
		322.725	59.55			358.088	784.847	323.74	929.279	415.782	622.403
		354.4	65.0711			668.341	768.493	511.156	720.915	311.281	587.802
		411.486	65.4481			456.28	914.849	580.479	519.417	276.078	674.288
		392.568	80.8894			1392.89	1316.73	398.159	519.721	550.635	688.309
		387.265	85.7371			441.164	1819.76	468.554	967.026	682.698	731.577
		458.128	70.3123			671.891	947.551	518.272	682.451	372.334	684.073
		557.478	68.4073			490.441	1009.04	340.767	1067.62	312.728	444.337
		352.933	53.2444			482.645	911.625	281.152	753.696	232.122	526.298
		368.411	53.3293			552.715	850.067	401.878	493.755	584.06	820.07
		252.956	108.053			580.656	774.417	458.231	1079.71	448.35	639.658
		238.824	125.321			363.223	658.863	429.962	514.326	412.977	974.786
		300.388	69.3673			651.813	989.112	572.695	854.732	336.616	675.336
		319.191	79.6036			713.463	1331.83	593.354	887.277	548.013	871.1
		353.667	89.0759			496.848	835.509	330.078	637.888	232.767	810.933
		298.459	87.8148			803.352	1031.52	340.116	1203.57	433.182	785.112
		294.807	115.433			682.401	1207.05	378.66	651.046	244.471	899.019
		365.834	58.2925			694.552	856.313	332.116	872.14	365.619	999.752
		376.288	67.2421			729.712	867.744	712.827	951.045	304.505	809.336
		400.365	75.2549			533.236	834.551	336.261	942.284	445.208	618.286
		775.353	104.688			426.321	752.527	389.795	717.737	327.656	835.329
		911.829	102.432			550.95	1067.21	450.395	1024.85	398.159	707.036
		375.537	89.4479			612.039	1446.87	324.383	1036.18	394.082	808.019
		385.828	87.0645			760.273	1410.81	461.656	714.376	326.823	971.875
		396.969	76.6396			833.777	1791.92	428.108	622.412	296.045	707.237
		500.841	71.0123			419.009	1316.8	265.994	1294.31	261.688	922.893
		412.714	64.1221			734.647	1150.28	420.011	302.797	387.01	647.66
		495.908	64.5172			735.171	1247.09	276.312	1199.11	525.43	1040.42
		368.085	63.5039			706.676	1309.31	420.064	1104.12	650.46	667.17
		464.012	58.1747			581.188	1236.85	530.102	1166.57	298.879	704.585
		413.389	58.2873			499.738	1240.73	505.781	1336.17	489.317	778.415
		445.375	63.6521			646.544	1087.19	502.367	1156.08	543.666	709.295
		391.985	71.139			346.535	527.824	438.353	1477.3	452.773	863.714
		434.403	62.744			445.825	1050.99	527.332	1384.7	486.061	770.285
		2015.46	121.764			590.977	1239.65	314.742	532.84	401.09	780.957
		1789.89	104.864			457.665	1007.43	474.864	1074.14	423.921	957.119
		1831.36	105.26			606.564	1274.51	648.922	784.554	361.203	752.398
		2640.12	125.209			519.082	1749.23	388.443	1415.61	305.477	755.826
		1853.69	67.7338			774.786	1543.17	601.759	609.676	532.734	998.306
		2281.07	75.379			792.156	2178.27	341.13	880.923	417.841	797.16
		1756.71	87.9977			402.047	849.258	591.702	595.68	279.107	725.353
		1684.9	87.0199			372.814	637.703	360.535	526.799	383.027	921.289
		2695.29	86.6231			450.811	1353.43	1055.14	1517.52	430.47	658.63
		2316.62	92.5319			501.534	1343	594.116	1496.7	315.615	780.685
		2187.96	85.3597			499.284	600.755	588.157	1399.88	457.49	901.917
		2054.05	89.2043			550.564	1224.03	947.137	1462.96	580.176	961.066
		2484.63	131.31			596.132	1222.38	840.808	1548.36	231.304	813.07
		3001.16	78.9147			692.544	1650.86	375.672	1144.43	513.267	957.489
		2095.64	145.365			650.464	1360.09	348.3	1472.14	364.904	795.77
		2463.99	92.1717			558.54	1023.04	436.536	578.044	558.672	1123.71
		2407	132.011			686.154	1713.42	390.415	657.796	407.386	748.301
		2105.29	87.2817			465.707	1243.26	485.612	579.239	570.821	1154.73
		1472.48	75.1365			378.272	485.138	501.566	897.73	539.228	1407.16
		1275.7	84.7678			680.736	1190.85	451.481	1184.96	301.04	781.487
		2010.09	51.657			724.04	1399.86	487.846	783.977	640.375	938.228
		2015.59	55.9286			748.414	1474.6	543.87	821.427	261.678	492.76
		1288.81	154.723			749.757	1249.04	526.748	1048.33	335.943	802.743
		2237.26	226.415			555.208	1244.12	445.788	1296.06	354.137	864.766
		1612.51	149.611			683.427	1523.65	405.181	1576.22	360.979	841.831
		2647.74	202.154			622.73	1290.59	425.934	578.553	365.587	829.766
		2262.47	141.546			440.502	1017.84	267.043	1360.38	498.368	977.768
		2512.4	124.837			776.219	1330.13	319.292	1682.27	366.579	814.059
		2988.71	136.096			1043.11	2715.81	324.628	1135.12	379.072	785.573
		469.727	85.0014			524.473	1224.46	503.144	1143.47	496.887	861.558
		880.17	99.7631			486.482	1115.09	755.263	1432.57	613.327	883.859
		510.428	76.3451			383.592	618.213	322.946	1213.2	258.795	647.774
		705.329	92.7849			579.45	884.913	398.914	1040.58	279.452	660.056
		482.139	95.1508			607.521	1262.08	367.379	1075.43	254.092	555.848
		416.831	59.9489			471.808	829.91	760.944	1167.59	404.522	1029.91
		513.613	87.5986			510.277	1097.41	836.537	1200.75	321.409	819.175
		896.826	103.875			398.164	775.657	678.818	742.301	369.348	806.998
		666.374	73.7484			843.304	1839.21	584.371	1001.16	438.465	1197.31
		1170.49	101.37			453.811	822.606	374.594	1187.71	351.24	779.409
		607.612	81.7988			557.924	1058.38	377.804	865.279	238.708	342.275
		285.652	53.867			839.524	1355.65	374.669	1119.16	345.935	628.844
		479.701	49.362			480.931	1139.18	411.834	1071.16	262.158	936.167
		271.991	46.8495			479.242	586.136	374.108	869.631	481.468	875.031
		343.232	57.9304			517.907	682.703	371.677	1116.09	564.762	821.234
		346.329	53.6884			1049.6	1394.84	496.656	668.704	427.724	1095.32
		421.181	48.6639			375.722	1368.92	311.122	1087.61	287.561	759.538
		355.891	46.3417			444.091	1220.33	315.342	716.908	300.463	710.604
		2437.9	179.29			402.841	409.443	357.817	820.721	439.63	1063.82
		2429.24	138.929			400.631	766.033	830.603	1598.58	372.996	857.1
		2254.08	179.62			365.963	884.664	320.804	1175.69	404.523	557.754
		2031.7	140.92			549.552	718.27	375.963	1266.46	563.703	883.786
		1703.56	115.792			1208.42	2281.88	524.589	594.983	477.99	1203.12
		2054.21	163.762			515.685	1437.01	320.503	788.667	415.656	692.178
		238.54	64.5334			379.765	1282.09	661.868	532.707	640.269	1190.65
		250.283	69.2033			773.151	1580.52	322.608	722.133	566.571	700.141
		227.656	70.4014			836.577	1632.53	332.228	1235.7	239.054	718.211
		364.583	67.016			427.303	669.102	368.578	910.288	473.669	1475.05
		274.275	78.9955			400.058	417.35	325.833	579.238	667.177	2012.86
		249.827	73.935			1156.22	1280.46	305.933	1123.3	266.549	826.246
		241.987	67.9171			372.704	1473.18	307.25	1101.07	295.916	760.318
		228.017	61.1935			484.606	923.237	448.28	787.794	291.414	310.499
		204.26	61.2294			591.92	1082.95	459.717	980.515	244.366	303.47
		206.456	59.9113			423.057	732.296	509.854	1252.74	650.355	1154.45
		338.295	68.2444			475.94	1215.88	470.069	1849.11	1139.18	1084.31
		235.511	82.0547			605.643	1371.26	591.704	1271.15	1074.29	1265.91
		212.446	76.6416			283.868	478.203	322.184	1430.08	984.67	1432.87
		255.374	73.1503			289.648	284.915	406.052	1032.82	1069.3	858.238
		243.326	75.9266			285.022	154.142	712.965	1065.15	949.254	1113.12
		285.089	85.7693			287.673	531.232	476.24	903.072	920.744	689.967
		251.631	55.5722			276.577	886.693	377.671	991.037	924.114	520.955
		259.696	59.1692			246.908	908.494	402.07	542.92	1077.37	1910.98
		199.843	70.2129			273.086	793.737	296.176	561.176	920.767	1013.63
		289.847	62.5879			284.632	566.551	401.049	723.875	925.535	1123.05
		237.896	59.3172			241.533	477.716	505.575	1836.56	1038.66	2037.33
		316.921	62.726			283.374	1200.75	364.408	892.335	1127.42	991.907
		253.989	68.7067			289.466	806.938	362.921	969.471	1103.4	1491.12
		338.239	76.2506			275.591	698.932	791.954	1121.18	948.824	1102.74
		295.384	70.548			289.918	1135.54	693.25	925.034	1362.38	1511.77
		380.038	64.9746			216.252	637.724	308.559	1272.28	926.583	988.358
		256.205	50.7078			280.846	1045.6	382.215	1023.47	950.417	1054.18
		221.797	44.492			272.641	961.101	807.385	1266.58	1021.63	1203.45
		395.418	49.5417			244.074	726.904	677.861	1541.45	1100.33	1343.76
		301.748	65.6567			279.148	973.797	674.059	797.457	1297.85	1306.24
		299.973	59.1221			279.044	998.61	894.802	1251.75	1231.84	1396.15
		249.717	58.534			260.097	1076.73	436.576	1130.54	1069.26	1357.47
		354.416	59.4279			267.128	1077.82	753.696	832.121	944.196	1109.02
		304.247	57.6651			218.241	992.172	392.073	1318.11	977.222	1179.97
		342.186	53.3822			288.101	964.576	332.479	472.99	1009.13	1625.92
		373.948	59.7699			281.627	1237.43	501.01	887.716	974.313	2243.96
		268.139	57.009			219.797	799.417	522.895	950.988	934.881	1463.25
		292.62	62.3766			275.568	961.191	1646.83	1288.08	1064.85	1421.3
		352.881	62.5103			230.575	607.805	330.448	1231.07	1093.2	1191.6
		316.309	61.6558			251.115	813.301	384.261	529.396	1415.29	1637.71
		215.373	58.5771			284.079	847.728	406.303	855.534	1074.68	914.936
		437.755	58.9241			284.453	603.269	486.579	638.88	1008.41	1756.93
		191.192	55.5428			235.771	692.408	422.64	850.914	1158.33	1328.27
		184.053	57.2035			248.302	1166.67	345.397	1129.95	1084.35	829.931
		573.734	53.2222			264.446	1037.6	451.017	971.822	1201.47	934.958
		270.697	56.2055			281.387	879.343	319.886	505.741	1179.08	1849.91
		415.336	52.7335			242.374	652.644	314.449	363.065	944.588	1101.81
		257.007	64.5736			257.333	640.896	297.458	159.927	1022.27	1515.12
		234.973	45.495			281.76	834.166	345.487	1294.14	1120.76	1089.62
		435.462	50.4954			283.111	584.235	269.692	1156.1	1912.89	1493.77
		353.344	54.3481			220.341	523.15	749.016	1575.66	1288.19	1524.17
		192.672	55.3052			288.173	1115.64	445.024	613.175	1185.33	1404.31
		251.829	61.38			256.355	741.729	363.267	553.055	910.773	1450.99
		192.167	51.778			277.329	919.167	701.505	1360.13	1064.27	1012.98
		193.698	52.0352			237.588	1194.52	419.354	657.825	1143.4	1448.78
		505.115	44.1489			264.447	617.607	487.164	839.761	1436.56	1539.81
		240.626	40.6342			277.357	682.773	831.108	775.013	1115.9	1331.01
		256.149	53.5282			212.021	765.649	352.196	387.66	1138.58	1053.55
		261.099	42.5921			281.116	1507.02	404.338	566.483	940.06	1003.14
		234.632	52.3563			261.263	1446.63	419.951	578.582	1256.65	1617.56
		246.523	40.9666			270.327	757.722	601.519	437.36	1252.86	1563.53
		350.122	53.6616			269.218	888.379	445.838	978.854	930.419	1647.82
		202.275	50.5385			239.756	1001.03	665.897	761.904	934.746	850.681
		599.17	49.8862			229.909	699.634	365.606	449.259	1227.61	921.833
		382.07	54.3096			278.22	932.437	514.629	419.304	1425.9	1239.94
		252.216	56.7056			241.481	1243.44	614.654	728.281	1180.62	1003.31
		231.727	58.3485			270.221	1483.14	782.066	1469.62	1345.43	1112.91
		409.587	42.8886			238.191	1532.02	620.708	526.341	1340.73	1334.84
		210.96	54.0675			247.649	1499.2	691.279	1150.83	1076.17	856.967
		993.254	55.7094			236.554	1635.29	667.4	1143.8	1087.04	1946.7
		903.864	61.6379			262.361	1837.62	293.311	545.996	1038.99	1154.51
		515.921	65.3144			288.082	1449.29	614.709	855.885	1127.02	1373.74
		521.644	57.9642			273.296	1032.08	674.247	1047.96	1075.84	1144.63
		571.882	62			287.436	1584.21	310.741	457.392	1061.42	1639.41
		682.154	60.3636			254.593	1709.97	308.488	1185.8	928.907	890.414
		486.075	62.7426			285.233	799.584	779.381	956.611	936.735	1095.25
		754.964	93.5638			256.101	865.607	1558.33	1378.31	1011.4	1670.39
		755.102	83.1651			223.898	877.201	521.772	1223.59	1017.13	1137.77
		828.525	75.2545			243.221	736.068	421.353	646.509	1092.04	1001.34
		1637	73.4167			285.332	1082.32	367.984	769.194	963.713	1041.37
		973.667	71.3802			271.121	1193.17	283.208	1028.59	1071.35	820.33
		1122.29	78.5697			280.822	1066.02	470.088	650.887	1081.7	1139.49
		1010.46	81.3039			217.405	1079.98	291.755	1630.06	1003.4	1712.13
		1262.64	69.4982			242.378	1239.8	1057.66	1971.91	1002.02	1176.26
		1216.14	75.0555			253.159	400.472	1830.31	2113.8	1179.21	1236.27
		1002.4	77.4923			215.571	772.615	2215.14	1714.55	1279.2	2072.47
		2343.65	68.6061			245.733	624.247	2576.44	2462.13	1007.18	1298.94
		2134.24	90.0124			230.018	1322.45	2585.37	1285.3	2534.07	1624.95
		2017.09	79.8668			254.08	796	578.508	971.819	1832.34	1685.24
		1856.39	67.7287			281.445	1019.91	506.353	645.752	1108.25	1188.9
		1943.76	89.1503			262.688	782.759	373.656	1093.48	1119.72	1217.83
		1824.62	67.9698			269.691	1096.9	390.674	830.576	978.279	1053.69
		2191.17	95.1814			254.91	1099.63	388.8	613.455	980.352	878.574
		2704.97	83.6995			272.994	1215.63	339.972	1241.8	1191.31	969.506
		1140.45	84.4003			276.615	993.156	676.479	1005.61	1101.76	1851.45
		1275.56	65.6604			243.513	642.134	284.706	1086.59	940.484	1056.51
		1262.55	71.3705			257.759	709.136	442.881	1667.83	1045.4	1200.42
		1548.55	78.97			269.156	760.778	314.844	858.278	1025.17	1170.45
		1624.37	89.799			264.75	600.743	427.662	1214.36	1066.24	1393.94
		1705.47	83.6143			257.938	581.145	264.789	805.7	2259.25	2621.94
		1164.19	66.3434			251.139	813.38	364.082	866.866	1839.15	2564.82
		326.055	46.5438			271.079	1272.28	368.724	1018.62	1812.35	2322.1
		382.799	48.464			268.383	893.721	436.14	1488.63	1367.01	1673.56
		387.688	50.7806			287.742	735.44	406.67	978.578	940.698	1637.3
		404.865	50.3109			283.172	1235.87	368.575	482.29	1659.71	3403.56
		433.181	58.6134			268.581	784.258	451.916	552.858	1928.95	3201.4
		339.484	79.2363			289.861	995.615	326.672	698.804	2293.59	3107.47
		346.451	57.6437			260.792	1071.06	280.23	1243.17	1695.83	3101.52
		362.029	44.5162			281.427	1138.72	277.122	567.7	1639.43	2615.65
		474.512	47.3965			234.457	961.798	341.743	687.267	1694.7	2375.88
		461.454	42.2558			287.114	1352.66	268.564	349.397	1687.32	2799.59
		390.802	55.6911			243.331	595.808	305.788	1019.64	1072.58	1777.5
		274.023	53.5256			285.614	884.671	349.127	391.454	1696.27	2564.34
		367.51	54.5956			264.43	773.727	391.802	1020.4	1712.88	1422.91
		355.206	47.6178			274.884	1127.99	535.569	757.493	1297.81	2020.69
		365.005	49.2726			267.64	843.883	430.008	735.448	945.237	3494.7
		310.43	46.5478			264.874	943.098	403.378	747.463	1553.96	3187.37
		350.975	60.9413			270.779	889.361	555.932	1465.97	1904.88	3203.74
		366.958	53.5444			274.858	818.69	471.768	1164.04	1711.35	3535.02
		271.299	68.2987			288.575	972.335	439.376	554.057	1338.52	762.158
		398.805	55.6617			255.228	815.586	523.737	674.837	1005.15	1808.09
		350.953	57.814			262.803	859.97	509.33	619.241	1365.16	1443.15
		502.146	51.146			274.598	779.797	381.625	912.72	998.987	1301.06
		400.8	59.1954			268.054	722.563	682.258	1310.57	1059.91	902.161
		422.177	61.9744			281.827	964.214	580.763	826.437	1447.4	1203.47
		412.139	62.2652			252.611	778.181	548.669	2181.46	1122.1	679.11
		352.025	58.178			273.681	730.177	636.689	1183.05	1087.67	1107.99
		342.289	53.9848			234.597	689.373	303.011	979.351	1198.73	1302.39
		414.41	63.0212			277.016	765.98	336.471	1115.65	993.152	1008.03
		356.09	58.3382			223.389	556.926	512.424	764.069	955.625	1914.51
		362.077	56.9945			246.852	789.148	544.847	1017.97	949.107	742.345
		525.806	61.0368			274.95	1136.4	378.038	1177.78	1055.72	767.508
		321.525	76.9746			233.806	538.244	465.351	1049.73	1078.22	1177.43
		726.792	66.754			278.138	262.933	415.375	1253.54	940.526	827.857
		520.714	56.5434			261.355	258.854	1757.06	1716.77	1271.81	706.329
		335.401	63.8693			253.005	262.529	1289.98	2269.75	1073.96	778.892
		414.131	59.3939			275.925	641.65	352.652	1341.26	928.837	807.757
		375.901	58.8719			227.146	331.501	1572.07	3354.73	914.037	1079.7
		689.253	70.9936			280.013	746.037	457.362	1486.34	973.866	1110.17
		381.539	68.3493			231.102	600.366	631.059	1075.57	968.542	770.61
		349.853	90.4422			210.322	929.655	339.976	1385.4	941.725	807.147
		406.554	77.8678			244.715	786.894	325.947	1115.13	991.544	855.886
		372.983	78.686			276.789	517.745	741.266	1888.32	1564.55	2196.42
		288.657	60			263.217	870.428	395.276	1395.35	1104.01	756.563
		343.692	95.1221			228.83	1047.16	378.89	1188.62	1255.88	2732.61
		252.192	91.3291			245.777	1407.8	729.345	727.095	1456.91	2238.79
		438.232	83.3811			241.504	1696.62	489.534	1144.43	2392.61	1936.41
		986.354	108.756			268.956	642.077	540.238	911.629	2672.14	3159.1
		585.549	84.8157			271.949	757.235	282.321	1172.13	2568.64	3094.79
		489.095	101.501			252.962	525.494	706.441	1152.98	2726.1	3396.64
		231.651	60.7488			270.498	899.661	535.528	752.867	2636.04	3071.85
		231.57	60.6443			273.495	613.998	361.457	1454.02	2318.33	2782.61
		235.003	58.333			247.414	696.621	374.554	825.179	3366.22	2110.93
		254.036	61.9084			251.996	1948.3	371.763	1397	2953.76	1991.93
		399.575	52.3444			272.251	962.22	550.057	1181.14	2707.28	3054.7
		248.55	60.5448			254.126	1355.91	406.135	1131.33	2650.53	3162.91
		211.544	63.0289			233.479	1169.53	831.324	1362.62	3241.58	2267.35
		265.018	72.19			251.059	1680.64	509.872	1428.11	3044.49	3376.92
		292.746	45.6196			265.77	1096.58	403.644	1385.39	2274.68	3313.67
		211.677	60.4536			258.367	1410.09	626.56	1230.18	2725.6	2887.36
		424.951	76.6324			240.358	467.531	568.66	1202.48	2419.25	1696.6
		392.099	53.236			210.932	489.133	576.504	886.098	2755.49	3446.47
		423.299	50.1686			268.849	704.567	594.747	853.175	2668.41	3258.34
		743.8	60.7906			275.368	760.991	504.912	1016.79	2655.47	3572.16
		507.39	52.63			283.412	643.282	472.544	1023.18	2463.79	3668.36
		419.123	56.5338			274.983	407.559	453.048	1513.43	2957.48	3099.88
		367.62	65.1872			264.263	835	437.048	1239.24	2682.02	1668.82
		548.698	58.4853			228.208	1102.34	461.985	1091.58	2969.88	2621.39
		177.362	66.4051			231.867	422.516	465.651	500.152	2799.51	3412.82
		186.334	65.3205			220.622	683.185	430.494	826.779
		209.394	63.2295			217.977	751.681	814.647	2440.93
		238.133	64.8548			258.398	1049.1	599.414	1364.27
		274.362	69.8226			214.273	355.456	560.391	850.216
		157.839	58.3558			270.945	655.627	722.364	1177.28
		213.581	62.88			222.129	460.8	604.841	1567.59
		299.935	70.7497			230.236	624.124	586.283	2241.93
		305.34	69.9894			214.31	918.742	284.218	1393.28
		573.191	168.677			282.405	472.824	354.78	1442.88
		399.989	150.209			210.217	734.297	354.366	1549.92
		522.093	142.693			248.614	558.38	689.335	751.785
		552.324	134.691			229.186	459.016	412.524	635.536
		544.634	133.394			245.126	1021.09	711.55	1835.55
		320.333	110.172			249.773	764.356	2861.22	2486.15
		324.63	109.954			268.587	685.294	2018.58	2729.06
		462.022	113.915			286.941	1529.93	2277.98	2071.02
		438.049	99.8643			249.169	976.407	2081.48	1704.52
		456.881	101.049			279.756	596.852	1837.88	1957.68
		572.103	72.3343			228.11	779.525	311.674	1066.98
		258.415	57.2629			286.201	719.073	2976.92	1748.82
		343.947	60.3965			287.325	773.612	1865.11	1799.36
		283.037	59.6389			282.956	599.59	2909.79	2023.66
		273.773	55.9807			247.869	1019.52	778.463	1937.86
		373.542	57.8339			257.182	1839.96	2826.62	2418.43
		368.303	56.7195			230.449	1012.44	347.147	253.824
		258.509	53.7385			277.236	1436.88	1126.87	1773.58
		199.725	62.5785			229.036	934.484	2229	1946.95
		226.818	60.3684			231.438	763.885	1662.29	2139.86
		320.009	68.9167			228.543	854.961	1894.64	2419.6
		352.247	69.9589			283.668	1016.68	619.85	1584.84
		698.206	123.13			257.269	1038.83	465.191	1531.42
		1017.96	106.405			288.079	719.447	750.82	1203.2
		171.085	56.714			273.445	945.32	1087.66	1501.43
		167.279	53.4638			274.808	689.768	285.716	1017.93
		252.543	59.5327			269.131	1234.96	452.517	453.008
		255.071	54.7875			268.859	795.646	250.99	890.76
		201.444	57.8314			253.293	1149.89	533.828	1339.62
		326.811	68.8398			275.555	951.185	354.648	1238.94
		364.62	72.1166			235.64	1164.86	367.016	2068.56
		577.743	59.1464			248.401	1226.32	560.683	1706.31
		509.79	57.0658			282.231	928.734	435.4	426.959
		571.97	52.9481			217.801	756.444	465.121	587.267
		665.808	57.4789			215.944	502.032	444.304	1259.43
		477.112	62.233			285.008	535.687	426.438	906.783
		430.584	57.2997			236.771	1226.21	1136.5	978.451
		390.969	52.2148			220.654	593.961	614.29	710.184
		550.851	58.6509			257.371	563.408	347.73	695.875
		481.224	60.2676			244.526	785.05	789.482	658.905
		390.821	59.8302			274.991	708.214	620.503	516.31
		390.065	60.4464			273.283	846.537	1178.4	950.326
		361.688	55.5			231.417	528.667	606.645	491.225
		391.669	54.382			236.634	922.376	860.482	822.891
		464.752	54.9372			257.406	715.765	312.761	343.554
		778.384	54.6697			253.788	1424.45	527.281	478.044
		673.176	57.109			233.791	880.705	359.966	643.744
		747.336	54.9266			263.219	1459.85	628.339	748.324
		724.844	55.5497			255.605	765.488	472.404	607.46
		647.09	68.0314			261.413	949.333	674.479	812.975
		598.967	57.9895			272.589	1008.38	437.901	288.275
		683.85	57.378			274.024	1057.75	551.306	613.333
		553.789	69.5942			269.485	749.445	389.444	319.514
		440.768	56.6134			270.023	1573.01	276.578	197.319
		546.893	64.6208			279.149	735.854	989.168	743.721
		499.844	62.496			287.829	1163.64	952.071	717.732
		451.273	59.371			232.064	791.333	599.404	612.363
		729.81	70.7606			269.659	674.201	475.491	802.884
		437.839	60.3775			266.702	687.56	418.74	469.732
		418.658	62.7105			253.826	811.562	425.531	620.304
		611.936	65.4846			251.832	674.18	394.795	437.575
		525.546	66.9846			288.627	827.326	505.079	645.258
		168.605	68.974			264.511	844.517	331.121	355.79
		167.441	53.1116			256.972	1051.55	550.801	675.537
		251.799	73.7023			285.684	1015.04	532.256	887.098
		311.698	72.0868			264.203	747.628	538.203	889.653
		238.616	69.3838			231.458	732.887	544.151	584.868
		257.57	87.2045			274.71	1265.44	674.777	766.657
		233.596	58.3025			256.195	802.639	348.112	912.112
		213.297	51.5912			261.146	988.708	362.739	826.246
		238.083	57.6506			225.42	497.034	603.458	665.978
		238.746	35.5869			237.259	997.296	677.638	1340.24
		320.864	74.8694			264.288	1343.31	1460.3	1664.03
		320.714	80.8592			286.502	467.881	1294.46	1483.64
		333.025	58.2005			221	1034.79	1567.8	1489.46
		250.147	50.6158			277.286	453.045	580.966	667.119
		308.401	63.0478			288.141	626.704	408.198	1288.06
		359.257	45.2457			256.147	637.815	390.199	1098.69
		412.552	47.7482			280.98	819.695	328.282	1283.4
		435.692	54.8478			286.047	721.114	275.652	1142.54
		274.194	46.662			247.728	942.211	311.1	1252.38
		360.91	47.1338			267.333	942.893	588.299	1088.93
		431.375	46.9548			235.792	559.745	523.014	850.841
		301.653	61.8932			279.271	1286.52	383.71	546.695
		282.244	65.8455			270.315	899.63	458.081	833.72
		283.994	50.462			274.796	905.661	423.775	904.833
		372.82	89.5591			288.827	761.891	461.088	788.706
		262.662	84.9377			243.078	891.084	1186.38	2698.45
		311.904	80.8178			243.076	813.989	451.662	1119.31
		247.557	93.8812			248.071	676.51	560.154	784.032
		276.243	88.9484			251.495	1111.39	341.644	513.589
		239.218	72.1133			266.29	1093.29	439.197	1252.03
		300.854	76.5088			287.814	1054.53	569.319	709.825
		391.764	80.6742			258.263	943.438	423.43	1779.87
		421.169	81.7648			259.534	1079.16	458.913	834.738
		249.583	101.808			278.36	598.217	564.142	1527.5
		398.191	83.2693			223.607	701.163	551.175	1334.86
		321.11	77.11			271.792	663.46	342.413	1492.22
		329.801	84.61			223.9	530.905	461.176	692.029
		384.531	79.8196			267.679	394.321	532.542	643.087
		226.353	85.7745			234.589	980.551	1021.91	728.245
		269.038	69.1388			268	426.273	468.665	835.36
		293.074	89.0992			220.416	476.51	606.218	639.696
		425.64	84.7815			263.976	811.865	897.148	707.575
		258.794	73.2526			245.49	799.525	1099.43	743.892
		299.897	70.5479			288.835	695.57	896.026	823.875
		291.9	90.485			281.977	589.258	2111.41	1490.18
		227.189	94.0946			240.078	435.853	2412.94	1449.83
		244.508	73.5747			285.244	527.27	404.817	1188.45
		266.901	64.1361			236.257	779.746	637.671	1036.12
		241.942	67.6291			262.431	703.202	599.617	1618.05
		250.347	83.6421			280.945	814.043	330.149	1277.68
		254.814	80.5917			264.239	594.761	859.317	625.57
		168.588	57.9871			277.926	611.374	498.805	1181.61
		137.829	91.1257			285.749	1095.5	506.982	1438.59
		159.039	82.7941			285.278	821.763	813.722	2110.55
		177.795	77.0692			238.747	524.584	427.299	970.944
		153.256	114.27			289.28	1027.87	993.799	2014.47
		206.709	44.3235			259.669	809.542	622.359	1601.89
		205.531	69.3782			286.702	900.315	1730.65	2638.98
		223.397	43.1293			275.581	639.581	390.22	1164.23
		190.674	25.9697			247.16	463.414	1139.69	1988.12
		186.532	45.6018			219.519	695.031	1054.79	1909.45
		203.929	53.7905			241.958	1224.34	2219.36	2569.61
		202.217	196.064			245.384	1022.51	266.557	1271.35
		149.11	347.604			265.973	621.327	391.058	1037.02
		134.324	212.592			215.937	885.892	654.661	1732.51
		214.15	193.38			3946.86	2811.58	565.99	2040.5
		311.306	172.523			3180.74	3279.43	732.742	1640.45
		198.677	232.962			2946.87	2508.57	1944.1	2351.91
		184.658	159.194			3374.77	2393.12	466.86	1710.24
		174.862	177.171			3839.53	3585.46	675.699	1147.68
		496.526	149.948			3718.57	3251.42	700.069	1059.29
		220.792	125.93			3963.3	2538.19	687.415	788.608
		235.161	174.119			2533.92	4088.6	466.969	1127.34
		263.547	156.267			3579.74	2164.07	406.592	905.834
		175.278	141.331			4022	3309.04	346.657	877.407
		226.936	159.301			3882.93	2658.8	1064.18	2537.03
		247.308	163.459			4071.89	3980.76	691.576	2164.24
		198.643	141.051			3975.02	2802.52	1314.44	1988.63
		237.711	127.77			3875.33	3429.93	467.714	1309.36
		176.377	139.475			3844.93	3785.31	611.663	1197.58
		203.937	146.479			4031.94	3039.49	442.659	1390.78
		337.253	131.064			2875.59	3307.45	565.686	1378.25
		204.595	87.7904			3562.21	2683.75	894.305	1367.6
		159.908	223.119			2805.01	2349.32	537.377	1305.8
		157.522	215.967			3370.67	2734.94	740.091	2056.04
		171.779	251.198			3991.46	2427.14	640.643	1200.71
		201.297	121.335			3684.38	2751.12	579.322	1064.66
		149.896	40.7569			2732.36	2626.45	346.432	1781
		203.479	98.7386			2759.67	2274.99	525.527	1414.96
		174.491	145.818			3503.48	2641.48	677.209	2349.73
		139.832	130.284			3587.35	3105.31	309.169	1679.88
		175.617	143.068			1670.19	2493.08	599.165	2028.25
		271.398	185.029			3650.1	3057.66	1131.21	2665.89
		149.774	112.713			2008.3	1082.11	3040.55	2920.85
		227.573	56.1063			3232.11	1840.95	3399.99	2813.94
		212.653	69.502			2383.06	2210.15	2945.98	2499.1
		259.286	55.9243			3812.11	3890.66	2165.23	2275.24
		204.824	54.7071			3649.97	3600.92	1684.07	2519.19
		175.15	56.6917			3555.5	3950.06	3075.47	2151.01
		193.992	59.1102			4033.71	3686.27	3200.21	2027.54
		294.865	56.2609			3982.19	2774.25	2424.86	2332.62
		209.585	68.8983			3935.62	3101.17	1917.62	2553.99
		181.415	76.4923			1193.71	798.401	1529.53	3026.49
		194.895	82.9054			987.77	847.957	3141.45	1962.67
		224.882	75.4448			1484.07	776.738	2979.99	3018.48
		175.162	75.1145			1384.96	3076.01	3374.55	2353.45
		180.781	74.8714			2117.16	3285.57	2829.62	2468.58
		168.04	76.8267			2147.39	3533.13	2236.16	2238.14
		153.751	66.6165			976.703	1362.52	696.155	1143.88
		137.631	60.6611			880.404	997.351	726.683	999.05
		132.49	71.6078			1950.9	1558.83	774.15	1286.43
		146.459	60.7238			1924.61	1219.48	1010.81	1397.38
		147.752	57.1317			2762.44	1262.54	605.25	1594.57
						1806.44	2413.3	378.99	1414.14
						3406.28	1895.14	606.896	1665.81
						1570.95	1405.43	442.878	937.019
						1690.42	2017.98	385.026	526.56
						1864.4	1197.46	837.783	2132.98
						1769.47	981.284	2152.94	1392.04
						2100.55	1042.6	399.968	958.457
						2105.09	1017.75	936.727	2328.53
						3274.05	3050.46	656.062	996.437
						1441.58	1120.98	669.406	1264.47
						3547.44	2746.03	274.657	1389.57
						3139.18	3587.66	549.306	937.276
						2980.99	3281.5	391.677	1415.37
						3224.56	3650.82	319.664	1709.73
						2871.01	3040.48	335.174	1825.3
						2930.45	3652.86	282	1357.59
						3387.93	3622.9	541.513	1330.36
						2979.15	3606.02	353.442	1188.91
						3356.3	2882.96	721.02	1107.64
						3425.73	3354.97	664.291	905.025
						3175.94	3286.85	635.734	990.984
						1836.7	2041.46	785.434	2057.27
						2455.8	2468.09	529.884	515.208
						3494.29	3187.01	452.585	1470.69
						3355.95	3158	461.757	811.084
						3341.29	3633.92	642.74	709.67
						3525.89	3738.86	422.531	756.319
						2208.12	2512.32	352.208	940.476
						2939.63	2577.86	508.738	745.884
						2773.51	2274.74	413.781	738.103
						2183.58	1853.71	1528.78	825.776
						2771.29	1901.52	626.443	639.884
						2410.39	2087.33	239.425	979.513
						2368.47	4008.21	521.721	1497.52
						2723.92	1887.65	305.485	1357.85
						3060.74	1846.66	381.626	1040.87
						3089.34	4004.15	591.742	1274.97
						3300.08	1835.03	850.651	935.637
						2708.52	3524.93	278.218	1335.73
						3264.62	3290.49	254.55	1078.39
						3315.13	3860.3	412.527	647.656
						2807.75	3246.58	554.012	846.467
						2936.12	2492.23	430.698	1513.34
						3091.35	2637.18	369.775	688.765
						2819.21	2719.69	374.074	1105.43
						3173.74	2234.75	387.282	664.86
						3007.96	3715.64	562.697	1004.02
						2944.41	3346.56	1003.48	2428.35
						2907.05	2714.77	415.191	713.168
						2256.7	1297.14	493.44	1600.99
						2852.47	1915.65	694.797	1520.55
						2877.74	1587.73	521.515	1215.09
						2359.89	1979.48	858.914	1667.67
						2155.62	1275.49	361.59	1443.13
						1829.26	3151.06	1554.21	1127.43
						1666.99	1368.7	339.246	1334.09
						2223.03	2542.71	479.021	1324.73
						1453.63	2871.43	581.3	2166.33
						2399.84	2079.44	476.282	884.836
						3277.75	2153.01	570.098	1645.5
						1485.97	1374.6	554.8	1215.34
						2068.51	1365.22	437.587	1737.38
						2237.77	3419.24	506.765	923.575
						2764.03	1400.7	367.122	899.628
						2930.2	1992.31	380.79	1511.77
						2045.14	2851.86	390.788	1213.73
						2197.96	3134.69	459.893	757.911
						1267.31	1509.57	723.352	671.718
						2321.31	3237.14	656.385	1170.31
						2376.94	1963.77	651.463	1678.38
						2853.85	1538.33	412.552	343.861
						2415.44	1638.25	416.849	363.254
						1495.12	1999.79	279.557	951.182
						1717.76	1767.73	398.477	743.793
						1668.19	2034.2	518.25	805.786
						2506.32	1655.05	601.673	805.579
						2904.57	1992.22	618.43	1140.78
						2515.82	2083.34	522.78	887.114
						3470.33	3380.68	858.597	1277.02
						3321.23	1550.63	721.25	1659.35
						2917	1725.28	930.98	2045.38
						3351.78	1650.03	282.725	553.915
						3445.21	2030.98	347.772	400.717
						3067.01	1541.14	405.227	1222.38
						1784.14	1448	604.369	700.26
						3454.92	3448.76	371.116	780.14
						1502.34	3334.91	436.389	733.913
						2864.71	3457.44	399.881	870.452
						1340.53	2416.96	700.172	1523.67
						782.298	717.26	474.528	1771.37
						1051.09	915.351	493.449	1081.62
						883.041	1249.54	619.45	1431.71
						891.78	883.149	334.559	1495.09
						1531.71	1794.09	600.939	1935.58
						204.494	1026.27	479.062	1999.63
								612.218	1352.04
								452.564	1236.74
								405.911	1113.82
								640.911	1055.43
								449.062	1382.97
								306.688	1358.1
								620.51	1306.65
								652.879	1749.39
								400.096	1145.37
								400.993	1929.86
								548.295	1162.98
								1877.25	1498.76
								1037.58	2257.11
								701.988	758.046
								570.464	1283.47
								318.326	1217.27
								448.025	949.165
								329.223	1080.61
								830.874	1047.11
								619.723	788.598
								702.692	1535.97
								365.071	1100.27
								286.378	1239.44
								369.295	1754.55
								244.784	1143.3
								1168.93	1583.09
								316.242	1141.41
								712.607	1492.94
								401.227	1043.37
								566.805	1322.47
								432.612	1435.53
								436.582	1108.51
								664.087	1411.5
								601.714	1170.23
								545.736	1596.87
								772.116	2137.79
								495.865	1749.77
								686.665	1130.31
								578.84	1429.73
								418.301	1672.28
								348.068	1738.41
								364.333	313.219
								2683.21	2164.61
								2258.53	2285.47
								2183.32	2768.03
								2404.15	2892.64
								2627.98	2594.19
								1940.52	3193.97
								245.781	1373.05
								2554.17	2173.21
								1944.72	2510.38
								2382.17	3169.7
								2769.39	2844.77
								1700.27	2699.46
								1948.52	1915.44
								2959.61	2905.21
								3477.17	3061.36
								265.515	1278.1
								487.861	1671.06
								736.107	1008.51
								580.657	1788.71
								617.194	820.197
								463.79	652.942
								524.845	908.349
								348.331	740.68
								574.202	1005.98
								711.376	1490.76
								601.503	676.263
								707.825	1482.7
								629.561	827.115
								591.907	1509.54
								1120.48	1557.06
								635.351	844.812
								263.75	1483.51
								550.522	1853.87
								496.106	2062.82
								416.182	1169.77
[truncated: 115 more rows]
