# Supplementary material for: Large-scale cell-type-specific imaging of protein synthesis in a vertebrate brain
Source: eLife. 2020 Feb 24;9:e50564. doi: 10.7554/eLife.50564 (PMC7048392; doi:10.7554/eLife.50564)
Supplement: Figure 3—source data 1. [file elife-50564-fig3-data1.xlsx]

## Sheet: Sheet1
ANL- (control)			ANL 12 hrs			ANL 24 hrs					ANL- (CONTROL)			ANL 12 hr			ANL 24 hr+
1	2	3	1	2	3	1	2	3		average	146.861	115.76	87.584	317.297	373.7	449.748	1334.32	1149.06	918.93
Intensity Mean	Intensity Mean	Intensity Mean	Intensity Mean	Intensity Mean	Intensity Mean	Intensity Mean	Intensity Mean	Intensity Mean		SEM	2.71746	1.68347	1.36318	6.73886	13.8986	9.20286	16.0502	12.0595	11.3698
93.0965	305.047	81.1296	718.015	170.672	425.767	806.98	732.863	284.348
77.1589	135.582	52.3213	790.361	285.904	857.471	761.837	680.338	264.979		No ANL	12 h ANL	24 h ANL
94.09	132.435	104.908	626.451	363.299	318.435	991.255	1036.82	295.602		146.861	317.297	1334.32
97.5773	196.598	94.5851	552.406	194.307	858.953	473.537	425.102	1928.67		115.76	373.7	1149.06
98.1097	182.865	115.187	519.219	198.385	325.362	508.302	424.604	569.924		87.584	449.748	918.93
84.8404	181.303	90.5432	767.371	209.727	1182.09	787.767	329.23	964.288		TTEST 24 12 P	0.00853744
72.2814	211.571	117.985	733.635	215.254	794.505	1134.89	602.194	444.236		TTEST 12 con P	0.00518737			ANL- (control)	ANL+ 12 hrs	ANL+ 24 hrs	SEM
61.4341	125.204	153.25	719.629	157.016	903.162	637.214	1022.23	822.747						116.735	380.248	1134.1	17.1188	38.3754	120.146
104.766	164.078	147.587	718.259	573.288	849.322	1164.28	607.302	441.364
285.157	190.567	255.598	645.719	524.779	893.143	1105.64	792.476	460.707
362.354	242.165	149.518	772.83	513.18	874.499	660.862	691.558	380.983
169.689	225.2	198.199	769.759	761.307	919.137	1021.49	774.299	539.674
139.108	359.863	112.192	647.545	907.597	1030.89	1511.14	787.47	514.165
219.119	314.711	179.99	647.163	980.138	995.197	628.951	895.854	535.93
235.853	363.263	193.674	710.919	253.957	970.387	663.283	580.988	498.209
189.878	410.982	183.619	678.092	474.754	660.097	754.331	705.921	385.559
178.153	58.6487	149.742	751.964	869.131	866.779	3182.35	765.677	382.06
150.867	69.9455	184.519	808.799	397.199	906.653	953.727	520.376	410.304
138.345	160.009	148.853	745.819	397.939	822.023	1236.56	723.19	846.339
141.791	269.719	174.293	744.848	470.936	542.646	970.679	569.852	1115.05
330.147	162.491	160.864	636.919	455.089	809.605	1025.93	322.318	747.763
407.653	150.438	200.199	505.304	426.99	1040.99	1120.66	384.188	923.755
430.043	149.582	128.615	566.977	466.256	683.291	645.196	907.042	950.132
437.562	118.2	191.855	467.153	477.908	1033.19	657.295	456.667	839.689
235.684	147.498	163.087	220.7	513.165	1022.91	787.423	404.121	1108.12
182.334	309.377	134.158	550.986	543.755	948.942	715.993	412.299	777.702
166.223	240.063	133.644	800.782	603.193	1005.77	814.768	612.031	970.305
166.863	205.531	150.357	580.407	564.405	389.44	2679.65	645.483	455.906
140.825	218.188	140.723	672.767	606.836	263.556	2618.61	1023.92	1048.3
117.572	145.598	145.918	657.555	375.057	737.166	1778.77	614.126	556.409
165.3	174.611	140.378	768.007	324.598	809.817	1307.73	456.709	504.59
170.488	155.118	219.5	619.396	279.57	738.177	680.291	750.331	693.281
313.031	112.564	281.043	659.2	588.373	866.151	680.955	597.912	639.952
245.162	72.2543	270.506	543.989	572.246	613.261	713.549	650.729	635.658																	s
202.988	78.1647	240.793	732.542	718.634	933.151	671.592	531.9	1022.91
193.718	87.9551	213.256	760.532	379.467	513.917	1049.7	1099.99	832.042
260.307	225.354	184.636	753.486	544.388	706.925	1712.08	612.753	1142.23
215.761	96.4818	164.333	628.853	289.76	716.489	743.52	890.548	922.249
185.544	133.538	152.227	199.238	667.625	999.67	656.36	782.729	814.063
268.239	138.519	170.073	792.038	373.548	778.645	639.019	468.285	895.066
177.093	261.215	184.959	971.879	311.284	836.757	570.522	551.172	712.979
186.231	419.221	115.527	899.372	416.929	490.802	665.21	1521.68	481.436
138.167	210.432	119.262	871.39	227.496	428.378	703.757	1551.42	712.697
130.504	265.344	107.665	866.506	186.335	458.474	742.62	1027.72	765.204
202.712	413.91	98.2805	875.032	149.831	390.729	628.408	1052.53	432.425
208.983	311.079	84.4835	777.89	132.16	372.728	589.493	854.124	674.368
212.967	329.826	57.0802	735.135	141.724	445.487	677.935	998.03	402.355
149.069	225.117	117.371	712.658	135.579	347.302	587.083	607.348	472.444
196.251	150.768	117.911	869.506	126.781	329.119	952.577	619.647	515.975
158.093	123.873	146.656	610.57	143.75	377.115	479.74	836.759	545.517
181.485	105.194	123.7	631.044	135.517	431.087	680.075	935.23	575.552
91.3033	159.278	79.9364	577.935	177.744	450.664	612.965	1063.19	1135.7
94.6481	92.9343	127.596	642.273	168.365	374.41	737.098	713.015	940.117
145.574	162.307	86.9211	459.523	143.957	345.285	901.022	605.141	650.358
147.365	234.925	98.9987	655.59	219.417	372.807	584.546	521.834	1515.48
132.658	198.829	77.4203	664.137	230.735	329.968	663.662	929.686	808.353
141.801	54.2378	90.7222	599.828	229.9	340.343	478.9	492.735	828.568
147.883	57.9676	90.4737	696.914	229.692	380.103	3019.67	620.094	789.896
123.758	54	107.431	616.798	263.942	313.68	1748.62	455.535	744.781
101.754	307.749	91.4846	644.901	314.44	352	1356.24	681.756	754.414
110.075	264.863	189.206	795.017	315.65	439.129	1944.4	832.129	931.806
161.563	150.048	133.94	660.239	295.011	368.748	1425.48	474.439	802.086
176.792	92.0189	124.753	773.973	440.954	382.882	830.638	337.478	877.858
129.031	93.0901	124.986	823.843	367.592	170.649	800.568	451.239	407.867
151.322	194.328	98.5234	713.655	446.722	228.079	822.484	772.661	445.037
85.9692	138.562	125.823	323.836	434.367	421.193	1067.01	428.247	420.067
80.83	179.523	121.234	798.094	509.432	454.826	1144.49	567.077	601.799
96.2522	225.376	190.726	434.858	439.582	350.086	1324.35	455.114	933.804
90.5895	181.577	149.338	471.035	360.79	385.261	653.284	617.555	870.434
124.264	219.638	115.275	398.166	317.324	436.73	1414.96	660.414	1032.33
107.813	229.186	134.767	278.802	317.772	432.872	1945.75	501.851	763.228
113.825	410.004	119.796	437.425	398.963	356.774	1805.59	544.584	931.244
108.934	400.07	134.181	414.058	483.793	328.585	2300.91	655.604	741.537
115.449	292.605	107.924	465.548	211.498	323.85	1724.08	886.729	1026.1
110.459	271.779	154.555	394.586	191.421	125.411	2153	626.282	845.522
134.609	211.385	109.919	265.799	150.38	601.037	1257.06	470.764	774.566
156.01	189.724	138.314	238.75	199.106	978.536	1246.19	358.231	990.472
162.941	232.466	115.446	284.242	284.986	769.747	2024.99	361.161	565.472
159.869	187.083	126.093	333.448	259.435	695.451	1604.56	411.473	802.159
163.849	218.424	177.717	229.183	276.258	733.138	1146.26	430.155	927.966
101.277	155.244	181.073	500.528	330.318	600.273	671.57	2016.62	824.717
191.241	114.948	103.519	294.69	331.411	895.167	709.044	1408.98	554.42
86.5074	182.625	136.309	272.024	347.529	405.289	722.341	981.713	947.561
109.688	126.873	113.128	275.471	312.836	502.051	942.269	1346.15	485.665
134.062	110.603	106.779	393.827	331.191	328.741	1578.04	1448.96	377.771
204.439	132.144	101.961	303.229	355.247	692.181	1084.24	1096.45	931.06
205.262	121.513	114.436	344.843	381.149	537.384	824.469	613.699	373.166
160.433	108.532	178.978	312.653	356.048	234.46	2919.54	1438.83	1137.93
203.723	131.561	186.514	306.256	422.488	287.654	1941.81	1293.05	637.493
149.715	158.08	207.839	331.863	358.199	795.667	1864.22	1407.22	1107.55
130.261	127.175	213.95	272.088	172.887	579.213	1837.3	626.182	1123.3
157.06	129.133	190.573	226.629	177.768	837.093	1466.29	1221.78	988.583
139.309	125.806	185.907	312.32	163.58	796.973	1925.05	1324.84	966.832
127.684	211.367	199.333	268.561	191.498	793.381	1537.71	1193.76	871.897
138.373	195.509	197.272	244.203	155.87	546.81	854.799	843.515	905.153
147.505	200.927	184.529	238.258	186.276	893.386	1628.8	653.599	411.75
164.313	117.589	238.053	225.281	196.063	665.257	1345.65	575.521	1343.52
155.936	120.165	177.642	217.738	226.244	687.794	835.791	541.981	1002.16
129.113	128.743	124.186	213.916	182.956	791.41	1489.52	1282.71	741.921
175.417	85.6726	228.213	217.362	270.419	844.469	873.165	1404.53	976.307
168.264	131.064	110.892	219.231	252.897	749.184	824.722	2201.77	1178.7
128.344	164.543	138.611	210.266	265.606	1097.25	1575	486.946	1443.36
153.843	102.903	180.768	286.548	212.126	430.965	946.661	1163.57	1274.61
178.813	119.477	122.815	335.53	276.733	376.05	2155.59	605.821	1185.13
185.447	189.046	127.067	172.148	116.805	459.498	885.558	784.082	1100.17
178.774	211.465	163.086	326.85	207.773	499.204	1706.42	690.261	1816.11
140.32	207.476	170.883	286.687	222.681	218.348	1000.19	624.304	1008.93
178.244	178.316	151.272	292.44	155.572	363.378	1172.42	495.715	678.494
140.727	219.132	165.092	309.38	204.061	623.729	1349.88	480.577	1214.28
144.145	199.423	124.414	402.483	173.907	676.185	1358.34	459.185	701.031
177.8	199.146	155.98	368.45	270.321	696.037	1996.26	1072.73	886.163
214.251	213.339	81.5816	426.554	289.991	308.59	2245.55	565.812	1429.75
187.701	114.166	94.85	344.631	302.538	389.935	2822.85	571.535	988.712
180.226	214.424	246.8	342.762	213.566	928.436	2340.61	517.048	931.915
187.913	150.501	262.571	358.635	206.603	361.724	1766.15	531	1899.16
140.888	223.363	253.193	333.619	204.336	358.736	2407.37	569.361	711.364
164.468	166.912	130.854	267.997	229.745	433.815	1662.24	1043.16	668.272
178.427	204.315	113.942	374.106	227.737	674.576	2514.5	1117.49	744.815
166.106	130.763	117.261	400.024	195.253	336.009	2563.39	1905.59	687.857
141.732	122.338	82.3612	345.956	238.659	507.387	1792.94	995.372	547.503
130.824	111.337	95.7165	292.307	215.004	243.256	1983.92	807.197	1694.73
160.338	103.067	7.66234	201.046	233.635	437.81	931.711	861.938	472.623
154.917	109.36	162.085	231.651	179.904	299.994	642.055	1063.15	878.028
140.978	112.204	130.097	262.337	197.837	331.329	3016.84	1299.42	1005.46
141.958	189.981	133.152	215.579	230.733	345.402	3787.27	1254.25	503.834
155.964	211.653	131.893	197.473	154.99	283.802	3369.46	1044.81	698.497
156.281	169.43	106.143	281.053	223.677	386.09	513.293	946.125	1137.75
163.361	160.134	123.322	176.372	221.57	389.861	2454.46	860.663	782.814
174.419	142.389	83.0219	195.866	200.805	352.288	1303.08	598.277	470.027
171.383	141.72	141.792	258.287	158.412	373.223	2521.13	444.265	718.961
184.872	153.052	169.745	213.249	118.563	278.76	2593.31	965.298	612.256
183.413	182.937	116.323	188.644	149.984	289.726	2640.64	582.62	728.321
180.603	158.836	142.746	156.355	170.877	348.748	2630.83	404.828	871.769
164.967	238.021	146.483	258.613	169.417	291.891	2175.67	561.225	1344.13
159.988	170.432	147.049	226.596	135.206	203.521	2208.42	613.339	724.531
167.115	98.5057	139.601	321.44	158.194	481.508	1380.9	716.32	1048.49
171.978	112.27	158.798	316.152	132.457	567.968	1344.62	947.228	1428.75
137.926	104.818	119.491	224.878	199.132	329.31	3115.34	670.438	1545.15
155.545	113.021	153.776	182.731	180.89	334.1	1891.39	1809.08	1054.34
154.805	120.077	108.024	235.126	192.577	361.283	1346.61	1346.46	1634.11
107.873	114.287	112.918	218.757	186.65	313.382	2857.96	1668.11	954.49
179.064	112.855	133.503	179.137	199.562	327.058	1122.43	1247.94	693.129
204.595	106.534	107.416	184.937	205.776	392.189	1692.25	873.17	1078.66
194.988	82.7594	104.408	144.086	203.223	351.387	656.055	1247.65	713.285
177.196	93.1405	107.888	284.769	182.077	304.178	1014.69	639.065	734.723
141.033	90.1789	148.769	142.505	198.857	292.53	781.9	959.292	720.771
90.9779	94.6996	143.587	164.226	196.996	411.995	863.868	643.248	784.972
94.4481	66.0784	137.106	173.212	216.945	375.605	1529.09	749.597	860.79
106.932	73.0726	204.401	148.41	186.764	454.071	1041.21	635.316	869.529
111.981	70.9714	151.315	161.768	173.871	293.67	916.192	576.25	742.76
174.048	155.745	129.561	182.263	187.641	293.364	937.609	640.401	698.518
182.88	108.152	178.079	162.07	176.865	486.966	1228.53	923.945	704.673
165.535	132.514	73.535	181.812	208.019	425.751	3861.18	788.53	614.561
207.422	112.605	85.7097	163.748	138.263	331.578	3077.71	702.124	610.425
176.723	106.376	89.3789	334.969	106.812	341.906	3659.17	488.913	1320.9
155.603	115.434	91.1938	284.988	151.231	412.26	1973.26	862.156	675.384
150.677	109.95	82.1036	239.899	183.596	474.328	1884.57	1162.98	659.082
144.243	89.3511	63.9526	337.253	117.268	367.241	2284.71	1374.83	1413.22
97.4785	116.936	84.6978	269.572	149.31	351.615	1599.28	1654.52	890.619
112.075	120.51	152.837	267.694	105.136	284.777	1684.93	1232.42	1226.61
115.22	100.262	151.304	262.988	338.731	331.052	1229.91	642.603	1082.8
136.625	103.417	158.08	253.239	309.02	496.667	881.115	469.648	1052.38
117.314	106.381	158.941	158.563	269.612	331.593	1357.67	805.818	1032.49
107.458	114.327	153.552	278.89	258.712	320.434	762.272	943.695	1051.94
114.223	154.063	152.231	254.244	229.351	384.459	715.511	813.675	870.757
112.268	75.471	141.993	287.01	258.783	353.234	616.149	782.394	717.958
115.195	27.8997	122.053	283.783	228.922	338.519	563.856	1184.27	474.308
130.565	116.995	122.632	300.961	336.685	332.68	828.385	1280.91	1450.08
121.012	156.357	134.285	255.853	225.347	356.628	727.472	3827.16	1031.94
122.916	148.867	125.192	271.101	310.356	140.595	1015.63	1943.05	1170.69
118.834	105.114	107.401	162.295	225.241	369.013	1018.39	2142.24	932.229
124.504	87.5458	108.273	242.464	260.171	410.786	982.883	2617.4	1076.48
118.535	135.602	106.179	220.57	256.529	312.18	1065.21	1317.22	1329.3
125.524	179.984	110.049	301.484	296.028	374.615	1362.77	1176.23	1554.46
121.195	88.8642	114.63	261.743	217.736	342.256	1676.78	894.543	1011.57
114.183	155.941	85.0478	266.383	236.042	312.326	1000.67	507.253	304.706
99.522	83.7136	124.466	302.794	284.28	302.646	2727.63	694.478	979.433
159.719	124.661	181.983	241.913	242.671	328.564	3301.87	2348.69	963.107
123.718	89.0887	172.565	276.638	231.619	396.122	3269.42	1608.21	1129.06
113.183	156.375	181.697	151.788	237.168	298.852	4089.5	2024.36	940.968
109.915	33.6622	139.794	266.142	244.617	273.989	2070.76	963.653	1464.91
124.464	173.95	197.219	247.937	233.847	293.017	2086.52	878.023	822.531
117.682	131.496	163.263	257.384	216.223	430.262	2057.36	1513.7	849.102
125.948	145.767	157.525	263.461	200.048	365.284	2086.99	3906.44	1083.06
132.6	177.165	116.174	292.537	166.251	419.721	3915.08	1577.07	868.47
125.747	133.303	193.07	248.165	200.951	453.97	1936.7	3016.21	715.188
122.122	105.974	156.721	276.956	132.315	464	2003.95	1662.95	693.708
152.807	117.657	173.753	221.568	141.776	352.619	2022.82	1419.09	687.318
143.225	184.915	119.021	302.653	225.058	324.277	2883.09	1565.53	839.288
144.528	161.221	144.837	189.828	282.891	461.024	2644.11	1532.58	695.397
100.255	198.556	178.651	408.946	176.801	452.46	1900.7	1423.98	997.531
99.76	196.815	140.62	304.771	150.361	371.052	3006.3	996.484	1071.8
98.9062	169.815	139.607	361.657	158.115	314.443	1305.85	606.274	763.132
135.246	158.6	163.893	338.245	197.837	379.219	1978.15	1344.08	828.801
83.48	126.312	157.991	397.62	175.84	356.389	1863.42	1482.51	803.406
98.5337	115.867	118.87	386.222	184.935	312.846	2227.31	1725.45	797.873
148.168	129.305	144.204	321.735	243.265	288.176	1628.96	1073.78	582.848
112.791	120.386	124.234	344.925	177.46	561.624	1755.82	822.782	978.138
127.695	115.664	144.926	451.663	168.959	392.68	1960.01	317.374	880.213
138.382	64.8924	165.746	399.496	170.503	351.562	1467.18	1077.64	630.121
134.401	242.909	157.113	326.465	165.68	444.427	1389.55	1104.34	774.604
162.641	253.854	119.129	338.253	188.083	307.058	1325.84	818.953	552.113
135.8	232.301	128.15	416.14	132.757	434.626	1784.13	756.998	748.446
153.806	206.649	147.686	545.749	207.507	318.934	1883.38	560.744	974.866
158.59	121.513	111.326	407.552	222.207	379.611	1118.94	804.061	1133.36
171.873	129.357	117.052	402.546	155.268	326.813	1037.35	3317.64	833.156
212.781	135.922	115.083	404.206	196.352	451.516	1472.7	2009.92	990.289
164.409	127.31	76.3529	384.06	161.274	357.734	948.492	1987.09	1192.18
150.595	79.9486	75.9893	604.453	160.789	300.059	949.614	738.356	694.041
188.399	92.7907	94.2667	328.919	130.463	333.829	1740.09	669.928	637.92
255.009	99.7524	61.8881	319.438	126.462	438.419	983.614	797.363	828.843
246.432	93.6069	54.6898	345.359	157.911	434.193	905.807	1274.07	839.368
163.345	88.2159	54.2556	336.523	130.804	456.421	566.143	380.304	723.908
147.517	54.6139	53.7906	356.839	121.096	416.267	1023.6	666.963	936.205
141.655	69.037	55.3254	308.872	104.456	257.504	1499.6	1380.44	741.857
147.644	87.728	48.3526	301.619	108.179	258.144	1538.01	507.102	995.539
152.908	157.046	62.9569	347.367	93.5871	281.972	1418.55	643.326	1590.22
55.4462	142.058	51.7555	207.281	122.505	220.081	762.912	519.793	1466.65
77.6741	105.422	159.264	588.007	164.418	309.963	1710.28	492.168	695.408
85.0815	110.215	162.581	532.57	180.914	274.886	745.847	818.718	1150.37
84.5793	178.104	170.569	458.859	157.002	302.254	859.6	1246.64	1209.01
89.3974	192.729	169.882	652.754	129.704	309.615	1613.79	1803.73	678.336
86.6049	147.001	136.274	523.137	136.724	303.365	2953.8	1673.88	1174.38
87.6102	143.211	166.488	705.5	143.799	365.749	1614.69	3340.67	738.044
99.0705	138.44	155.446	334.415	120.689	340.147	2493.83	1570.29	1151.45
95.1719	213.821	71.253	526.622	151.392	378.867	3461.46	2719.36	1368.54
100.111	138.959	66.3866	593.816	206.899	339.238	3068.16	1671.7	714.29
94.7721	132.194	57.461	607.917	196.281	372.955	2229.98	632.655	1579.35
101.611	134.521	63.0077	723.527	179.803	483.553	1879.46	1023.96	722.816
98.402	112.237	66.1081	642.286	180.099	390.105	1770.84	1433.83	1163.09
84.574	121.096	144.316	710.32	210.947	310.311	1773.77	746.497	1074.64
79.0122	101.969	114.237	567.83	240.392	310.829	1978.97	1219.11	903.631
99.9164	101.232	59.145	583.093	243.777	296.351	1321.53	1068.79	676.382
80.7461	93.6864	57.9409	225.831	202.18	273.559	1452.67	1054.29	666.531
83.5878	109.211	78.8282	388.74	179.904	346.837	3220.84	1474.83	756.674
118.677	105.771	71.5809	261.725	154.181	363.091	2913.04	1625.27	1095.48
96.9485	121.706	58.9749	602.768	206.587	290.062	1811.71	1862.46	760.057
125.798	108.529	58.0655	527.86	171.164	265.633	1704.12	2068.48	973.571
113.48	102.1	139.975	644.109	156.881	312.485	2080.67	1639.47	1534.71
89.9094	88.7216	69.8609	614.764	132.372	386.785	2864.95	1624.56	846.034
106.678	98.2465	60.4489	670.596	201.967	390.583	2604.51	1189.67	912.876
117.392	73.0794	58.3134	607.404	182.764	363.204	1400.38	2615.26	986.468
91.08	78.4819	63.2694	266.7	196.128	403.097	1241.49	1591.97	899.94
100.648	82.1755	75.0179	258.572	130.57	394.736	1288.71	1659.14	1055.3
124.561	179.049	83.523	268.156	174.065	405.071	1286.17	1487.29	965.243
103.438	97.0057	64.0417	237.703	221.682	399.775	1705.41	537.09	974.24
107.078	115.287	73.0094	222.076	236.195	279.129	832.363	1260.1	940.903
104.846	93.251	75.8646	223.91	223.921	332.358	983.95	1429.8	1226.4
115.686	59.5468	75.5798	281.101	202.512	323.428	781.014	1571.91	1314.05
102.486	64.7664	73.084	426.707	194.465	353.456	650.501	2831.14	1262.03
104.327	78.0929	74.6025	804.248	209.789	312.309	776.996	1744.77	1029.39
135.554	85.7338	75.0543	911.696	989.442	347.129	2363.27	2449.45	939.437
150.034	118.01	72.7391	548.441	896.832	498.674	1416.87	1392.88	1061.09
167.116	65.3111	69.886	743.434	929.721	458.25	1335.28	928.326	925.911
148.801	95.7612	58.0483	240.269	945.056	474.164	3334.07	3179.62	944.841
155.32	83.6988	97.4728	265.994	911.412	394.126	1328.43	1629.46	1510.75
145.372	113.368	93.7954	461.548	797.225	402.881	1075.3	1774.84	1164.88
72.4094	38.4812	76.1277	750.456	871.482	436.389	2886.79	1723.43	1775.56
66.8346	120.958	74.174	207.535	859.119	440.781	3345.01	1606.56	723.175
83.1579	37.8506	78.9343	601.469	945.005	426.797	789.199	3040.75	668.108
78.5464	47.6503	63.6486	490.43	375.524	464.231	1036.03	1433.7	472.869
84.567	67.9162	76.7073	653.807	1068.23	465.298	2291.29	1210.4	842.015
69.5246	78.9841	67.7829	765.12	432.273	333.459	2792.84	1728.99	708.321
97.331	86.0684	66.5753	488.538	413.707	398.8	2589.17	1551.04	656.161
97.0725	86.4751	69.4664	277.145	465.774	342.221	2793.94	1530.18	631.943
102.175	33.0928	67.7005	628.031	830.389	456.636	732.289	1300.79	665.676
98.7225	44.023	49.0161	623.627	589.904	438.659	2535.77	1750.37	1063.99
116.619	89.2992	82.2737	293.401	1003.15	417.195	2387.92	1845.2	560.99
191.47	90.9273	107.598	262.65	878.455	390.408	1188.06	739.193	1081.33
135.365	86.3264	132.223	242.605	757	419.552	1530.95	687.265	819.28
144.454	128.862	114.885	420.986	773.276	444.244	1400.48	834.977	1144.98
187.387	162.3	126.138	417.481	821.72	400.286	1391.15	951.127	692.965
163.226	201.27	120.047	297.975	367.764	508.539	1014.8	2671.82	767.768
164.864	169.197	102.172	295.714	389.547	397.025	1593.56	1086.14	868.463
144.457	191.908	112.588	301.721	286.559	562.402	975.095	1769.6	877.661
153.793	180.272	112.949	635.026	191.328	355.952	1417.57	1371.36	826.268
136.531	186.502	123.736	269.71	1147.12	466.73	972.467	1545.63	767.324
146.265	140.504	127.514	270.813	639.404	386.141	856.613	1544.31	941.499
158.746	125.014	127.841	745.755	761.118	400.781	2151.61	1851.93	761.201
143.38	114.762	80.1809	271.833	239.013	353.975	1306.15	1084.35	982.364
143.836	108.066	63.7855	474.135	510.739	526.425	1097.78	824.194	605.573
119.609	140.333	64.407	244.252	655.925	369.268	1967.29	1055.6	543.871
133.608	149.904	52.7715	308.19	759.024	372.058	2000.87	1131.83	727.873
149.283	143.847	57.378	327.855	196.687	430.462	1060.67	693.051	467.705
115.208	128.198	49.8791	307.984	396.736	461.048	1879.41	2212.38	1106.84
138.956	106.235	52.1323	248.375	472.425	446.558	1036.8	388.961	740
168.222	100.532	29.034	219.695	293.557	524.639	1351.17	1081.52	473.563
154.235	146.765	56.8957	180.634	162.697	411.669	1948.61	1225.56	941.429
150.36	92.9965	35.4453	276.28	341.519	604.118	2761.34	1243.48	874.004
193.164	92.4478	32.4792	538.022	306.176	408.222	716.312	1659.95	715.194
206.513	97.3456	31.3211	287.353	272.211	556.252	936.88	1721.47	910.479
188.258	69.7367	31.4039	286.946	269.841	620.702	727.76	1774.85	1315.28
178.497	76.4384	38.0123	212.149	267.75	406.769	1266.53	1464.92	860.972
180.784	76.7174	45.1826	213.287	229.719	429.587	1127.21	2894.25	968.226
212.039	74.3898	49.7082	294.37	256.011	482.144	1046.45	1554.39	750.372
204.434	71.513	57.3681	280.11	160.216	467.96	948.62	1063.87	1859.86
166.547	75.7852	74.0174	313.434	244.983	366.875	1059.9	1724.44	765.493
156.832	99.7072	73.2606	303.389	230.929	417.162	2068.48	1720.52	1102.78
125.561	96.2859	74.4181	288.981	357.197	552.47	1648.03	1949.96	82.0875
104.975	86.2557	81.4352	342.539	386.24	552.517	1778.42	1645.14	803.943
72.6804	73.5127	108.019	459.164	241.392	361.712	1867.7	1974.87	669.098
105.303	77.2481	94.5218	443.028	406.31	135.577	1979.77	1680.26	869.113
130.285	94.1946	67.7593	195.517	270.176	314.876	2609.09	2333.75	552.186
130.442	80.3502	59.6168	247.345	163.24	348.039	1943.04	3860.69	637.924
95.2577	88.8014	59.99	313.147	176.525	696.901	1611.87	1262.7	708.985
102.491	97.4404	50.6897	185.859	144.224	747.449	1239.48	2234.77	753.325
85.4409	88.571	55.7708	216.098	157.009	810.995	914.289	990.305	1298.35
85.4735	74.9167	64.6424	240.13	205.773	880.271	1229.89	1093.91	659.337
81.5312	97.1124	61.8446	213.978	199.106	940.552	963.028	1137.1	906.215
79.2049	72.7736	52.4851	212.07	327.489	720	1067.79	429.874	960.317
91.9595	63.2828	52.7061	228.349	198.327	1062.15	754.413	523.627	719.13
74.1587	68.4819	65.6733	281.39	227.181	942.427	1037.48	536.36	530.24
103.517	48.8601	68.5119	307.274	210.254	1003.77	598.73	447.483	751.532
106.884	63.3286	50.944	282.159	168.261	1017.94	1133.07	1078.41	767.07
95.5339	60.7086	63.6686	418.417	198.457	989.237	2366.73	911.837	1000.64
98.7488	60.9461	61.6089	341.399	200.337	587.897	2068.02	918.224	883.116
98.6355	59.664	63.1025	356.895	189.787	742.986	686.653	1197.21	755.413
121.507	116.844	70.2038	378.624	213.16	820.435	749.508	1344.3	532.494
103.513	88.1925	68.4357	307.198	203.667	890.52	1267.56	1886.26	680.438
90.1518	104.404	69.1851	383.426	203.706	701.85	895.951	1159.69	742.752
92.5685	89.058	70.269	241.037	164.781	688.658	1540.62	1874.3	721.117
96.1043	97.9377	78.039	177.815	204.475	726.143	1209.21	1455.19	518.478
90.4615	85.0581	76.0836	215.003	224.081	534.862	1988.15	1967.02	582.147
189.458	94.7663	74.9848	211.777	210.31	646.171	2096.39	806.25	344.529
143.045	95.804	69.5667	196.081	158.588	813.08	1701.44	1772.36	499.29
122.246	77.0795	106.242	205.275	120.829	499.925	1793.93	1346.51	894.344
111.38	81.0856	112.223	160.522	193.735	478.398	1672.23	1117.02	590.167
127.253	90.6338	107.014	269.186	148.608	430.68	1599.41	1408.71	1037.55
106.744	83.306	84.1476	304.054	188.421	714.765	1637.9	2238.89	847.997
138.105	80.2844	87.3889	279.187	193.739	544.29	1640.22	2615.02	776.756
106.12	78.113	88.0498	306.156	167.531	679.428	1562.17	864.038	776.622
107.797	85.1527	76.8413	212.532	328.377	840.392	1712.78	1717.44	958.578
113.488	69.1685	82.1846	250.393	315.894	1024.91	1525.94	3510.35	755.523
122.154	87.4598	96.2879	287.477	316.984	897.202	1413.19	1439.86	794.795
119.092	83.5733	60.9896	243.78	277.457	343.508	1845.34	1620.24	512.736
130.524	82.3191	63.3827	243.852	375.938	794.124	1447.72	1486.12	963.474
123.182	57.8294	65.7278	238.376	290.156	625.843	1463.95	1329.35	364.491
143.51	105.368	73.2617	224.989	327.098	874.413	1335.9	1358.51	541.661
167.94	148.429	70.5	175.73	626.99	662.839	1344	3807.52	835.937
216.823	132.786	65.25	210.422	767.123	634.5	918.467	3243.82	988.163
193.235	87.5077	76.9408	197.513	700.292	850.881	1468.49	1615.69	1086.11
153.943	87.9495	96.9208	234.435	700.611	504.317	724.715	952.462	938.657
205.775	100.785	90.9188	188.22	787.148	682.476	718.049	3456.93	849.669
94.4646	94.3099	86.759	194.185	684.377	941.538	639.801	3025.06	1007.49
97.8382	99.5094	85.6743	242.488	738.115	1097.24	1018.74	1419.48	896.373
116.286	98.6259	109.512	234.925	855.899	654.172	802.446	536.946	686.496
113.376	151.73	176.27	228.549	969.708	696.789	1127.96	753.531	427.328
61.5476	110.794	94.6808	208.456	849.756	566.921	1792.36	1423.12	477.461
116.818	90.5879	98.2465	156.55	600.1	837.917	1198.59	1403.28	649.739
118.383	90.2917	91.0817	219.114	1038.28	944.595	1476.04	1507.57	508.681
96.7934	121.514	84.0551	148.9	621.127	1025.28	2252.3	1433.32	425.215
87.2214	88.3708	146.721	276.117	1021.97	462.14	1147.64	1307.45	466.813
162.594	90.0712	187.204	230.114	1053.01	236.34	1129.96	1062.28	577.336
132.654	92.996	130.158	241.394	904.26	460.263	769.249	1077.93	369.774
107.307	92.7428	125.752	477.885	845.762	416.698	1299.85	1300.12	498.995
105.7	87.207	90.228	426.051	997.504	397.554	1451.65	752.143	557.718
136.82	83.4216	105.237	282.067	962.505	377.863	1580.21	677.596	772.351
117.303	92.5103	129.693	372.452	799.838	429.752	1151.92	1512.22	454.818
126.576	93.9287	107.61	335.094	1070.56	436.944	1008.49	1483.44	680.331
106.263	96.7894	105.15	176.812	1086.82	389.312	667.636	2553.53	624.316
135.744	91.3677	70.8884	278.671	1104.37	449.436	952.268	2004.36	739.08
108.467	82.5192	68.7705	271.813	1149.3	458.714	2503.71	1621.41	735.612
128.404	79.576	62.6173	317.901	1122.54	320.423	2137.97	1668.68	592.347
87.9081	82.7272	52.4644	334.162	1042.73	381.038	2021.71	1570.79	709.022
89.7259	85.1747	72.4181	327.947	882.589	335.336	1895.94	1638.44	760.789
93.5433	75.6892	57.3299	334.683	913.655	490.791	3281.99	1038.23	759.284
116.043	83.5689	62.6838	432.442	1020.33	365.542	3603.3	1542.23	970.059
105.621	97.4508	54.3602	312.08	1160.92	449.722	1610.14	1469.88	945.266
120.899	81.9805	65.2395	238.333	1196.57	275.645	1475.26	1643.56	629.48
111.284	98.6898	63	231.287	973.832	313.89	1458.55	1570.37	667
112.106	75.4951	58.5	293.261	1053.1	382.092	1801.18	1803.83	679.566
115.6	79.5742	57.8103	211.258	1057.7	359.497	1464.54	960.821	726.77
105.11	84.7829	66.4525	281.54	893.221	417.367	1313.18	489.842	730.992
105.726	77.7861	54.8364	223.374	1057.93	311.701	1571.89	1451.62	1265.54
111.153	71.9458	47.2446	244.127	1394.48	359.549	1517.84	1142.28	697.169
134.583	77.5242	49.5338	344.813	1236.29	415.5	1883.52	949.665	688.679
132.834	77.2565	49.2352	206.743	1098.34	328.308	1885.31	937.751	591.696
94.8633	74.2557	56.6338	288.426	1592.14	291.541	1544.21	1090	648.465
99.4976	77.8512	55.8478	217.823	2307.45	342.883	1536.61	711.245	547.514
134.474	73.4653	54.3273	193.599	1229.94	336.374	1378.56	513.774	1242.01
156.171	64.3951	51.1191	240.39	1551.62	308.604	1322.51	1019.74	733.214
38.1979	66.4511	50.9851	273.412	1453.47	264.714	1416.54	991.429	744.36
88.3988	67.8905	52.5625	223.086	1680.34	314.81	1433.57	1672.69	246.42
59.6282	61.0016	49.3839	208.371	1476.26	319.543	1384.64	1485.81	695.795
66.8521	56.1046	53.9787	230.114	1284.8	347.874	1022.76	1085.83	336.234
70.0193	69.2228	57.5247	184.22	1864.55	319.767	1115.51	1559.97	479.054
55.5861	76.2385	58.0241	229.983	1655.41	348.245	1126.75	1374.02	1250.26
71.1931	87.0668	57.7785	199.247	1069.43	325.318	1583.84	964.164	1693.28
80.5934	47.2976	67.3609	448.688	1257.5	280.991	1594.33	1704.19	1121.03
88.0929	126.517	55.4685	239.875	674.145	308.445	1204.72	1648.8	1074.58
107.794	70.381	60.7394	255.977	1553.8	377.625	981.589	2130.6	631.818
92.2446	63.7259	58.0833	253.911	304.726	386.573	2531.79	1689.85	511.121
80.1377	62.7853	58.6561	156.181	342.58	367.616	1607.05	1990.79	898.357
93.3614	61.194	66.1198	241.737	511.253	345.283	720.97	1777.1	587.578
89.4709	64.0079	67.1126	150.867	318.591	366.36	803.419	889.939	1084.44
96.4762	65.2669	66.4722	186.455	344.054	330.5	726.668	1480.73	836.437
104.067	71.6159	80.763	184.663	223.498	355.201	822.317	1175.96	1609.83
94.1195	69.8429	85.3771	177.042	288.754	423.912	922.008	1336.54	866.717
100.519	70.2074	98.806	164.892	229.882	427.737	645.757	1058.04	706.33
97.9314	70.8434	52.0606	191.944	240.964	730.747	747.189	1619.83	1959.57
94.0791	75.3835	67.5634	180.525	232.395	837.835	1041.27	1761.94	964.484
109.87	72.6128	71.3311	210.319	228.088	865.047	650.107	1711.22	1141.71
91.4032	75.047	67.8864	204.897	273.742	910.868	751.638	1468.31	692.886
97.6374	70.8488	60.8158	141.014	214.769	1031.28	679.137	1735.61	1018.68
93.7549	73.6886	76.5105	272.614	225.297	365.216	3629.02	1046.16	830.349
27.2632	79.5929	62.1668	234.258	228.961	292.704	2196.13	1627.01	963.266
109.238	74.3638	67.9089	251.636	237.349	262.63	2460.43	1546.49	981.056
119.957	76.4104	55.8179	262.894	331.166	382.235	2856.77	2749.07	596.231
116.947	72.854	77.0392	253.533	250.804	257.212	1389.41	1567.2	1022.53
99.3761	78.9173	85.2466	234.727	217.171	306.126	1605.37	1663.88	731.891
97.1712	71.3758	79.1071	189.573	215.197	310.526	3469.69	1689.28	1076.21
97.1128	90.3582	70.0636	214.467	269.557	334.31	1847.42	1755.43	690.677
95.5	77.3274	67.9704	196.746	298.289	377.184	2965.64	2361.95	816.376
78.7307	86.1984	69.8477	171.6	216.39	261.794	1650.89	1457.5	438.134
79.25	68.8948	66.3339	182.735	248.597	384.868	1670.69	526.35	619.582
96.7523	83.2195	57.6746	177.342	191.136	479.116	2325.49	1451.78	327.871
176.083	78.0608	53.3059	196.616	235.669	508.929	2756.57	1573.9	277.952
162.746	71.9177	59.2817	204.42	217.457	486.208	2985.72	1191.72	551.518
91.178	91.5431	67.3333	174.624	204.164	516.075	1407.58	1339.99	898.231
87.8844	85.2224	69.0833	152.361	104.621	370	1912.37	999.94	541.241
117.325	98.2361	57.1634	178.52	449.425	406.63	2747.92	1580.31	256.21
107.486	54.1323	55.3143	170.557	428.382	455.346	1506.74	1282.3	584.869
105.639	55.8868	52.5949	223.324	188.034	470.092	1234.79	594.751	467.771
101.958	54.6494	44.1261	240.989	563.183	364.972	756.725	840.26	851.104
148.892	61.5791	43.612	155.24	478.561	409.194	853.561	476.106	573.874
143.151	62.2043	41.3152	177.381	316.803	287.848	838.485	607.288	569.463
145.569	53.4929	45.3879	157.355	232.895	418	1933.92	612.27	746.325
134.525	57.7645	45.4141	222.802	228.206	782.782	877.15	641.173	576.794
124.188	82.9927	39.2394	203.459	219.436	900.307	704.425	700.815	667.676
139.979	79.9688	53.5274	228.144	332.623	893.953	975.968	3452.21	798.679
148.186	79.9984	49.6321	210.899	196.253	609.283	1318.53	1674.3	2119.65
113.43	73.1253	49.2362	267.991	221.571	761.715	1418.47	2397.88	683.505
58.093	83.8244	45.4805	299.813	213.5	213.273	1870.2	2919.76	407.78
77.0374	98.2836	46.7087	252.162	223.948	228.927	831.17	1885.95	628.344
84.5219	91.3904	58.715	273.685	209.222	186.374	1364.41	2609.52	789.166
83.8471	69.4025	62.7223	155.623	227.461	198.817	1058.34	2030.92	757.287
77.3694	73.5671	61.9071	163.966	297.686	272.946	926.832	1289.12	2089.14
86.6202	66.5131	58.2391	295.781	216.84	226.081	1110.72	1145.02	1844.18
90.8845	68.5309	59.2069	257.077	168.402	209.197	1308.23	857.209	774.971
74.1919	80.8063	57.26	282.669	205.028	273.234	862.601	608.94	1608.33
93.0992	84.3138	61.3153	320.598	233.737	254.729	1675.22	1119.43	2094.37
35.1121	78.8588	57.6066	300.921	341.767	238.223	1136.44	1297.63	1749.79
102.813	85.5108	66.392	294.245	442.015	268.189	702.192	1553.98	882.456
75.5449	80.7672	58.1431	223.979	209.168	238.463	1513.42	982.401	1833.42
93.2248	88.296	56.9513	214.492	222.096	318.13	1530.22	1724.09	797.198
83.317	68.1575	63.3809	272.367	217.949	243.298	1575.64	1051.09	896.958
94.8646	57.248	57.3625	282.785	255.424	192.027	1566.05	1061.93	722.643
82.0159	65.7847	63.1519	205.033	239.179	216.537	1780.22	1307.07	1047.08
92.2527	53.7308	60.1826	254.967	205.067	233.293	1717.73	1493.32	619.334
103.438	67.5	92.1991	153.482	231.052	225.112	1118.83	1158.07	603.09
88.8714	79.4762	40.108	150.638	238.021	183.469	1261.58	1234.13	577.629
77.9785	64.3869	34.8824	198.827	231.174	316.635	1736.78	1090.92	628.529
86.5721	72.7495	29.4983	338.82	220.25	292.005	1400	912.275	768.128
98.6492	77.188	43.5281	290.389	230.895	231.863	1183.93	1043.79	703.616
101.972	88.9829	42.4046	247.784	216.675	172.872	1220.56	2374.2	451.695
101.957	68.1908	77.1423	305.037	230.97	250.049	1096.94	1684	1021.61
122.832	60.3471	77.9893	244.408	219.452	246.595	1446.94	2129.38	479.084
88.3887	84.338	56.378	243.35	160.343	288.105	829.257	677.156	441.183
88.9553	69.4502	49.6959	107.112	177.01	224.47	1224.57	1381.86	896.13
117.304	76.63	51.3221	197.64	233.677	168.969	1037.53	1039.55	768.536
115.681	77.1429	78.2391	256.475	188.405	238.52	892.73	987.625	870.337
109.963	85.9757	31.5432	230.477	184.426	253.947	1013.66	1207.39	453.49
101.242	85.119	65.6504	154.735	283.821	298.417	773.902	832.237	971.004
112.641	110.774	32.1188	148.643	186.702	347.043	1391.61	1066.8	824
137.898	98.814	86.1481	153.895	186.566	288.018	1165.51	1787.51	898.999
118.543	125.201	81.051	145.518	228.465	260.773	2262.89	2310.91	1435.39
129.448	94.2661	29.4029	181.172	232.124	321.216	1416.66	1201.57	1033.9
109.436	102.584	90.4078	191.241	291.379	294.394	1823.93	1405.59	691.253
127.753	94.026	82.0198	192.474	154.663	325.781	829.642	2405.49	429.015
111.733	72.5124	95.1062	198.551	109.391	298.929	1683.1	641.148	773.678
114.364	78.4538	84.197	195.061	124.222	281.547	412.191	1708.1	1056.46
99.9871	71.994	77.0285	179.531	261.826	240.666	1690.45	1582.72	646.026
105.248	127.976	95.2804	193.741	222.335	262.201	918.03	2194.61	573.278
79.8511	66.9501	81.0032	162.854	251.997	213.957	1750	1886.13	565.888
144.159	87.8162	88.9776	171.053	214.594	305.538	1415.66	3322.76	542.795
149.852	80.3773	68.104	177.38	412.94	240.278	1293.87	2969.47	739.493
122.292	68.221	61.7636	172.636	331.828	267.092	2028.97	1379.91	670.09
137.82	82.9859	72.5187	168.021	409.76	265.903	2045.63	802.456	1033.17
94.3345	76.5128	61.9468	179.229	350.858	214.608	1066.88	1413.66	608.24
136.262	70.9592	80.8722	178.617	371.948	231.553	1161.53	591.721	780.575
126.255	79.1048	68.4165	179.007	415.378	234.24	2331.01	1293.66	902.068
145.344	72.1667	67.0848	240.349	195.278	324.472	1052.35	1758.71	885.546
144.539	100.05	56.598	270.91	835.232	231.129	1368.96	1358.94	622.848
156.473	87.3055	69.8755	170.354	975.963	237.983	1217.6	730.137	548.119
94.0156	70.2187	79.9971	135.628	858.018	251.529	1616.02	801.458	811.961
103.569	69.8105	54.2456	174.953	777.602	285.276	1699.97	1744.71	589.133
166.264	65.3607	50.4338	168.98	761.226	230.71	959.25	783.581	286.329
181.628	71.3516	59.9908	213.461	239.178	213.168	1074.44	1033.64	608.455
167.237	65.8737	61.9355	162.8	649.533	251.128	1696.03	516.806	651.272
185.659	67.2398	60.1527	154.796	760.158	233.185	2159.18	682.234	1270.43
161.709	69.5054	57.1678	133.025	524.936	244.354	1260.51	1614.18	737.927
199.917	67.5772	55.9091	153.215	207.702	299.935	1429.18	1209.66	714.107
434.582	79.4785	58.5843	132.555	234.93	254.143	1810.68	2531.7	598.766
546.91	70.3435	57.4336	165.366	198.843	209.283	2741.46	1630.29	678.554
460.526	56.5763	52.0457	194.619	162.085	282.629	1392.89	1311.02	725.304
419.491	67.7675	52.0151	189.692	212.009	320.911	2621.99	1641.09	482.498
416.089	59.2314	49.0561	188.671	246.126	423.198	1861.42	2483.04	1083.77
424.389	60.119	39.0053	220.2	232.692	278.552	2387.22	2645.92	782.352
509.878	60.2755	48.9669	198.69	212.789	306.335	2337.78	1063.33	858.808
298.603	64.4464	48.6239	250.688	256.852	319.776	2281.19	639.794	816.704
353.874	54.2229	30.0134	212.165	224.188	258.819	2913.26	914.802	682.997
459.701	63.7622	48.5477	251.161	307.909	266.299	2386.49	624.075	623.166
611.826	61.4232	60.0385	181.479	350.74	248.78	1906.4	612.958	702.505
330.436	43.7097	59.276	182.829	234.434	249.074	1330.24	1103.78	716.119
280.964	53.9792	60.2034	186.721	251.782	216.563	1302	1102.97	811.298
451.414	54.9922	55.0671	175.843	410.825	274.396	1646.7	1704.31	794.623
330.224	63.6776	68.9594	182.824	268.027	273.465	1744.23	1506.46	949.701
408.058	57.8651	76.9852	174.47	277.553	321.456	1639.2	1621.11	990.84
310.713	57.5993	68.8247	178.34	187.732	318.224	1307.78	2325.74	481.447
385.615	65.2792	69.069	180.761	245.457	329.251	976.644	1437.65	762.074
402.712	58.1059	85.8841	144.477	213.881	308.631	1516.71	962.183	781.312
306.029	91.523	60.1148	156.233	208.339	337.518	1472.67	1038.42	1159.96
527.998	89.401	62.3419	158.437	204.384	263.264	2388.28	786.208	896.092
335.016	116.837	61.1415	162.023	203.411	294.592	1412.51	1338.88	760.204
426.25	101.18	66.6134	184.823	210.411	246.095	1052.01	713.673	921.936
422.128	87.6397	57.3146	161.516	207.616	186.779	2328.75	1233.75	671.739
371.556	81.4503	56.9448	171.749	193.974	206.982	1297.83	585.471	1105.6
459.693	77.4203	58.7493	154.535	208.947	107.507	1126.07	2376.73	755.875
459.712	68.5769	56.4701	128.475	186.093	248.541	2838.8	2442.07	824.203
373.015	97.2733	58.9772	162.939	240.791	257.217	2451.53	1677.57	934.783
425.526	94.6352	63.4211	149.795	240.429	365.238	1889.94	1918.68	504.125
406.238	76.7317	61.5304	150.675		308.825	1342.68	1416.53	288.777
491.206	66.9526	63.2286	179.545		329.159	1695.48	1800.12	476.047
603.75	70.3538	66.8837	181.737		348.888	2691.05	1579.6	282.863
478.656	87.4757	67.2174	149.556		413.469	2764.85	2952.19	439.647
279.252	89.5517	66.1188	74.3958		200.37	3365.22	2402.67	549.065
421.647	70.3932	56.8731	92.5163		268.925	3051.59	2821.06	333.003
203.896	79.4293	63.8605	181.378		199.64	3528.87	1411.48	605.281
298.807	80.7904	39.4143	216.697		262.698	1776.65	2725.88	486.298
304.174	78.4359	48.7141	198.133		326.829	872.397	1440.02	391.289
312.492	85.2635	52.4504	181.05		365.505	1312.09	489.168	729.481
338.612	84.207	60.9742	176.808		319.294	1218.57	1559.65	866.98
351.169	88.0149	52.4373	202.827		334.146	1146.5	1774.9	304.216
307.027	90.005	61.6652	87.1358		338.303	1462.62	1583.94	345.852
363.346	64.9944	72.8727	83.7349		843.979	1159.24	695.726	1131.1
485.768	74.8583	63.3105	104.059		696.055	1847.45	537.613	1453.07
331.633	88.6684	68.5713	167.902		644.551	1252.59	621.63	682.651
343.554	77.657	60.8672	104.179		647.489	1433.69	733.475	758.024
376.894	77.1852	68.5699	162.521		677.078	1061.8	705.821	702.487
339.448	86.6198	67.0473	182.158		604.264	1454.81	643.363	594.455
381.285	83.4964	61.1718	128.872		514.484	1393.77	1171.51	1444.92
370.192	82.696	59.6468	179.934		513.915	1768.57	945.38	779.447
302.921	97.9691	61.9457	172.159		449.228	2229.75	1062.83	599.434
288.324	77.3023	69.8798	152.413			1753.55	1151.89	561.188
345.004	77.3038	72.8273	145.527			1506.23	780.064	881.079
220.171	84.3133	64.3278	252.761			2061.82	545.031	1234.26
258.711	77.6197	63.1295	224.455			1584.35	534.57	779.356
243.5	74.8171	68.6622	193.436			2445.84	2229.86	698.024
262.566	82.7027	73.7268	179.681			1382.27	1530.19	1046.19
355.647	102.514	70.3648	276.033			1096.59	1540.66	1483.69
361.911	96.7024	75.793	229.077			2111.25	1723.08	1270.21
371.226	72.7796	69.8724	244.257			1775.63	1033.82	721.294
312.602	98.2049	76.3321	224.288			1995.91	1549.55	392.161
379.071	71.0115	72.7858	97.9557			1191.28	1281.82	715.277
358.561	78.566	72.5642	209.116			1180.32	1619.62	629.04
200.96	86.3367	77.5255	218.305			1468.57	2095.34	702.743
252.675	87.1648	98.208	217.439			1761.62	1192.19	706.026
227.16	93.9546	72.3825	207.77			1097.24	678.225	950.175
305.333	71.6168	117.122	205.406			1341.58	1250.69	949.787
280.167	83.1114	97.479	175.53			1001.78	562.168	1123.54
230.269	67.8877	73.7918	216.216			1057.53	670.916	770.94
342.92	75.5333	79.5709	217.235			2076.15	1049.96	811.6
344.661	101.444	71.5432	197.611			2388.55	987.259	696.767
326.406	97.0897	66.9254	196.36			2095.76	817.002	562.537
280.111	61.5103	69.6807	222.359			927.86	1039.99	455.652
205.599	70.2446	65.8716	175.132			1951.76	858.909	527.399
328.344	68.0279	82.1324	173.382			1810.74	843.123	779.715
301.414	52.7418	71.4743	93.8067			1033.21	1128.46	1057.15
299.269	52.6508	76.6779	171.832			1149.5	874.391	758.905
278.943	55.9254	84.8564	132.287			1113.06	802.951	1180.59
311.008	65.3339	79.9488	210.32			1211.32	572.279	1162.25
240.016	66.3505	67.7085	183.928			1601.47	762.808	919.943
258.884	60.7767	92.8904	175.329			1162.16	1199.8	1531.33
334.149	64.9183	57.9691	149.983			1239.75	848.046	991.009
268.9	66.3513	67.3837	184.998			2265.77	1091.53	755.606
209.551	60.2706	52.1665	354.547			1288.87	750.758	850.321
224.637	83.283	66.354	245.52			1593.5	1224.74	748.461
242.435	54.6679	78	389.077			2581.24	949.814	1026.92
216.138	59.84	84.413	457.743			2053.7	940.753	847.773
235.11	71.2359	62.7414	598.769			1208.69	1671.21	1043.39
208.79	65.7524	72.4177	610.92			1826.4	1925.98	821.076
210.665	83.9907	82.2717	495.031			1042.15	1159.33	902.922
174.438	57.5142	77.5879	561.483			1552.89	1602.91	775.22
219.298	58.9023	71.9553	488.16			1710.85	521.893	866.135
194.127	73.1444	88.2483	477.477			1519.35	1141.43	690.625
169.95	61.1448	80.0393	594.301			1797.92	787.665	1045.48
216.573	72.3641	93.5963	545.682			908.143	634.47	695.902
202.615	67.6768	75.8314	527.537			1077.46	883.792	812.382
231.266	66.6734	96.4963	502.733			1449.82	1180.56	757.471
202.858	69.8145	78.5152	550.189			2406.29	1392.1	1459.1
213.268	63.4562	99.2339	449.912			2202.11	831.615	871.219
194.954	68.5867	117.273	753.64			1808.2	999.121	667.26
240.45	65.8	111.923	371.207			2120.1	660.726	1263.14
158.842	61.4068	151.212	369.616			1525.84	1024.6	787.738
149.676	59.8936	126.487	386.97			1859.24	1099.32	535.631
207.646	58.5048	136.593	437.551			1589.84	962.981	465.536
242.568	59.7339	139.239	390.517			1625	963.716	524.524
210.944	65.6926	29.8514	377.61			1871.22	565.19	1021.68
189.305	64.1442	65.1081	305.655			2608.49	420.521	956.054
73	72.8917	56.6452	349			1763.46	684.193	989.727
91.4342	68.2012	66.3839	377.337			2024.79	1607.73	640.971
81.0412	53.676	61.7496	313.155			888.832	645.661	937.034
79.3	63.1164	64.2087	318.36			958.662	815.133	650.478
81.2448	49.9131	65.9261	241.455			1040.05	1033.07	446.635
72.9648	44.8857	60.484	314.822			875.787	788.513	723.724
86.0103	47.4515	54.4119	321.072			1793.33	867.963	797.502
92.8519	55.7105	58.0944	421.977			717.025	917.089	851.428
96.7549	61.0402	57.1959	455.612			767.962	823.608	1166.4
95.027	57.7154	76.873	424.764			1932.56	1205.52	809.44
91.3268	55.3221	65.5153	490.021			1330.81	1301.96	483.904
83.1585	58.2888	56.053	410.16			775.153	851.892	622.736
114.849	54.6805	52.0145	483.671			1072.85	874.445	413.266
126.761	43.4259	50.1835	328.457			1746.22	1160.12	824.856
114.412	60.9195	51.9192	469.686			1929.19	2173.86	457.499
111.498	52.1372	47.5128	306.382			1161.07	1369.32	857.268
84.1481	58.0712	53.6275	352.5			1242.93	567.954	1139.78
99.8677	57.8316	52.6889	307.62			928.936	910.766	368.755
107.808	59.6575	54.5182	362.154			1275.04	1123.91	869.758
92.3372	56.0995	58.4526	282.863			821.412	1058.31	544.979
83.5636	59.966	49.5	282.263			985.516	1280.25	767.207
92.2	59.2853	48.7649	254.567			1587.7	1338.87	996.215
87.4727	56.4781	55.241	265.063			1454.91	1289.18	782.775
65.9153	55.8705	57.7067	230.452			1053.01	1238.85	616.94
104.437	52.6157	46.7514	270.916			1057.45	762.576	372.722
119.616	50.9778	50.933	234.226			1284	903.314	308.592
80.5484	55.2196	55.7987	211.421			1179.59	743.094	445.386
62.8824	54.5043	56.7604	158.023			1468.32	986.07	769.164
69.7316	47.1596	54.0087	183.342			1918.82	1312.55	704.131
53.322	52.8026	50.2993	271.504			883.372	1048.86	1117.76
107.283	56.0813	56.7417	288.212			3138.78	987.569	691.236
218.206	56.7243	55.9541	250.982			1908.94	885.86	1326.7
214.297	59.6538	60.2141	216.729			3099.91	935.063	709.058
224.654	55.0862	57.1155	196.333			3742.91	1055.89	799.967
204.056	57.3798	65.2496	207.358			3767.75	749.245	746.019
206.968	57.599	61.3134	175.25			2954.55	1398.02	797.078
193.845	58.8449	64.0668	157.813			3724.6	1297.33	821.1
207.93	95.6631	28.719	225.444			3380.26	1325.63	602.354
193.851	91.8749	26.7326	243.196			2921.83	1273.53	470.864
200.699	89.0359	21.0938	229.707			1064.42	1011.84	630.482
201.336	81.3551	49.0369	188.686			1525.87	1622.39	738.302
175.76	100.863	56.6608	160.435			1837.41	1431.84	548.757
197.358	58.5497	56.4314	195.695			903.265	1445.64	556.903
196.097	53.087	55.3739	159.821			833.763	1065.18	464.774
152.808	50.0079	56.1425	176.493			728.943	1032.1	958.354
176.575	44.4787	47.6219	217.606			1238.46	980.088	846.105
235.592	50.0295	48.0259	118.943			1041.51	1098.2	1027.34
220.861	61.7568	46.1077	137.907			845.276	1224.91	1005.72
222.079	62.9393	50.1499	153.086			813.775	1135.03	1161.47
234.098	65.1424	51.676	180.645			943.671	774.976	271.973
127.625	58.1125	44.6582	168.423			982.876	1782.43	409.03
122.562	59.276	39.9384	184.928			986.638	1455.13	254.994
88.7262	63.6511	49.15	158.331			1225.2	2037.63	311.121
49.3832	58.187	51.212	201.745			926.303	699.656	392.974
72.5978	75.1667	50.8319	202.434			1000.54	616.588	559.406
64.3028	90.0368	37.5905	158.884			1050.74	1318.43	1062.45
56.84	68.223	39.7158	148.223			1435.8	1308.45	1077.32
72.9071	78.8626	44.8517	168.625			956.641	1091.32	1060.8
76.7183	67.5554	43.9207	116.584			870.58	842.999	621.208
71.2442	64.0054	38.083	286.27			1542.28	1133.96	735.359
95.3028	89.5943	39.6746	305.438			961.367	959.614	699.878
83.4964	62.6813	42.5445	214.408			864.716	868.949	931.13
98.7704	67.4224	39.7601	263.117			673.54	1519.51	985.326
72.7473	59.7615	42.1084	195.161			1062.13	1487.08	966.126
97.4207	68.3664	40.519	197.191			705.093	1011.21	374.024
112.043	59.1307	43.3101	202.763			940.956	1354.9	861.531
69.9202	70.7256	50.4592	256.123			3099.55	479.608	694.041
68.5814	91.3015	32.3961	253.195			2169.01	915.719	664.548
63.7444	66.7866	48.7651	214.84			1587.68	1498.79	700.39
69.2788	60.4879	54.0474	263.592			1677.49	1154.89	956.673
70.7406	67.0452	45.2454	309.224			1804.82	1291.92	795.124
75	77.2011	50.3675	118			2366.68	1105.25	1463.49
65.4854	70.6605	47.1966	319.675			2898.43	1172.5	1139.37
82.2186	84.3925	48.0237	237.459			1451.66	3085.21	943.3
79.4698	66.5573	45.9854	238.299			972.236	1786.96	1017.46
78.875	70.0971	54.7224	201.95			1082.84	1368.42	1156.64
68.7344	77.7889	45.8271	207.186			2584.08	2105.13	742.561
71.9245	68.4168	52.7764	222.839			1036.72	1813.58	1080.11
76.4433	67.278	49.9007	215.082			1060.11	1840.53	890.456
82.4171	73.4574	51.3868	223.889			690.533	1979.72	708.919
85.918	70.2907	51.7083	228.523			901.771	2151.24	641.632
68.6068	65.2767	53.5439	215.514			2264.14	2651.54	528.666
75.375	50.5495	56.6159				1183.5	1465.56	673.383
80.812	49.9463	52.6024				958.155	1685.41	707.953
87.3284	47.207	56.6825				1178.29	1136.75	559.693
89.875	50.4391	51.1282				843.358	959.304	556.845
88.3834	48.4718	50.8665				785.513	2085.04	613.825
80.6342	59.7775	53.5617				1658.64	1588.63	880.306
87.8623	52.7268	21.6667				1037.73	811	895.629
87.7482	55.993	34.3409				967.966	533.339	671.814
84.5676	56.0518	20.6522				1120.17	1092.48	806.616
96.1231	52.7822	47.9454				1167.84	653.673	1277.58
99.2866	48.7945	43.4626				1472.36	1062.32	695.732
79.9548	55.9206	51.4441				1064.32	1019.96	920.046
64.1571	57.5	31.0341				1488.1	941.951	1178.96
73.4453	55.8728	28.406				1331.84	1128.14	1277.55
117.5	53.1078	34.2097				1157.44	1067.09	1312.91
88.2351	53.9399	67.3836				2097.4	1303.34	1173.66
71.2235	55.059	16.2097				1350.53	665.925	1070.82
79.3778	57.1482	37.2381				1268.18	1068.58	950.381
69.1707	55.9094	58.8997				998.213	1894.77	835.116
82.518	55.3387	65.9632				1221.3	1682.66	1431.61
82.3007	62.6396	55.2878				1062.96	1624.73	1229.06
104.732	57.7481	48.228				930.704	1517.04	834.927
114.537	58.505	61.5561				1281.42	1595.63	875.02
87.2708	57.222	33.9689				1179.25	1757.11	728.448
82.9477	56.0953	55.2785				2830.89	2521.05	472.078
94.3506	55.398	58.4038				1617.2	1581.02	716.28
87.0795	54.3985	58.6248				1203.28	1486.19	879.895
104.941	53.871	67.825				1330.87	938.408	1143.86
98.7352	57.0209	59.8274				1061.28	944.956	971.298
83.8927	55.5307	47.8099				966.224	1629.33	1173.08
107.093	55.5316	75.505				1531.02	920.931	865.037
86.0964	54.5661	73.4605				1109.41	584.483	999.316
87.4309	71.6868	70.2159				1118.93	945.239	1235.65
91.2479	71.2033	72.5556				2716.7	796.361	1047.96
95.9559	63.4476	61.6425				1675.11	1492.35	830.897
101.629	55.1239	61.796				1622.11	619.059	1566.26
108.771	71.8765	74.5587				1493.15	552.908	808.343
89.5078	69.0985	43.4872				1554.46	721.83	1133.2
92.8758	64.2392	44.8763				1490.42	1260.78	797.561
104.483	62.5189	60.4475				1641.38	1113.74	716.706
77.9469	58.5776	58.1321				933.914	945.903	1049.61
92.1648	59.1359	64.6504				1259.75	988.502	708.424
80.2067	52.3618	30.7634				711.747	887.315	623.48
107.748	58.7904	60.5923				1200.95	973.238	806.715
83.8667	59.2768	53.0301				1710.99	1307.14	616.055
83.1685	56.519	47.9368				1240.32	463.034	550.906
163.656	59.8041	46.0602				1221.14	736.012	670.815
81.8247	66.9158	47.1978				1130.71	2029.47	599.994
75.1899	83.2339	46.3979				1336.26	1105.67	548.335
89.9058	61.7841	50.2902				1042.99	1146.58	455.917
84.811	61.6554	48.5397				1092.21	1873.69	1020.7
147.137	74.6314	41.8122				1589.17	1356.45	1133.9
130.5	69.2383	53.8881				1300.84	1727.46	1054
140.04	72.6677	49.0568				1511.36	552.005	1168.84
132.651	68.6732	52.026				1337.59	925.985	1049.15
154.019	68.6791	57.3				1096.67	944.71	788.753
76.5054	62.733	50.8468				1025.84	920.492	887.398
73.2368	76.823	55.0268				1277.03	1014.47	1244.94
207.966	56.6734	63.4556				1590.5	1218.07	796.723
120.61	72.6955	56.2602				3465.13	839.816	854.753
80.0814	69.7639	59.0596				833.365	875.993	941.681
75.692	75.6391	35.2164				1065.09	782.262	699.461
106.083	67.9767	23.0299				968.612	805.282	914.656
97.1155	62.155	26.3096				833.591	539.602	945.391
87.6238	65.6066	59.87				1169.79	573.189	1027.86
110.624	63.5219	56.0075				1288.65	841.762	832.531
113.216	74.7341	55.1673				799.386	835.5	445.104
66.3309	83.4304	45.9171				1095.25	700.79	607.2
57.0898	71.449	44.5717				1977.85	1391.2	606.305
63.3722	67.9631	45.7568				931.293	776.308	324.336
78.5093	67.73	46.9957				1250.93	927.634	702.21
68.6172	79.5994	75.7676				1220.4	1004.29	986.521
72.3926	72.5308	68.6791				850.341	1089.57	1193.07
74.3147	68.5858	65.2052				939.075	1049.16	701.269
66.8077	71.6962	57.7299				976.009	853.644	1000.44
74.3088	76.9492	61.2624				1349.65	888.03	972.665
81.8636	66.6317	46.57				1982.67	392.703	517.216
77.1288	74.1392	57.8116				1175.47	534.859	399.541
101.165	59.0322	53.1119				1073.75	967.811	633.896
85.8558	78.1236	52.2549				1633.91	1337.6	720.291
72.3341	69.599	57.3072				837.167	956.469	750.51
65.0619	56.8598	72.6394				1275.33	908.635	887.638
60.0989	77.7783	61.7022				695.486	559.307	745.666
70.2472	67.8092	125.095				1398.22	529.163	653.255
107.101	72.9151	99.2061				613.723	792.784	1309.3
73.3517	79.5643	78.929				1899.26	613.012	1230.92
69.371	73.8098	81.009				885.883	770.577	1552.54
68.9503	72.8595	72.1861				852.256	861.367	1173.86
74.8541	78.9417	69.2809				829.823	901.808	981.263
62.9728	78.005	93.6111				699.13	986.745	1035.17
64.063	73.4179	86.0297				1479.2	867.676	858.61
75.4384	97.0928	68.3147				874.268	634.628	713.393
71.4793	70.0298	60.2043				942.69	485.346	907.989
62.924	82.7006	51.9981				766.755	1480.13	864.711
72.668	89.8643	48.7903				991.655	1339.12	1556.57
78.5164	91.1952	60.6957				837.159	1343.13	1447.23
73.9657	67.4633	58.456				1115.66	553.604	1878.03
63.1581	54.0045	67.6672				1024.92	1110.72	966.882
66.7201	54.2186	68.2438				1035.28	1174.98	915.142
65.3794	71.4398	71.9585				1228.7	707.717	933.216
124.173	67.453	75.0084				1101.52	706.158	564.837
112.928	65.8826	77.0664				1031.25	683.547	653.429
98.2484	83.4074	70.5422				1408.05	815.131	570.92
73.575	60.8003	70.4595				1445.32	748.573	435.53
120.088	61.6218	65.8062				1249.27	498.311	506.19
131.565	73.7642	73.9545				570.119	833.3	640.134
107.048	77.0463	74.5355				586.357	1528.69	543.45
114.285	75.9724	64.3295				523.817	899.92	459.849
99.0337	72.5878	73.3184				645.661	1279.64	530.741
100.786	66.9263	60.4978				1421.57	742.257	879.807
88.4583	64.6724	68.7921				2237.13	1193.17	650.017
94.2566	277.034	69.6842				1214.77	618.073	605.882
104.118	211.514	57.3119				674.715	1169.74	1114.58
83.3697	204.168	71.9512				722.475	1251.67	859.98
100.24	202.529	60.838				699.335	1390.78	895.758
92.8086	207.484	73.1987				1051.38	1238.81	852.276
83.9963	219.151	82.6942				946.612	1225.95	525.679
91.2852	190.399	78.1265				1335.99	1013.23	1682.66
104.655	164.517	70.7774				2195.41	1265.84	523.252
112.604	206.889	75.8389				2809.3	1099.08	1239.03
109.615	170.529	71.6069				1694.33	680.434	685.481
84.6386	214.218	62.4131				1607.89	722.237	724.336
76.6507	221.529	64.3616				1738.76	754.399	818.105
75.7415	165.724	66.3286				929.821	1511.33	656.491
87.5982	226.033	62.4007				1040.9	1361.45	1231.04
89.6562	157.72	49.5484				1020.13	2020.37	826.049
103.953	321.468	69.9954				1191.47	609.752	1078.96
85.245	267.794	70.0895				948.472	687.941	1164.62
95.2433	285.925	60.6994				846.021	871.137	968.997
76.428	264.648	65.3215				2346.42	910.584	862.35
88.808	163.835	66.8026				883	1143.7	868.489
78.9511	190.303	62.2456				1569.35	1085.33	921.014
69.594	244.431	74.4045				1827.46	1111.52	856.713
79.7679	188.048	70.0714				682.802	1242.42	719.031
96.6684	266.242	92.4108				1426.59	1756.67	998.944
104.24	238.401	69.9253				1095.93	916.081	1407.35
87.6132	182.793	77.2905				895.942	712.577	822.655
116.113	187.118	68.6873				1619.23	1100	379.596
71.3231	230.091	69.6091				1202.29	1230.62	784.994
133.003	182.044	66.2532				1313.62	1321.61	499.753
154.325	217.851	75.0056				1200.54	1089.46	740.159
158.365	159.083	68.3083				953.076	1197.44	878.41
97.6734	192.477	73.6991				1421.81	1109.28	1414.86
109.679	198.332	70.308				1121.57	611.933	669.585
81.0609	199.242	59.585				1023.81	742.781	1497.66
189.682	227.132	58.442				2060.22	1349.18	1113.77
149.086	223.243	67.3418				1487.55	1186.98	730.578
133.823	168.02	70.3434				1217.92	832.298	819.739
130.067	240.149	72.4213				961.728	679.292	855.059
123.703	228.215	62.5				1274.79	1000.93	692.104
138.336	172.335	50.0271				1323.13	1144.7	704.656
158.639	231.483	58.1923				1092.4	1145.87	1163.97
134.55	167.793	63.3991				1741.26	1367.89	626.339
126.487	173.106	57.297				1818.49	1036.92	425.834
131.811	200.94	59.444				1528.12	1239.99	1397.36
149.877	210.084	64.4986				565.944	1073.75	1016.22
121.134	256.174	60.6869				529.591	1409.06	966.723
141.413	224.111	57.4394				666.515	1234.03	836.598
133.84	163.889	72.3165				414.124	1126.72	1212.32
120.007	156.679	62.9811				994.155	1043.6	983.787
102.976	161.37	57.0376				1053.34	1274.27	850.975
109.542	141.026	63.4659				803.852	1195.75	859.79
137.348	148.85	63.697				852.361	689.405	768.58
133.442	152.646	64.5773				1325.55	1155.67	776.54
102.607	194.785	63.5783				685.794	409.333	752.387
126.769	163.093	57.9049				648.381	1100.46	699.285
102.014	206.694	71.7991				674.126	402.667	303.118
114.11	164.783	65.954				650.355	488.429	491.316
125.814	179.375	66.8711				749.123	588.589	539.626
148.804	159.139	66.3213				1612.43	1072.16	1079.27
124.054	214.422	58.1109				1314.53	516.583	1270.34
140.508	154.417	58.3796				1316	567.344	718.98
138.533	146.838	65.6313				620.651	1206.13	617.806
121.078	212.592	61.9594				1077.83	1359.91	1041.92
130.704	225.94	63.0729				1117.98	795.276	937.199
143.821	166.804	72.1941				1225.57	2511.71	562.878
156.876	237.317	54.7682				781.71	887.463	1135.25
123.028	171.14	59.0742				641.337	2585.08	1296.91
125.689	180.333	49.0662				749.774	1415.14	588.272
171.399	145.359	64.5994				547.811	1600.48	552.715
142.303	204.235	57.0977				939.684	1038.29	802.799
128	201.182	56.8747				881.368	1013.51	850.43
114.718	204.267	56.9277				683.244	881.14	925.851
109.701	209.699	54.6194				634.795	1515.14	1140.66
179.252	183.649	58.628				541.625	2951.66	753.81
109.154	235.874	52.7127				661.776	1535.35	857.97
143.366	167.301	57.2841				1120	1745.39	790.534
102.504	246.912	64.9632				666.237	1045.12	649.731
132.358	169.072	57.4112				675.043	1362.81	725.222
133.993	239.87	64.7127				640.993	1143.24	1178.44
152.097	199.372	72.4749				519.485	1551.67	932.384
122.048	230.965	65.1636				732.098	1945.33	594.048
135.063	216.394	63.4071				889.804	1147.62	1088.99
190.538	214.295	67.3839				622.863	847.399	1041.06
149.761	185.367	67.4918				921.116	1713.32	1034.08
178.168	245.354	67.675				791.832	1334.42	1222.06
98.6018	175.375	75.2126				1005.34	2529.62	1143.68
86.9844	183.615	63.8245				711.549	1164.47	1334.28
110.815	250.562	67.3795				799.307	1606.66	985.316
109.55	168.038	75.3095				1941.05	568.416	817.946
133.768	168.42	67.6228				1106.34	1083.13	912.854
115.228	217.178	66.0812				1164.74	2035.9	1023.59
105.661	208.685	68.054				933.416	946.156	547.62
101.261	223.212	66.1185				891.162	617.67	1081.64
191.953	208.268	64.8588				788.86	1043.12	846.186
100.414	191.319	79.9592				909.062	1340.77	535.006
106.214	228.395	63.0512				880.065	1610.62	549.649
109.699	181.204	56.3887				689.935	1571.79	1115.41
99.6625	252.518	59.1396				655.63	1087.59	753.965
158.911	175.301	73.0656				993.316	1220.26	956.93
107.032	195.264	59.667				2292.18	1238.45	702.663
106.002	210.545	55.551				1746.33	880.332	694.46
115.087	222.103	70.0144				792.268	779.336	862.324
90.4457	234.415	67.1131				918.709	841.403	691.144
92.7794	229.264	67.4346				1540.06	1198.47	1215.6
161.585	226.019	73.353				1213.86	919.936	1299.2
106.366	211.776	69.9635				1125.06	1559.36	1674.84
186.128	178.207	63.6552				1523.13	1329.37	540.398
107.406	158.717	57.0427				2602.9	443.614	525.844
172.951	249.762	61.6456				1616.8	872.191	522.402
159.916	162.893	80.1751				1350.29	991.171	535.807
112.66	156.598	85.0765				1090.47	676.544	1190.18
130.406	213.068	80.2863				659.747	2406.95	900.622
138.83	249.302	59.9939				630.492	1108.01	752.807
129.565	252.514	70.082				560.627	1604.06	954.65
143.612	191.545	70.6129				639.191	1214.49	673.759
161.591	264.497	66.4673				943.172	1660.77	1102.06
155.348	223.628	69.7705				611.365	1111.79	689.195
158.253	239.125	74.9821				1504.1	1061.44	773.919
145.518	238.282	61.7759				841.449	657.975	520.843
136.489	230.893	81.2426				1211.89	630.522	821.658
127.014	173.343	78.5				1971.91	487.438	756.186
125.048	248.098	65.1412				1651.68	921.698	671.215
127.786	216.813	63.0435				502.539	500.168	655.149
127.016	252.035	51.3056				1093.86	920.572	948.49
227.83	237.285	57.8514				1356.94	907.986	781.122
155.534	192.379	59.2613				846.835	830.384	1019.07
153.266	196.195	65.9919				940.519	815.155	1333.76
172.302	197.979	61.4716				804.104	727.745	908.25
171.047	246.974	62.8798				1204.06	849.244	1129.66
201.953	258.631	56.2615				883.058	594.333	1054.37
196.725	271.644	69.6456				904.508	668.099	662.944
132.486	259.67	76.7052				678.65	686.699	726.675
195.723	186.768	68.0175				833.171	909.338	1191.23
171.608	192.511	70.4138				897.901	619.42	1459.44
160.057	253.337	72.7824				1262.79	579.724	803.766
208.349	203.185	74.2439				597.877	673.304	1056.72
204.692	223.049	70.5559				1073.74	609.269	706.094
163.156	189.754	62.23				777.362	768.312	1827.81
175.248	177.466	58.8175				1104.67	989.694	1245.92
209.539	253.854	61.8458				545.866	1009.66	550.107
186.253	251.752	82.1974				965.697	708.514	1518.53
158.413	231.634	67.486				828.614	1427.88	979.163
138.278	189.619	76.4841				870.499	900.3	1449.76
152.763	224.526	66.0941				2135.17	721.689	1100.16
179.078	240.196	54.1429				918.864	490.995	1414.7
184.714	191.045	71.416				820.229	959.337	892.966
167.649	194.892	54.5912				790.691	379.088	632.569
148.135	253.23	43.6852				1525.03	370.831	772.214
	172.496	49.8568				1094.98	668.864	743.852
	155.375	64.2812				834.022	521.88	1153.02
	253.38	46.7093				797.53	661.227	704.054
	201.839	35.1726				781.8	752.053	984.651
	247.412	71.8715				1793.64	925.414	847.561
	267.145	74.6487				1169.9	664.353	819.288
	212.336	36.6325				770.087	684.066	743.802
	200.469	77.0595				1049.71	627.739	596.546
	208.684	66.1166				911.128	591.199	553.378
	195.888	77.6938				1844.44	938.825	722.625
	206.088	71.7989				2430.73	1035.73	890.005
	232.75	78.0727				1619.67	1250.71	1895.5
	126.485	58.5084				999.024	617.011	1538.03
	139.539	61.9372				1208	1308.6	1354.79
	153.449	62.8849				1845.52	714.106	2604.9
	189.594	57.4923				1423.4	948.667	2171.42
	165.244	62.2063				824.21	718.987	834.888
	173.285	58.2842				822.069	924.639	726.874
	171.953	65.5582				993.409	1106.7	1411.83
	215.17	59.5323				1339.35	974.939	1871.34
	199.656	71.1869				1059.06	660.75	1193.66
	203.61	65.2288				1064.57	1127.71	1591.6
	221.201	63.9244				869.508	1121.51	1448.39
	225.564	64.2712				1164.59	874.25	327.341
	199.691	75.0996				1115.16	967.956	1116.2
	247.798	72.9928				2008.37	1464.28	2403.11
	160.364	62.0476				898.341	713.626	1376.71
	169.804	76.0274				878.629	1348.43	1600.74
	259.158	78.1024				1445.69	1775.25	1460.74
	309.966	67.4553				845.255	2461.68	2174.77
	220.98	66.625				699.532	915.924	1436.64
	183.761	67.8391				1095.23	1202.41	879.28
	201.463	61.2633				662.282	1053.48	1278.92
	211.557	74.5056				666.984	1108.47	1611.9
	274.068	53.3762				1370.35	1210.65	1438.91
	255.694	62.1705				553.045	1186.32	1423.03
	184.962	73.3178				785.673	1311.86	2762.99
	176.609	73.3376				877.042	942.909	1730.97
	216.623	65.1603				782.222	582.176	872.229
	175.255	79.8265				804.543	680.993	841.006
	170.231	51.0464				1007.21	960.654	888.915
	226.556	59.8191				999.575	1040.79	1426.34
	186.444	52.7197				760.317	704.51	1288.53
	186.913	60.6709				509.71	851.75	1296.21
	212.812	64.4674				454.773	855.735	1081.32
	204.283	62.0159				1363.65	750.755	373.223
	209.5	62.2831				486.145	723.896	458.44
	196.427	58.425				830.823	1299.31	858.762
	190.082	62.6016				1071.31	1267.64	982.069
	211.759	67.8832				673.733	817.533	1181.72
	160.685	68.7509				779.019	2264.2	1034.88
	237.294	64.6829				761.851	1119.86	908.881
	181.699	64.047				659.039	1360.42	994.984
	162.35	62.1215				764.28	721.84	1045.6
	260.732	67.3884				1316.5	1105.66	1344.92
	203.7	70.3712				761.441	956.903	1026.71
	180.511	61.8432				1055.35	731.929	716.594
	206.414	60.5519				923.692	831.319	561.292
	256.637	59.1248				1695.16	1204.03	518.067
	241.343	73.0708				833.37	666.538	654.013
	144.077	97.6402				929.379	745.864	819.885
	151.955	112.208				699.072	757.066	1619.96
	157.599	117.929				682.554	931.519	638.909
	145.006	129.558				1764.63	1121.23	833.843
	180.335	115.18				1320.06	722.68	599.415
	151.17	130.28				944.116	672.253	625.359
	131.621	87.0426				1268.35	805.236	565.049
	140.422	87.3926				817.59	882.827	507.433
	137.413	105.236				1479.44	691.4	521.797
	123.141	113.17				730.093	773.643	944.04
	144.194	103.6				583.851	1283.64	573.041
	141.806	138.384				622.679	804.82	470.528
	198.459	119.298				649.64	1080.69	1663.2
	184.931	120.918				1395.68	1409	629.481
	193.432	111.987				1750.46	1488.74	361.854
	166.016	111.087				1691.29	1122.41	602.424
	195.812	103.918				855.829	1605.08	490.136
	211.087	106.154				1192.85	1459.65	602.016
	192.333	104.616				1210.35	1220.96	738.351
	182.915	112.801				915.937	1880.7	269.493
	244.985	116.675				1454.62	1026.79	662.936
	210.78	126.989				904.606	1712.11	456.442
	180.087	116.574				1569.79	1316.14	900.643
	172.04	126.994				725.544	494.754	457.356
	168.873	125.417				727.335	1736.4	841.192
	226.047	124.15				1166.63	701.385	691.625
	205.552	116.959				989.005	757.055	505.104
	174.735	119.652				960.667	1178.55	668.913
	161.392	117.967				693.797	442.516	519.051
	212.006	135.404				737.902	1038.44	494.254
	192.996	117.767				1776.98	920.71	467.797
	216.77	111.859				783.525	759.152	521.522
	160.927	107.62				1674.75	1016.48	672.154
	191.412	123.808				703.54	666.082	592.07
	206.781	136.727				1513.74	932.054	600.271
	154.307	99.8922				714.285	1037.31	635.724
	185.486	121.02				1217.81	1147.16	827.655
	220.744	92.2183				1178.2	814.99	448.825
	206.395	107.955				1120.59	989.444	1146.97
	200.958	109.309				894.136	596.163	983.62
	212.009	113.628				1065.07	489.209	785.658
	184.672	113.402				1756.46	1000.31	904.001
	165.826	109.632				2556.42	264.119	1064.77
	154.359	106.776				2061.13	1484.74	772.925
	187.015	120.038				2145.5	1313.12	1211.91
	175.754	81.4669				1149.37	1158.14	674.15
	172.453	77.4427				2320.17	613.241	572.551
	196.406	85.8311				1595.19	1165.17	765.034
	179.034	72.5396				802.005	826.768	1070.89
	169.413	79.0291				2400.55	1093.53	1044.49
	174.386	96.306				2698.56	1653.83	1182.78
	181.237	94.8475				951.178	1148.77	1231.12
	158.941	94.6561				979.86	1121.24	1278.3
	197.64	99.3684				1415.45	1035.37	581.008
	319.852	105.15				1309.66	849.615	534.347
	191.733	98.968				1624.91	1508.18	1083.21
	217.022	73.1176				1606.67	1472.92	1146.62
	217.646	74.8797				1734.83	1829.56	1229.75
	237.995	89.8126				2406.73	1387.97	660.164
	198.391	79.3484				3075.8	1272.12	1143.12
	226.419	96.9812				1291.38	1641.29	1026.43
	213.66	81.3023				901.43	1259.82	936.539
	148.222	95.0226				1570.12	850.7	734.651
	140.919	87.1857				1424.63	818.654	516.381
	186.179	118.022				1632.53	1246.69	596.019
	190.557	93.0686				654.726	874.447	750.046
	213.494	72.0964				1843.93	753.387	456.861
	120.054	78.0606				1042.65	471.19	448.708
	129.742	71.9379				1152.19	798.909	462.284
	156.548	60.6082				812.281	505.231	658.043
	114.476	63.7399				832.717	702.424	480.067
	153.546	59.9945				1007.73	732.598	515.155
	149.445	70.9404				960.601	423.308	549.854
	154.397	227.194				1388.72	653.364	451.355
	135.694	252.761				1565.21	675.072	652.69
	138.602	73.8821				695.486	912.532	281.081
	151.52	81.1587				770.161	907.901	1115.34
	144.683	187.023				1262.83	741.904	769.17
	146.731	188.772				842.875	911.265	1070.01
	152.648	258.721				739.559	520.432	638.535
	159.824	193.193				890.277	1254.49	918.209
	167.917	238.31				1333.27	850.25	875.162
	161.164	226.418				580.723	615.638	493.856
	163.372	212.996				1013.88	641.389	671.881
	136.262	178.306				707.185	934.175	566.917
	137.243	142.816				622.568	406.602	525.961
	158.394	229.614				751.469	349.037	386.798
	122.038	224.765				1315.21	358.095	538.927
	145.953	208.227				865.633	305.534	787.129
	129.655	201.159				662.1	321.123	1279.33
	130.379	79.2432				534.209	558.798	788.886
	162.982	103.647				541.149	355.953	1200.26
	141.058	107.943				758.126	932.107	676.437
	157.989	195.538				1101.56	752.261	527.13
	183.328	174.755				1604.88	462.892	1067.18
	194.669	220.307				1406.35	565.029	538.988
	199.834	227.247				1482.37	958.855	936.736
	193.77	218.171				842.274	610.827	765.51
	204.825	189.566				559.752	781.34	483.94
	186.691	149.874				695.734	649.302	306.859
	206.083	213.735				1419.42	925.901	575.102
	185.208	204.825				1844.63	607.05	975.598
	180.059	275.276				932.846	1043.78	246.459
	166.195	208.715				1224.33	1557	377.657
	109.776	201.39				1161.22	1167.82	602.758
	171.666	223.927				621.319	1163.87	526.908
	156.641	224.914				839.391	1082.37	586.673
	158.304	227.439				736.081	742.103	645.634
	122.926	231.407				1711.75	616.961	475.445
	111.998	243.331				988.225	756.79	808.979
	138.223	232.474				969.646	528.889	765.157
	156.171	222.408				840.989	545.744	618.452
	163.094	248.587				1838.41	619.148	274.998
	145.992	246.527				1170.05	343.656	394.777
	124.85	203.867				718.176	542.461	335.634
	132.993	160.569				618.003	729.704	848.311
	169.581	117.987				1437.86	693.813	658.508
	107.3	147.804				1368.28	352.223	644.545
	161.429	139.429				822.296	649.339	300.525
	137.394	65.3338				830.358	521.121	385.18
	143.798	61.3199				1158.33	488.854	477.601
	153.067	65.7393				1039.55	505.25	528.025
	181.147	70.7717				1689.37	413.187	574.93
	149.977	63.5315				789.896	524.534	380.661
	137.957	65.598				878.848	915.189	612.334
	183.062	71.4244				1680.2	711.462	625.758
	148.053	78.9758				1332	720.242	436.55
	168.901	144.534				2187.5	519.808	759.339
	152.98					763.175	1083.24	1117.8
	153.313					883.65	412.548	906.638
	145.953					3081.52	1076.71	992.924
	154.944					1454.31	820.935	1058.38
	169.812					1747.92	1557.2	1116.68
	157.257					2007.07	650.707	1214.88
	182.96					1213.11	1042.43	590.778
	195.316					1444.55	989.852	552.485
	172.165					1368.78	637.405	560.033
	102.903					1874.1	1223.36	665.543
	138.545					1073.9	396.895	740.448
	120.505					730.115	1016.85	596.753
	124.379					795.433	710.029	502.849
	118.771					765.453	541.089	1153.37
	147.555					2131.52	658.891	850.802
	116.567					982.291	1074.21	709.901
	117.121					1077.43	1041.85	696.024
	132.111					1244.41	699.446	1683.51
	151.081					1482.33	1078.11	879.214
	134.977					998.798	1371.15	1034.05
	146.993					1010.66	724.994	696.217
	159.127					956.647	614.027	589.54
	178.991					1040.73	643.31	829.069
	148.893					1005.03	671.902	1126.51
	170.77					1075.31	577.466	1271.6
	117.896					1467	564.192	695.295
	105.868					2160.74	617.224	801.033
	119.336					1881.62	746.361	700.253
	122.799					1064.39	866.206	919.342
	126.742					1671.74	1077.12	706.339
	104.458					1075.69	1043.07	585.929
	137.026					1364.13	1005.82	1178.49
	102.936					1027.81	1072.12	1269.15
	91.8479					1130.57	964.235	1188.35
	106.909					2312.07	630.043	1559.89
	123.491					1576.26	1024.41	1206.32
	115.677					3057.42	1007.59	1810.81
	131.073					970.145	858.315	1039
	138.14					1545.4	838.59	1060.29
	123.678					1002.59	1255.32	1335.56
	83.2549					978.738	853.702	959.779
	91.2177					1180.04	812.95	868.427
	97.1387					2861.91	1065.14	907.243
	89.6578					796.042	1304.68	1241.6
	112.597					2515.72	517.69	1383.08
	116.882					1706.99	720.417	990.449
	97.1314					1934.73	460.445	785.017
	123.069					913.153	918.87	1219.94
	101.646					943.345	773.357	758.47
	100.032					624.167	732.939	1217.88
	118.175					740.181	1083.02	1220.36
	140.571					1297.57	861.131	827.726
	120.532					734.133	858.888	769.116
	100.993					603.984	1329.37	990.086
	113.46					998.921	505.588	908.683
	123.62					888.057	796.845	1187.92
	117.955					700.318	1008.78	1050.59
	104.109					702.716	700.327	1385.41
	101.712					1314.27	592.942	1378.18
	123.766					765.794	1064.51	1980.31
	106.266					685.048	900.958	975.864
	64.7761					899.569	1026.5	402.925
	355.876					1352.79	322.68	934.938
	438.989					618.435	411.817	647.326
	314.31					1764.92	420.275	734.724
	216.669					1371.58	470.767	1449.85
	376.142					941.233	693.628	623.254
	246.628					868.116	776.178	1108.64
	320.871					1037.45	1084.84	1087.8
	451.983					1254.32	801.571	664.937
	345.101					1016.11	1187.84	871.474
	345.495					799.607	721.461	1241.38
	325.281					1429.04	703.459	1004.04
	270.651					1701.97	663.457	758.217
	465.819					1832.53	416.74	1293.73
	415.167					844.429	615.232	728.833
	443.383					1164.25	900.653	882.24
	521.81					916.991	663.846	1791.91
	423.345					759.338	869.821	672.45
	303.433					1233.86	1217.36	1205.89
	262.443					880.958	1161.5	1213.6
	293.468					595.711	1006.8	1338.47
	144.839					1400.39	1171.03	1148.59
	295.105					948.263	945.274	852.475
	262.52					1216.25	1012.33	880.907
	310.631					797.556	1075.89	864.919
	331.029					979.013	1124.7	494.648
	466.653					906.188	756.978	901.651
	335.283					867.354	2000.64	621.415
	324.93					833.757	973.889	956.228
	463.57					1039.91	647.4	1224.05
	495.844					834.184	959.034	1250.32
	479.739					948.306	939.312	658.757
	413.232					850.348	739.583	909.993
	456.298					1242.91	1070.24	724.228
	411.934					1057.42	758.929	980.275
	287.299					971.988	703.573	861.555
	453.963					1632.17	574.285	791.253
	454.184					1286.6	920.869	613.027
	63.778					1085.43	481.1	719.204
	63.8425					1069.99	642.616	891.546
	74.0323					1211.14	419.838	757.165
	77.6427					1377.1	1485.84	698.929
	70.3052					1662.46	599.786	947.93
	61.5791					1640.44	826.695	926.232
	51.9282					1762.22	1760.74	958.59
	62.219					1881.2	758.845	691.544
	72.0574					1759.95	695.691	541.834
	56.5568					894.308	1340.99	935.815
	51.9098					1438.41	605.532	901.86
	58.0172					2221.87	960.981	709.57
	55.453					1138.04	1073.31	554.06
	51.0451					1533.09	1656.13	537.306
	58.3591					1293.05	1726.08	561.152
	54.0208					1936.13	1312.42	773.077
	52.0638					702.013	1133	448.451
	48.4701					1139.18	1234.36	788.979
	49.9452					1154.5	909.722	565.751
	94.0441					1358.76	1276.15	686.914
	63.6896					1317.63	1417.59	444.98
	65.2173					844.577	1116.09	936.264
	52.16					1372.02	840.821	953.363
	55.4487					861.628	766.271	322.664
	58.5833					1321.29	442.483	710.539
	52.1172					682.773	1216.29	1062.56
	77.2579					655.998	455.649	881.964
	66.9424					1481.58	497.266	708.61
	64.8268					1000.39	428.187	368.573
	68.2959					947.823	1522.5	383.151
	61.5662					1627.09	1181.35	606.872
	73.8214					1408.16	1459.37	477.188
	62.1874					1407.48	1086.29	793.065
	65.8255					1336.72	937.239	809.945
	64.2146					1443.94	1014.7	561.64
	53.6267					1256.42	1003.73	457.92
	48.6379					2323.18	840.826	1585.02
	48.9427					1638.7	969.068	507.334
	50.8086					1462.88	1593.37	633.88
	58.027					1975.71	709.405	804.406
	47.6301					1046.16	1129.8	674.819
	49.6049					1107.35	969.336	720.341
	51.3547					1473.4	701.736	869.962
	64.8924					1417.92	1195.05	648.923
	64.5996					1098.52	1214.34	439.065
	68.4158					1474.1	817.442	491.819
	58.971					881.595	1417.55	591.096
	73.2216					1300.61	1118.38	409.455
	72.6438					1471.06	1233.18	709.919
	67.9623					893.36	890.713	611.456
	76.7224					1762.2	470.016	663.975
	60.6728					2211.21	873.133	632.494
	57.4742					896.943	513.75	352.45
	82.5737					868.226	405.703	534.057
	66.1899					763.317	376.104	1008.46
	64.8783					1722.41	513.604	680.371
	64.1091					449.114	538.422	366.224
	54.2811					534.18	1166.21	697.96
	55.5918					664.972	938.832	613.323
	62.9172					1226.43	955.481	725.518
	49.4758					617.627	1361.4	506.455
	49.3347					813.409	1785.4	592.061
	66.598					1262.67	1756.42	573.707
	66.8843					1378.25	650.63	939.769
	63.3062					893.1	839.617	686.333
	55.8338					826.556	839.203	347.11
	70.0129					957.708	1202.08	688.662
	76.5222					861.368	1224.59	741.799
	59.8714					680.541	968.42	954.853
	70.3277					581.893	791.169	696.184
	79.0707					731.89	1198.57	762.944
	77.4041					691.484	1213.8	770.515
	81.2472					700.857	1026.15	962.563
	74.1186					1135.18	1222.57	784.019
	77.3527					925.482	1105.07	601.716
	80.0823					757.179	1168.88	939.035
	83.8315					1032.07	1185.49	774.793
	62.6728					565.6	1355.81	589.541
	76.4425					687.468	1128.15	578.196
	87.2776					884.071	1320.19	583.719
	100.372					699.596	1077.33	839.528
	69.2881					713.165	1015.13	587.24
	74.6449					416.6	1356.15	910.385
	87.5671					552.218	489.961	1024.39
	78.4191					579.258	672.125	946.12
	95.3505					1459.87	638.488	667.406
	88.0596					1728.16	647.268	723.327
	87.3482					466.795	871.826	783.113
	107.365					725.376	756.553	603.676
	103.13					719.192	887.301	560.381
	81.9792					758.201	914.21	532.931
	143.242					665.947	693.318	663.877
	147.64					527.132	544.051	1076.17
	142.151					1274.79	572.372	622.947
	136.09					1247.19	380.969	672.269
	160.307					708.152	1043.03	826.317
	171.914					1158.7	1077.19	732.136
	177.377					902.864	915.672	490.773
	83.2256					561.948	800.487	792.3
	80.3886					1012.42	1863.84	750.532
	72.8486					663.822	1080.9	661.695
	56.1344					1266.09	739.857	866.249
	68.3398					1462.46	1339.87	749.168
	96.5596					935.328	1050.89	808.576
	75.5958					880.73	438.864	981.739
	71.8317					531.617	697.968	835.44
	82.8114					1011.8	968.543	812.224
	82.9878					1103.63	1007.47	884.598
	69.187					1526.37	1046.63	680.847
	92.0465					1305.03	1581.58	621.769
	88.4475					658.013	1846.9	608.509
	85.4259					793.506	1327.85	664.591
	78.4093					1810.55	677.228	904.314
	85.8119					1136.19	555.292	1175.56
	62.9535					769.284	776.033	816.289
	69.8099					1268.27	943.248	898.901
	69.3237					1218.15	810.213	869.303
	73.3877					1003.46	679.473	785.2
	63.7361					1190.31	985.6	1135.93
	71.3531					1071.93	787.975	691.713
	58.1733					1086.43	987.247	700.504
	79.2079					464.282	592.649	938.293
	67.0777					878.466	588.128	530.993
	57.556					964.397	394.941	735.486
	54.3708					1497.1	247.315	862.697
	67.1864					946.396	446.178	807.475
	72.7439					760.768	834.47	721.227
	68.849					876.886	838.173	501.994
	59.5603					1491.38	629.653	506.049
	61.4927					1497.33	876.533	783.919
	64.7234					581.807	359.354	929.374
	65.7049					666.381	572.051	753.949
	69.0197					971.951	959.142	1157.23
	53.4672					743.035	878.129	927.525
	54.7462					713.62	564.396	849.93
	66.087					775.657	444.982	840.85
	52.3507					889.838	745.395	953.301
	30.3888					953.765	1455.28	738.064
	55.181					621.163	703.649	579.438
	55.4295					589.062	819.31	652.225
	54.8255					859.376	851.215	491.409
	60.2069					956.84	672.027	848.339
	62.1947					1096.01	958.537	831.326
	46.3398					637.926	382.348	1057.15
	44.2065					904.975	904.125	909.013
	52.6674					834.529	868.868	977.18
	54.2405					951.945	1505.66	1005.77
	53.1795					793.28	1089.3	735.159
	86.2591					869.065	1332.48	824.593
	93.7869					1202.78	1411.03	681.409
	107.964					897.189	1818.89	707.063
	54.2093					812.476	982.312	585.543
	69.2849					1359.1	1138.28	623.854
	62.2447					806.426	770.421	769.003
	44.835					614.009	779.039	682.331
	69.9653					857.851	902.286	840.882
	55.3842					656.433	990.429	636.853
	76.2994					945.938	595.195	779.893
	63.3096					1000.87	922.485	814.951
	53.1732					940.139	780.716	550.665
	59.55					784.847	929.279	622.403
	65.0711					768.493	720.915	587.802
	65.4481					914.849	519.417	674.288
	80.8894					1316.73	519.721	688.309
	85.7371					1819.76	967.026	731.577
	70.3123					947.551	682.451	684.073
	68.4073					1009.04	1067.62	444.337
	53.2444					911.625	753.696	526.298
	53.3293					850.067	493.755	820.07
	108.053					774.417	1079.71	639.658
	125.321					658.863	514.326	974.786
	69.3673					989.112	854.732	675.336
	79.6036					1331.83	887.277	871.1
	89.0759					835.509	637.888	810.933
	87.8148					1031.52	1203.57	785.112
	115.433					1207.05	651.046	899.019
	58.2925					856.313	872.14	999.752
	67.2421					867.744	951.045	809.336
	75.2549					834.551	942.284	618.286
	104.688					752.527	717.737	835.329
	102.432					1067.21	1024.85	707.036
	89.4479					1446.87	1036.18	808.019
	87.0645					1410.81	714.376	971.875
	76.6396					1791.92	622.412	707.237
	71.0123					1316.8	1294.31	922.893
	64.1221					1150.28	302.797	647.66
	64.5172					1247.09	1199.11	1040.42
	63.5039					1309.31	1104.12	667.17
	58.1747					1236.85	1166.57	704.585
	58.2873					1240.73	1336.17	778.415
	63.6521					1087.19	1156.08	709.295
	71.139					527.824	1477.3	863.714
	62.744					1050.99	1384.7	770.285
	121.764					1239.65	532.84	780.957
	104.864					1007.43	1074.14	957.119
	105.26					1274.51	784.554	752.398
	125.209					1749.23	1415.61	755.826
	67.7338					1543.17	609.676	998.306
	75.379					2178.27	880.923	797.16
	87.9977					849.258	595.68	725.353
	87.0199					637.703	526.799	921.289
	86.6231					1353.43	1517.52	658.63
	92.5319					1343	1496.7	780.685
	85.3597					600.755	1399.88	901.917
	89.2043					1224.03	1462.96	961.066
	131.31					1222.38	1548.36	813.07
	78.9147					1650.86	1144.43	957.489
	145.365					1360.09	1472.14	795.77
	92.1717					1023.04	578.044	1123.71
	132.011					1713.42	657.796	748.301
	87.2817					1243.26	579.239	1154.73
	75.1365					485.138	897.73	1407.16
	84.7678					1190.85	1184.96	781.487
	51.657					1399.86	783.977	938.228
	55.9286					1474.6	821.427	492.76
	154.723					1249.04	1048.33	802.743
	226.415					1244.12	1296.06	864.766
	149.611					1523.65	1576.22	841.831
	202.154					1290.59	578.553	829.766
	141.546					1017.84	1360.38	977.768
	124.837					1330.13	1682.27	814.059
	136.096					2715.81	1135.12	785.573
	85.0014					1224.46	1143.47	861.558
	99.7631					1115.09	1432.57	883.859
	76.3451					618.213	1213.2	647.774
	92.7849					884.913	1040.58	660.056
	95.1508					1262.08	1075.43	555.848
	59.9489					829.91	1167.59	1029.91
	87.5986					1097.41	1200.75	819.175
	103.875					775.657	742.301	806.998
	73.7484					1839.21	1001.16	1197.31
	101.37					822.606	1187.71	779.409
	81.7988					1058.38	865.279	342.275
	53.867					1355.65	1119.16	628.844
	49.362					1139.18	1071.16	936.167
	46.8495					586.136	869.631	875.031
	57.9304					682.703	1116.09	821.234
	53.6884					1394.84	668.704	1095.32
	48.6639					1368.92	1087.61	759.538
	46.3417					1220.33	716.908	710.604
	179.29					409.443	820.721	1063.82
	138.929					766.033	1598.58	857.1
	179.62					884.664	1175.69	557.754
	140.92					718.27	1266.46	883.786
	115.792					2281.88	594.983	1203.12
	163.762					1437.01	788.667	692.178
	64.5334					1282.09	532.707	1190.65
	69.2033					1580.52	722.133	700.141
	70.4014					1632.53	1235.7	718.211
	67.016					669.102	910.288	1475.05
	78.9955					417.35	579.238	2012.86
	73.935					1280.46	1123.3	826.246
	67.9171					1473.18	1101.07	760.318
	61.1935					923.237	787.794	310.499
	61.2294					1082.95	980.515	303.47
	59.9113					732.296	1252.74	1154.45
	68.2444					1215.88	1849.11	1084.31
	82.0547					1371.26	1271.15	1265.91
	76.6416					478.203	1430.08	1432.87
	73.1503					284.915	1032.82	858.238
	75.9266					154.142	1065.15	1113.12
	85.7693					531.232	903.072	689.967
	55.5722					886.693	991.037	520.955
	59.1692					908.494	542.92	1910.98
	70.2129					793.737	561.176	1013.63
	62.5879					566.551	723.875	1123.05
	59.3172					477.716	1836.56	2037.33
	62.726					1200.75	892.335	991.907
	68.7067					806.938	969.471	1491.12
	76.2506					698.932	1121.18	1102.74
	70.548					1135.54	925.034	1511.77
	64.9746					637.724	1272.28	988.358
	50.7078					1045.6	1023.47	1054.18
	44.492					961.101	1266.58	1203.45
	49.5417					726.904	1541.45	1343.76
	65.6567					973.797	797.457	1306.24
	59.1221					998.61	1251.75	1396.15
	58.534					1076.73	1130.54	1357.47
	59.4279					1077.82	832.121	1109.02
	57.6651					992.172	1318.11	1179.97
	53.3822					964.576	472.99	1625.92
	59.7699					1237.43	887.716	2243.96
	57.009					799.417	950.988	1463.25
	62.3766					961.191	1288.08	1421.3
	62.5103					607.805	1231.07	1191.6
	61.6558					813.301	529.396	1637.71
	58.5771					847.728	855.534	914.936
	58.9241					603.269	638.88	1756.93
	55.5428					692.408	850.914	1328.27
	57.2035					1166.67	1129.95	829.931
	53.2222					1037.6	971.822	934.958
	56.2055					879.343	505.741	1849.91
	52.7335					652.644	363.065	1101.81
	64.5736					640.896	159.927	1515.12
	45.495					834.166	1294.14	1089.62
	50.4954					584.235	1156.1	1493.77
	54.3481					523.15	1575.66	1524.17
	55.3052					1115.64	613.175	1404.31
	61.38					741.729	553.055	1450.99
	51.778					919.167	1360.13	1012.98
	52.0352					1194.52	657.825	1448.78
	44.1489					617.607	839.761	1539.81
	40.6342					682.773	775.013	1331.01
	53.5282					765.649	387.66	1053.55
	42.5921					1507.02	566.483	1003.14
	52.3563					1446.63	578.582	1617.56
	40.9666					757.722	437.36	1563.53
	53.6616					888.379	978.854	1647.82
	50.5385					1001.03	761.904	850.681
	49.8862					699.634	449.259	921.833
	54.3096					932.437	419.304	1239.94
	56.7056					1243.44	728.281	1003.31
	58.3485					1483.14	1469.62	1112.91
	42.8886					1532.02	526.341	1334.84
	54.0675					1499.2	1150.83	856.967
	55.7094					1635.29	1143.8	1946.7
	61.6379					1837.62	545.996	1154.51
	65.3144					1449.29	855.885	1373.74
	57.9642					1032.08	1047.96	1144.63
	62					1584.21	457.392	1639.41
	60.3636					1709.97	1185.8	890.414
	62.7426					799.584	956.611	1095.25
	93.5638					865.607	1378.31	1670.39
	83.1651					877.201	1223.59	1137.77
	75.2545					736.068	646.509	1001.34
	73.4167					1082.32	769.194	1041.37
	71.3802					1193.17	1028.59	820.33
	78.5697					1066.02	650.887	1139.49
	81.3039					1079.98	1630.06	1712.13
	69.4982					1239.8	1971.91	1176.26
	75.0555					400.472	2113.8	1236.27
	77.4923					772.615	1714.55	2072.47
	68.6061					624.247	2462.13	1298.94
	90.0124					1322.45	1285.3	1624.95
	79.8668					796	971.819	1685.24
	67.7287					1019.91	645.752	1188.9
	89.1503					782.759	1093.48	1217.83
	67.9698					1096.9	830.576	1053.69
	95.1814					1099.63	613.455	878.574
	83.6995					1215.63	1241.8	969.506
	84.4003					993.156	1005.61	1851.45
	65.6604					642.134	1086.59	1056.51
	71.3705					709.136	1667.83	1200.42
	78.97					760.778	858.278	1170.45
	89.799					600.743	1214.36	1393.94
	83.6143					581.145	805.7	2621.94
	66.3434					813.38	866.866	2564.82
	46.5438					1272.28	1018.62	2322.1
	48.464					893.721	1488.63	1673.56
	50.7806					735.44	978.578	1637.3
	50.3109					1235.87	482.29	3403.56
	58.6134					784.258	552.858	3201.4
	79.2363					995.615	698.804	3107.47
	57.6437					1071.06	1243.17	3101.52
	44.5162					1138.72	567.7	2615.65
	47.3965					961.798	687.267	2375.88
	42.2558					1352.66	349.397	2799.59
	55.6911					595.808	1019.64	1777.5
	53.5256					884.671	391.454	2564.34
	54.5956					773.727	1020.4	1422.91
	47.6178					1127.99	757.493	2020.69
	49.2726					843.883	735.448	3494.7
	46.5478					943.098	747.463	3187.37
	60.9413					889.361	1465.97	3203.74
	53.5444					818.69	1164.04	3535.02
	68.2987					972.335	554.057	762.158
	55.6617					815.586	674.837	1808.09
	57.814					859.97	619.241	1443.15
	51.146					779.797	912.72	1301.06
	59.1954					722.563	1310.57	902.161
	61.9744					964.214	826.437	1203.47
	62.2652					778.181	2181.46	679.11
	58.178					730.177	1183.05	1107.99
	53.9848					689.373	979.351	1302.39
	63.0212					765.98	1115.65	1008.03
	58.3382					556.926	764.069	1914.51
	56.9945					789.148	1017.97	742.345
	61.0368					1136.4	1177.78	767.508
	76.9746					538.244	1049.73	1177.43
	66.754					262.933	1253.54	827.857
	56.5434					258.854	1716.77	706.329
	63.8693					262.529	2269.75	778.892
	59.3939					641.65	1341.26	807.757
	58.8719					331.501	3354.73	1079.7
	70.9936					746.037	1486.34	1110.17
	68.3493					600.366	1075.57	770.61
	90.4422					929.655	1385.4	807.147
	77.8678					786.894	1115.13	855.886
	78.686					517.745	1888.32	2196.42
	60					870.428	1395.35	756.563
	95.1221					1047.16	1188.62	2732.61
	91.3291					1407.8	727.095	2238.79
	83.3811					1696.62	1144.43	1936.41
	108.756					642.077	911.629	3159.1
	84.8157					757.235	1172.13	3094.79
	101.501					525.494	1152.98	3396.64
	60.7488					899.661	752.867	3071.85
	60.6443					613.998	1454.02	2782.61
	58.333					696.621	825.179	2110.93
	61.9084					1948.3	1397	1991.93
	52.3444					962.22	1181.14	3054.7
	60.5448					1355.91	1131.33	3162.91
	63.0289					1169.53	1362.62	2267.35
	72.19					1680.64	1428.11	3376.92
	45.6196					1096.58	1385.39	3313.67
	60.4536					1410.09	1230.18	2887.36
	76.6324					467.531	1202.48	1696.6
	53.236					489.133	886.098	3446.47
	50.1686					704.567	853.175	3258.34
	60.7906					760.991	1016.79	3572.16
	52.63					643.282	1023.18	3668.36
	56.5338					407.559	1513.43	3099.88
	65.1872					835	1239.24	1668.82
	58.4853					1102.34	1091.58	2621.39
	66.4051					422.516	500.152	3412.82
	65.3205					683.185	826.779
	63.2295					751.681	2440.93
	64.8548					1049.1	1364.27
	69.8226					355.456	850.216
	58.3558					655.627	1177.28
	62.88					460.8	1567.59
	70.7497					624.124	2241.93
	69.9894					918.742	1393.28
	168.677					472.824	1442.88
	150.209					734.297	1549.92
	142.693					558.38	751.785
	134.691					459.016	635.536
	133.394					1021.09	1835.55
	110.172					764.356	2486.15
	109.954					685.294	2729.06
	113.915					1529.93	2071.02
	99.8643					976.407	1704.52
	101.049					596.852	1957.68
	72.3343					779.525	1066.98
	57.2629					719.073	1748.82
	60.3965					773.612	1799.36
	59.6389					599.59	2023.66
	55.9807					1019.52	1937.86
	57.8339					1839.96	2418.43
	56.7195					1012.44	253.824
	53.7385					1436.88	1773.58
	62.5785					934.484	1946.95
	60.3684					763.885	2139.86
	68.9167					854.961	2419.6
	69.9589					1016.68	1584.84
	123.13					1038.83	1531.42
	106.405					719.447	1203.2
	56.714					945.32	1501.43
	53.4638					689.768	1017.93
	59.5327					1234.96	453.008
	54.7875					795.646	890.76
	57.8314					1149.89	1339.62
	68.8398					951.185	1238.94
	72.1166					1164.86	2068.56
	59.1464					1226.32	1706.31
	57.0658					928.734	426.959
	52.9481					756.444	587.267
	57.4789					502.032	1259.43
	62.233					535.687	906.783
	57.2997					1226.21	978.451
	52.2148					593.961	710.184
	58.6509					563.408	695.875
	60.2676					785.05	658.905
	59.8302					708.214	516.31
	60.4464					846.537	950.326
	55.5					528.667	491.225
	54.382					922.376	822.891
	54.9372					715.765	343.554
	54.6697					1424.45	478.044
	57.109					880.705	643.744
	54.9266					1459.85	748.324
	55.5497					765.488	607.46
	68.0314					949.333	812.975
	57.9895					1008.38	288.275
	57.378					1057.75	613.333
	69.5942					749.445	319.514
	56.6134					1573.01	197.319
	64.6208					735.854	743.721
	62.496					1163.64	717.732
	59.371					791.333	612.363
	70.7606					674.201	802.884
	60.3775					687.56	469.732
	62.7105					811.562	620.304
	65.4846					674.18	437.575
	66.9846					827.326	645.258
	68.974					844.517	355.79
	53.1116					1051.55	675.537
	73.7023					1015.04	887.098
	72.0868					747.628	889.653
	69.3838					732.887	584.868
	87.2045					1265.44	766.657
	58.3025					802.639	912.112
	51.5912					988.708	826.246
	57.6506					497.034	665.978
	35.5869					997.296	1340.24
	74.8694					1343.31	1664.03
	80.8592					467.881	1483.64
	58.2005					1034.79	1489.46
	50.6158					453.045	667.119
	63.0478					626.704	1288.06
	45.2457					637.815	1098.69
	47.7482					819.695	1283.4
	54.8478					721.114	1142.54
	46.662					942.211	1252.38
	47.1338					942.893	1088.93
	46.9548					559.745	850.841
	61.8932					1286.52	546.695
	65.8455					899.63	833.72
	50.462					905.661	904.833
	89.5591					761.891	788.706
	84.9377					891.084	2698.45
	80.8178					813.989	1119.31
	93.8812					676.51	784.032
	88.9484					1111.39	513.589
	72.1133					1093.29	1252.03
	76.5088					1054.53	709.825
	80.6742					943.438	1779.87
	81.7648					1079.16	834.738
	101.808					598.217	1527.5
	83.2693					701.163	1334.86
	77.11					663.46	1492.22
	84.61					530.905	692.029
	79.8196					394.321	643.087
	85.7745					980.551	728.245
	69.1388					426.273	835.36
	89.0992					476.51	639.696
	84.7815					811.865	707.575
	73.2526					799.525	743.892
	70.5479					695.57	823.875
	90.485					589.258	1490.18
	94.0946					435.853	1449.83
	73.5747					527.27	1188.45
	64.1361					779.746	1036.12
	67.6291					703.202	1618.05
	83.6421					814.043	1277.68
	80.5917					594.761	625.57
	57.9871					611.374	1181.61
	91.1257					1095.5	1438.59
	82.7941					821.763	2110.55
	77.0692					524.584	970.944
	114.27					1027.87	2014.47
	44.3235					809.542	1601.89
	69.3782					900.315	2638.98
	43.1293					639.581	1164.23
	25.9697					463.414	1988.12
	45.6018					695.031	1909.45
	53.7905					1224.34	2569.61
	196.064					1022.51	1271.35
	347.604					621.327	1037.02
	212.592					885.892	1732.51
	193.38					2811.58	2040.5
	172.523					3279.43	1640.45
	232.962					2508.57	2351.91
	159.194					2393.12	1710.24
	177.171					3585.46	1147.68
	149.948					3251.42	1059.29
	125.93					2538.19	788.608
	174.119					4088.6	1127.34
	156.267					2164.07	905.834
	141.331					3309.04	877.407
	159.301					2658.8	2537.03
	163.459					3980.76	2164.24
	141.051					2802.52	1988.63
	127.77					3429.93	1309.36
	139.475					3785.31	1197.58
	146.479					3039.49	1390.78
	131.064					3307.45	1378.25
	87.7904					2683.75	1367.6
	223.119					2349.32	1305.8
	215.967					2734.94	2056.04
	251.198					2427.14	1200.71
	121.335					2751.12	1064.66
	40.7569					2626.45	1781
	98.7386					2274.99	1414.96
	145.818					2641.48	2349.73
	130.284					3105.31	1679.88
	143.068					2493.08	2028.25
	185.029					3057.66	2665.89
	112.713					1082.11	2920.85
	56.1063					1840.95	2813.94
	69.502					2210.15	2499.1
	55.9243					3890.66	2275.24
	54.7071					3600.92	2519.19
	56.6917					3950.06	2151.01
	59.1102					3686.27	2027.54
	56.2609					2774.25	2332.62
	68.8983					3101.17	2553.99
	76.4923					798.401	3026.49
	82.9054					847.957	1962.67
	75.4448					776.738	3018.48
	75.1145					3076.01	2353.45
	74.8714					3285.57	2468.58
	76.8267					3533.13	2238.14
	66.6165					1362.52	1143.88
	60.6611					997.351	999.05
	71.6078					1558.83	1286.43
	60.7238					1219.48	1397.38
	57.1317					1262.54	1594.57
						2413.3	1414.14
						1895.14	1665.81
						1405.43	937.019
						2017.98	526.56
						1197.46	2132.98
						981.284	1392.04
						1042.6	958.457
						1017.75	2328.53
						3050.46	996.437
						1120.98	1264.47
						2746.03	1389.57
						3587.66	937.276
						3281.5	1415.37
						3650.82	1709.73
						3040.48	1825.3
						3652.86	1357.59
						3622.9	1330.36
						3606.02	1188.91
						2882.96	1107.64
						3354.97	905.025
						3286.85	990.984
						2041.46	2057.27
						2468.09	515.208
						3187.01	1470.69
						3158	811.084
						3633.92	709.67
						3738.86	756.319
						2512.32	940.476
						2577.86	745.884
						2274.74	738.103
						1853.71	825.776
						1901.52	639.884
						2087.33	979.513
						4008.21	1497.52
						1887.65	1357.85
						1846.66	1040.87
						4004.15	1274.97
						1835.03	935.637
						3524.93	1335.73
						3290.49	1078.39
						3860.3	647.656
						3246.58	846.467
						2492.23	1513.34
						2637.18	688.765
						2719.69	1105.43
						2234.75	664.86
						3715.64	1004.02
						3346.56	2428.35
						2714.77	713.168
						1297.14	1600.99
						1915.65	1520.55
						1587.73	1215.09
						1979.48	1667.67
						1275.49	1443.13
						3151.06	1127.43
						1368.7	1334.09
						2542.71	1324.73
						2871.43	2166.33
						2079.44	884.836
						2153.01	1645.5
						1374.6	1215.34
						1365.22	1737.38
						3419.24	923.575
						1400.7	899.628
						1992.31	1511.77
						2851.86	1213.73
						3134.69	757.911
						1509.57	671.718
						3237.14	1170.31
						1963.77	1678.38
						1538.33	343.861
						1638.25	363.254
						1999.79	951.182
						1767.73	743.793
						2034.2	805.786
						1655.05	805.579
						1992.22	1140.78
						2083.34	887.114
						3380.68	1277.02
						1550.63	1659.35
						1725.28	2045.38
						1650.03	553.915
						2030.98	400.717
						1541.14	1222.38
						1448	700.26
						3448.76	780.14
						3334.91	733.913
						3457.44	870.452
						2416.96	1523.67
						717.26	1771.37
						915.351	1081.62
						1249.54	1431.71
						883.149	1495.09
						1794.09	1935.58
						1026.27	1999.63
							1352.04
							1236.74
							1113.82
							1055.43
							1382.97
							1358.1
							1306.65
							1749.39
							1145.37
							1929.86
							1162.98
							1498.76
							2257.11
							758.046
							1283.47
							1217.27
							949.165
							1080.61
							1047.11
							788.598
							1535.97
							1100.27
							1239.44
							1754.55
							1143.3
							1583.09
							1141.41
							1492.94
							1043.37
							1322.47
							1435.53
							1108.51
							1411.5
							1170.23
							1596.87
							2137.79
							1749.77
							1130.31
							1429.73
							1672.28
							1738.41
							313.219
							2164.61
							2285.47
							2768.03
							2892.64
							2594.19
							3193.97
							1373.05
							2173.21
							2510.38
							3169.7
							2844.77
							2699.46
							1915.44
							2905.21
							3061.36
							1278.1
							1671.06
							1008.51
							1788.71
							820.197
							652.942
							908.349
							740.68
							1005.98
							1490.76
							676.263
							1482.7
							827.115
							1509.54
							1557.06
							844.812
							1483.51
							1853.87
							2062.82
							1169.77
[truncated: 115 more rows]
