# Supplementary material for: Large-scale cell-type-specific imaging of protein synthesis in a vertebrate brain
Source: eLife. 2020 Feb 24;9:e50564. doi: 10.7554/eLife.50564 (PMC7048392; doi:10.7554/eLife.50564)
Supplement: Figure 4—source data 1. [file elife-50564-fig4-data1.xlsx]

## Sheet: Figure 4 Spine
	Spine													Spine
		12h ANL, No PTZ			12h ANL, PTZ+					12h ANL, PTZ+, PSI+					12h ANL, No PTZ			12h ANL, PTZ+					12h ANL, PTZ+, PSI+
Larva #:	1	2	3	4	1	2	3	4	5	1	2	3											1	2	3			ANL 12 hrs Spine
	Intensity Mean	Intensity Mean	Intensity Mean	Intensity Mean	Intensity Mean	Intensity Mean	Intensity Mean	Intensity Mean	Intensity Mean	Intensity Mean	Intensity Mean	Intensity Mean		1	2	3	4	1	2	3	4	5						Image ROI	Image ROI
Fluoresence intensities in single cells	307.865	286.573	376.045	382.32	197.989	391.078	211.084	251.465	278.922	184.996	158.914	188.125	Mean for each larva:	204.38	270.717	216.131	272.037	274.167	376.623	245.68	305.229	225.124	115.7	116.307	101.33			267.867	302.378
	235.597	270.357	430.487	369.472	197.413	406.512	224.852	355.445	324.481	260.832	136.956	223.402																245.623	319.288
	339.062	239.321	428.895	403.202	157.24	353.647	235.716	422.75	272.483	164.219	142.749	140.478																223.625	285.976
	467.768	288.921	426.421	325.404	171.483	448.162	272.238	320.216	266.047	107.605	155.687	149.765																211.86	255.984
	225.786	223.152	350.329	317.361	173.545	423.879	267.72	258.333	188.739	134.828	128.958	148.674			PTZ-	PTZ+	PTZ+, PSI+											241.6	239.67
	280.545	305.255	312.516	270.985	161.253	372.857	331.028	274.942	288.302	200.531	206.677	151.442		average	240.816	285.365	111.112											217.707	346.962
	457.854	311.94	232.214	310.744	245.078	348.853	316.182	261.715	230.046	153.211	187.802	114.983		sem	17.8085	30.4358	4.89436											193.084	290.764
	280.624	239.892	302.96	311.854	196.632	383.533	274.773	241.563	232.237	132.912	176.552	73.5433	TTEST P (PTZ+ PSI-, PTZ+ PSI+)	0.00117588														223.833	228.943
	312.51	284.451	291.521	335.296	164.637	419.563	304.116	242.963	183.046	131.395	166.455	62.885	TTEST P (PTZ-, PTZ+)	0.103988														225.553	212.46
	290.708	363.293	299.766	385.148	153.963	260.524	285.986	252.77	232.325	159.849	148.913	101.725																217.054	278.765
	219.279	302.135	253.057	380.253	167.412	360.671	333.691	417.707	300.668	163.276	194.55	101.677																212.312	279.909
	257.386	211.031	315.084	332.179	155.298	429.805	289.09	313.167	169.077	194.238	205.787	165.267																169.812	229.488
	200.293	157.394	197.026	322.528	188.235	347.977	288.625	252.858	242.073	183.157	179.035	146.913																185.029	262.155
	322.658	341.841	419.476	332.753	212.847	380.117	304.283	272.003	218.167	116.344	129.187	122.61																184.462	282.654
	304.911	338.467	293.764	337.861	204.7	378.846	273.697	247.727	175.716	187.507	146.158	138.653																	353.822
	256.592	214.671	364.84	307.561	167.927	355.464	364.802	269.867	182.716	126.152	100.71	121.312																	220.982
	335.259	219.909	320.319	288.928	208.217	455.948	311.933	236.518	213.052	133.268	94.022	108.992													Image ROI				333.013
	182.515	209.959	325.625	276.668	360.319	449.58	328.317	343.955	222.754	118.637	158.212	195.307														PTZ+	PTZ-
	211.899	223.805	464.14	294.136	321.847	401.589	285.149	284.371	227.63	93.6542	115.368	145.479													ave	277.836	215.673
	262.542	259.135	367.13	229.888	421.309	398.339	263.235	294.413	161.916	44.3583	166.374	159.412													sem	19.5556	7.06307
	298.538	453.47	352.96	255.245	196.48	266.85	299.993	295.25	184.801	99.4064	159.658	115.102
	259.029	326.49	311.214	255.151	108.992	441.088	239.946	233.205	249.373	83.2838	196.419	209.962
	270.145	245.6	196.982	258.943	167.94	327.772	232.841	231.571	280.772	129.05	186.908	130.131
	325.606	326.76	191.169	266.862	137.542	384.906	270.882	229.976	303.071	145.45	113.33	210.537
	291.19	318.471	254.3	260.701	192.763	443.831	224.602	256.623	182.383	125.608	117.862	155.628
	386.127	276.498	241.261	290.617	298.22	365.411	216.723	214.908	196.269	85.2558	179.317	58.8959
	349.204	305.603	275.501	328.914	177.789	316.787	249.503	300.078	211.452	141.368	103.095	51.4129
	359.266	301.649	331.284	301.435	192.356	456.785	211.713	347.324	181.151	146.068	119.878	108.583
	204.722	344.53	329.836	337.6	188.493	390.598	244.692	250.367	196.195	93.1804	122.343	84.5459
	293.548	267.248	373.875	275.861	324.174	359.274	247.938	319.661	209.822	115.132	132.872	95.3614
	205.371	234.258	339.496	267.239	236.995	451.697	195.793	308.217	265.061	161.674	156.603	86.9107
	173.701	253.433	311.947	240.721	196.737	367.565	236.556	307.219	175.71	98.5839	138.865	86.0603
	214.96	227.52	315.748	245.461	172.619	302.556	229.967	269.454	177.662	113.865	146.45	97.3366
	255.128	298.559	308.074	232.691	138.931	495.316	198.025	419.572	194.385	107.211	120.867	69.6828
	379.429	207.713	207.738	264.486	192.964	387.873	156.269	280.767	184.576	101.636	119.702	100.13
	263.889	282.716	256.854	279.085	216.197	462.916	236.754	270.802	164.784	96.799	111.34	85.1645
	266.73	341.953	259.426	144.843	160.361	323.836	148.569	300.534	231.297	145.561	204.251	108.594
	229.902	339.058	323.461	205.484	186.44	358.349	241.538	244.839	192.114	81.8416	118.167	74.4244
	220.243	397.467	226.102	271.653	228.877	398.009	234.172	307.508	234.267	138.115	111.094	69.7541
	180.556	345.936	152.97	329.102	253.013	375.986	124.446	257.451	182.448	195.592	149.2	97.4011
	295.08	256.577	360.711	309.452	259.27	425.79	224.124	371.714	168.547	140.651	136.201	91.9357
	290.947	269.871	163.583	282.126	157.381	387.287	191.188	255.547	217.863	115.858	106.618	64.0623
	267.804	267.696	325.825	298.287	160.652	337.908	271.748	341.758	209.948	132.202	141.495	92.4382
	255.39	254.815	252.476	308.222	179.622	310.176	280.108	311.21	188.573	118.436	116.066	72.7618
	237.689	286.695	237.378	334.304	201.512	414.879	240.347	309.799	175.724	63.4899	100.476	89.8217
	413.39	303.438	113.974	309.416	136.357	366.295	296.32	341.364	183.497	63.7455	173.013	89.9458
	350.853	266.408	229.734	298.062	236.28	375.848	306.429	292.091	212.682	83.9314	98.3914	89.5771
	223.088	246.008	317.494	232.688	209.103	348.985	284.366	382.356	260.791	104.28	110.611	96.7302
	222.727	237.977	243.94	294.292	236.023	325.068	287.416	358.924	228.378	202.22	136.889	117.113
	250.536	220.403	233.166	219.807	288.671	332.982	366.505	264.11	231.271	104.345	118.188	36.2905
	345.348	298.124	258.955	297.781	211.862	432.541	307.089	269.625	230.188	111.219	64.7538	88.1922
	188.187	266.883	275.439	306.652	288.314	313.34	239.155	259.325	189.827	121.143	74.0532	86.3916
	285.447	295.031	281.87	299.456	283.45	369.818	279.335	268.651	221.128	118.244	111.491	109.218
	316.409	299.972	371.337	248.111	218.168	342.747	269.231	154.146	226.054	115.984	77.195	84.8376
	224.338	336.249	287.753	402.198	166.336	221.635	248.134	299.146	157.942	121.201	124.388	68.9012
	284.706	307.725	251.058	320.507	212.294	396.361	240.181	272.693	224.204	102.486	87.4512	71.614
	298.711	330.84	267.327	283.576	219.08	414.725	222.108	282.724	203.47	162.616	150.251	103.332
	412.874	246.489	192.375	305.267	162.874	407.964	271.692	301.131	167.344	130.126	103.233	89.7407
	289.383	270.562	191.597	309.088	172.291	415.733	260.217	302.718	194.056	96.8783	161.29	51.4369
	271.384	335.128	198.216	232.673	170.417	445.388	193.828	257.633	204.422	127.486	113.73	87.8489
	166.459	355.714	225.416	347.447	138.079	384.493	211.86	314.701	313.096	116.97	171.042	86.6906
	166.571	200.199	205.489	309.824	195.046	371.644	217.941	277.296	199.79	70.4119	188.076	72.1297
	174.446	162.482	283.273	287.049	222.602	447.145	234.53	357.71	256.54	89.2123	217.585	74.1609
	206.435	262.388	185.219	419.746	211.243	370.752	219.421	313.62	244.326	236.539	229.703	81.7654
	276.859	220.677	167.988	363.413	339.837	401.601	244.454	274.521	198.091	212.388	172.067	69.4349
	223.411	211.443	185.927	367.133	210.542	371.227	212.908	322.675	198.702	174.879	231.607	53.4731
	295.887	283.814	222.494	255.883	222.218	424.6	253.77	307.855	187.303	88.8012	230.217	63.0062
	234.083	247.918	184.449	344.496	241.482	422.117	214.48	292.13	211.775	133.417	178.855	59.5071
	196.063	257.698	261.501	286.93	267.652	369.585	274.473	269.656	206.068	141.444	206.4	87.3511
	170.461	282.122	249.503	288.519	222.655	396.828	281.02	240.483	188.125	130.843	74.4817	59.381
	210.731	290.457	243.172	266.928	202.688	294.353	258.517	243.065	207.596	161.307	121.959	81.2791
	413.273	279.63	181.59	347.433	210.359	273.223	220.058	253.253	250.068	136.359	165.004	72.5903
	213.98	251.974	184.048	203.911	175.365	340.475	226.087	362.561	189.089	116.784	125.313	95.8012
	221.029	276.293	161.958	240.543	168.587	348.42	201.689	304.049	236.008	98.3418	182.572	59.6503
	205.779	283.487	268.358	286.12	236.19	278.283	255.49	269.664	215.538	155.072	170.154	70.4566
	221.887	250.94	216.371	366.444	231.891	294.049	307.144	301.858	174.046	203.86	198.73	70.2755
	246.831	180.217	235.589	308.141	189.555	362.582	302.917	321.403	143.259	170.324	71.5089	65.786
	205.001	187.918	241.514	315.818	251.67	410.366	211.117	282.685	252.459	169.953	83.5273	82.698
	199.883	164.882	218.431	376.099	272.608	446.622	291.102	422.079	243.186	168.754	108.389	84.5053
	243.445	254.94	270.904	327.598	268.686	454.215	172.907	364.844	224.06	158.299	88.5705	28.8951
	279.198	198.191	211.709	323.854	224.582	448.675	218.926	381.893	248.617	163.634	123.091	40.3115
	231.229	233.024	125.91	355.034	240.475	383.12	198.862	285.721	188.193	124.28	102.364	97.6718
	230.927	277.084	136.188	235.518	205.967	449.556	229.817	359.844	229.821	221.801	122.744	39.3643
	202.132	212.302	155.162	251.203	356.042	342.971	189.955	299.229	270.081	150.304	135.746	117.199
	220.616	192.915	130.922	266.458	299.926	433.883	226.867	342.476	245.562	238.281	108.82	59.5506
	284.641	147.325	165.394	370.221	291.7	441.691	197.91	279.002	274.025	211.65	97.0388	105.704
	275.941	221.147	148.612	344.748	129.51	300.502	170.989	328.029	226.509	222.841	95.6064	56.7796
	270.635	233.651	136.23	312.326	132.959	327.833	161.42	326.971	222.59	141.6	151.263	92.2194
	228.653	245.919	152.478	280.293	102.551	312.565	219.76	393.83	274.686	192.477	146.311	71.0275
	306.103	291.029	213.064	320.6	126.689	365.232	208.439	336.266	247.123	199.943	108.922	96.3381
	249.726	238.216	207.094	308.144	116.73	357.32	181.92	380.496	231.803	201.593	150.468	65.1818
	175.188	241.825	187.227	254.974	136.081	244.817	190.146	373.506	209.487	184.793	83.7772	66.476
	276.292	308.085	173.366	289.165	159.973	349.758	157.424	304.615	233.258	134.16	149.941	71.8876
	260.572	314.895	170.633	372.623	200.576	433.288	212.606	304.343	246.547	131.311	99.4766	84.2155
	304.628	210.447	183.558	388.753	238.812	394.704	298.007	318.639	237.928	192.412	101.919	91.7751
	332.68	347.449	225.77	386.622	143.985	398.325	194.819	320.45	247.377	195.508	115.231	91.4962
	237.397	347.82	189.978	384.131	186.425	434.007	224.925	288.772	206.396	196.976	130.366	112.339
	329.091	263.885	179.781	288.324	148.046	415.406	277.337	395.297	253.068	239.979	104.691	91.3102
	250.113	280.771	149.975	322.975	191.629	389.076	328.666	329.422	230.781	220.29	124.395	45.8736
	278.36	377.207	141.61	246.579	125.321	481.182	305.31	356.128	275.574	231.859	151.665	117.982
	404.555		122.535	305.92	208.032	447.877	344.944	313.316	282.177	229.791	107.202	109.376
	232.844		166.226	328.094	159.71	385.137	349.656	364.649	272.009	110.63	105.659	103.237
	242.63		146.463	280.955	160.193	400.381	349.523	325.696	266.687	175.285	95.2455	113.907
	244.084		159.425	245.67	123.936	450.722	330.214	343.286	233.903	95.9437	124.192	182.011
	338.285		160.034	247.813	169.082	432.173	242.064	414.008	202.526	101.862	88.082	217.383
	313.692		155.075	281.495	158.025	499.728	277.607	388.942	301.015	197.621	77.8146	219.973
	328.026		198.505	351.33	170.451	412.696	254.144	331.261	238.676	123.445	116.213	163.26
	332.783		188.245	288.393	157.229	437.914	276.03	318.558	263.215	145.034	85.0644	189.123
	295.941		177.548	272.99	191.931	419.322	272.297	329.968	264.446	121.025	101.044	246.801
	189.124		146.645	258.616	117.295	379.686	216.713	309.326	260.918	115.921	203.034	101.057
	141.015		149.202	268.379	98.5847	359.729	277.943	334.81	192.644	85.3625	194.395	91.492
	151.636		190.49	374.481	97.174	285.483	249.439	283.635	364.461	84.9629	77.5586	72.8849
	125.42		195.858	255.408	168.034	374.359	276.902	218.724	312.401	63.5286	71.1125	99.9613
	72.7991		159.471	292.367	138.367	409.517	202.815	312.521	307.734	73.6677	115.49	58.0115
	146.208		211.999	208.843	123.083	375.616	233.919	364.187	193.947	68.5312	80.3953	107.991
	164.919		229.183	294.216	139.956	411.396	297.094	359.991	263.986	54.8637	115.235	105.781
	116.746		207.61	329.835	165.537	372.968	296.767	380.751	328.484	99.8647	91.8852
	131.671		209.762	246.324	157.993	375.662	322.563	334.531	251.315	63.9308	89.5863
	161.413		184.355	290.146	192.954	384.293	226.824	312.687	215.732	68.2112	114.152
	191.695		207.934	252.648	126.706	332.655	194.508	242.759	201.422	107.338	98.363
	180.516		187.556	245.992	134.763	332.157	192.166	233.569	265.259	110.521	130.041
	263.884		251.052	345.589	182.763	399.591	240.66	248.046	222.341	90.9398	131.012
	243.27		203.372	288.327	180.272	369.79	264.156	302.831	267	105.722	213.072
	447.731		154.45	270.824	205.904	329.771	243.519	307.799	263.353	146.856	138.583
	261.548		240.657	270.852	270.268	333.777	270.143	301.273	397.743	102.491	211.525
	373.789		193.829	253.484	235.242	290.651	225.54	241.129	321.929	131.164	171.375
	415.303		160.615	320.13	111.356	425.97	263.531	337.328	325.735	99.3919	79.9481
	201.77		166.304	264.413	139.301	369.002	293.494	312.24	346.901	94.0726	77.4809
	270.918		182.425	247.176	171.141	347.493	221.288	246.296	315.781	100.48	88.4797
	213.066		184.881	257.672	146.281	351.555	175.988	239.098	249.108	61.8959	86.6088
	266.432		166.691	214.699	162.544	374.531	239.742	284.26	262.708	102.245	110.694
	267.372		221.598	221.018	132.597	421.468	197.556	273.64	305.773	93.6976	65.8988
	221.097		179.396	244.506	161.397	341.196	214.544	234.949	196.692	126.949	77.1965
	222.678		176.712	244.042	131.099	384.516	237.043	334.442	223.573	152.98	88.0179
	194.919		243.65	273.97	147.992	328.522	246.172	235.469	344.518	135.059	118.989
	202.233		197.167	302.712	115.58	324.192	184.236	300.029	301.254	153.312	89.6392
	82.3533		170.337	261.351	136.829	355.064	243.42	340.511	222.96	113.032	89.9632
	205.435		202.784	266.523	110.645	316.893	223.312	341.087	281.246	101.072	90.9576
	219.385		232.311	286.222	111.44	320.316	221.372	307.659	379.497	149.558	100.399
	162.634		178.094	338.956	87.669	362.704	209.9	304.258	290.155	99.8648	122.324
	299.088		292.395	189.852	107.129	355.654	269.569	285.374	269.25	151.115	76.0796
	255.081		209.177	276.682	111.997	344.491	174.577	329.191	343.487	147.404	89.5
	217.069		181.008	271.224	90.3258	353.447	199.612	279.719	283.683	38.2464	71.3203
	184.28		159.948	229.44	177.94	239.637	264.612	270.876	269.54	65.4477	72.0604
	213.921		179.84	233.876	164.932	252.553	244.724	370.729	147.229	62.173	68.5692
	169.957		174.92	239.374	169.858	281.279	185.276	267.509	280.091	75.4903	97.3417
	236.777		220.499	182.735	136.242	347.417	178.08	345.541	228.579	73.7294	70.9028
	261.485		213.373	139.6	138.637	335.632	169.68	380.453	245.567	65.1191	118.316
	218.874		168.017	143.593	146.696	482.714	239.021	267.367	211.072	137.332	83.4458
	243.796		184.57	171.102	132.745	477.809	172.182	322.068	163.871	82.0647	89.8032
	187.817		215.48	195.283	166.84		205.865	235.076	153.404	157.638	95.4444
	307.487		182.438	127.403	327.121		184.203	240.018	216.132	183.74	111.032
	241.333		167.207	155.529	327.673		214.936	284.937	158.805	119.526	103.497
	170.67		147.389	241.18	278.979		217.556	231.322	158.505	126.479	96.5076
	211.156		177.884	306.757	215.831		237.043	261.388	145.946	145.179	81.3786
	224.441		133.526	191.826	92.7701		177.329	456.883	187.966	160.154	84.6484
	224.829		252.533	239.512	95.207		167.457	333.988	210.508	182.2	81.8508
	229.647		239.561	289.48	304.154		178.088	396.804	178.614	157.106	70.5455
	194.393		245.664	339.22	311.218		173.215	364.715	174.31	119.037	122.669
	185.367		201.945	295.734	286.956		168.386	256.461	150.416	150.907	106.958
	187.953		180.56	312.825	310.907		241.308	439.156	163.904	157.106	101.048
	260.169		153.992	290.032	330.917		262.231	343.905	225.19	126.081	71.376
	134.651		164.28	255.874	111.491		303.439	325.015	218.885	148.841	86.8785
	181.93		203.248	331.833	77.4359		267.39	402.809	208.215	51.6827	84.7673
	212.477		220.784	295.641	103.493		290.922	267.131	170.289	80.7429	97.2578
	321.414		183.058	296.639	136.637		246.892	295.961	182.815	88.3974	100.382
	251.707		216.463	309.485	124.333		267.48	200.655	258.259	88.0451	95.625
	390.057		265.712	263.081	132.777		184.314	233.547	194.753	79.4473	92.4045
	215.135		176.248	237.808	106.57		191.972	277.186	171.929	91.1848	121.651
	221.291		249.34	245.261	100.396		192.378	296.609	170.61	94.8291	82.2997
	366.585		185.815	256.99	140.377		177.183	340.347	142.522	81.9183	85.805
	341.765		180.645	289.004	115.362		274.056	365.174	130.867	152.983	127.938
	493.442		118.883	348.437	215.83		265.447	319.766	166.812	176.92	116.668
	308.957		176.609	232.54	156.273		276.564	354.914	157.541	164.562	114.972
	154.058		121.695	234.149	97.0276		217.889		251.701	159.155	95.4933
	266.56		100.727	189.693	330.488		241.035		277.477	102.593	99.4674
	272.388		224.58	207.018	146.001		316.726		252.836	91.7898	84.2221
	152.864		140.958	169.946	136.2		274.726		222.516	100.274	104.3
	175.187		315.585	171.481	129.402		295.798		191.673	160.92	155.133
	288.247		191.725	216.202	239.927		229.7		200.535	189.744	85.8424
	384.307		115.83	215.907	319.532		196.891		207.708	158.81	87.0464
	243.444		192.044	215.214	321.933		233.465		194.457	145.743	92.3108
	238.581		204.396	222.086	145.446		186.786		158.481	101.083	83.7738
	177.577		147.399	186.014	140.786		251.048		199.394	99.8324	89.0521
	237.032		116.257	233.748	351.127		244.825		313.017	179.885	99.3141
	197.654		230.382	198.122	267.586		186.005		175.948	112.236	93.8852
	218.99		261.848	193.528	135.71		262.96		199.628	145.28	85.2701
	248.754		218.975	128.818	115.018		313.272		160.16	149.113	105.696
	188.209		111.39	215.724	103.245		317.678		141.585	94.422	92.1421
	114.831		124.569	156.767	94.8233		262.664		144.83	109.959	111.385
	145.095		170.927	199.611	134.455		329.313		130.986	95.6888	81.4396
	136.981		111.933	179.779	103.151		220.237		197.28	66.9062	87.3057
	181.909		101.755	295.973	108.84		327.536		166.126	91.5564	78.232
	217.459		214.38	175.019	109.805		287.409		161.55	98.0696	95.1168
	158.725		160.555	184.272	110.35		314.516		168.602	84.1137	91.1591
	151.596		192.656	171.441	176.382		213.525		162.882	83.2317	96.3647
	173.255		163.97	126.621	133.251		201.112		189.237	80.3459	101.009
	179.456		147.324	143.012	124.735		211.515		190.954	74.585	106.843
	210.943		165.048	161.595	101.602		211.509		188.093	78.8818	103.953
	107.786		135.553	198.497	132.137		211.607		287.675	100.033	103.4
	160.631		135.474	193.668	125.517		200.516		325.669	113.178	76.0538
	157.254		149.415	173.146	446.257		223.82		212.6	119.703	104.82
	149.661		141.11	196.559	522.433		212.28		243.31	79.5513	101.769
	182.015		146	185.563	712.806		235.466			81.2317	93.249
	184.869		136.81	173.477	780.082		181.219			58.8868	87.2608
	170.652		202.838	177.185	359.087		197.811			68.1049	102.973
	174.533		197.573	228.926	498.923		224.218			70.4321	91.6606
	178.551			325.383	424.955		238.118			113.146	86.0356
	244.188			283.7	418.226		251.436			76.8057	91.1438
	213.313			197.641	309.445		221.912			77.9684	104.082
	169.185			210.761	473.781		218.569			100.309	120.024
	137.94			254.073	492.089		262.955			84.1656	109.258
	302.06			232.617	584.68		235.81			103.007	88.0856
	389.468			263.18	523.28		216.945			86.3577	112.194
	214.718			278.199	688.813		275.408			107.096	81.0657
	282.648			359.595	432.666		275.255			75.4937	106.883
	387.518			296.539	761.979		252.097			103.919	102.697
	274.394			247.435	536.439		272.621			100.161	105.963
	106.253			261.079	721.432		263.094			93.9783	108.752
	116.959			270.571	1404.31		263.872			65.1038	99.4753
	125.311			184.381	503.736		262.677			62.3252	101.321
	137.912			269.333	809.659		275.584			74.7103	104.482
	163.253			222.542	726.27		207.003			69.1223	92.1398
	143.916			279.753	562.001		201.641			66.2241	75.5772
	111.951			282.25	709.036		243.961			79.0034	79.7186
	109.824			324.437	681.602		348			76.5175	52.8688
	134.836			288.846	538.092		393.241			74.2458	73.6245
	190.917			154.296	735.379		324.689			68.5992	79.7865
	150.258			304.319	511.393		274.136			94.9177	69.5453
	152.807			231.37	773.509		265.709			77.1361	65.3851
	169.388			300.989	486.061		305.514			83.6856	78.9833
	197.576			253.748	304.071		289.107			94.1066	63.9727
	183.089			425.298	272.487		313.369			70.2151	68.9891
	182.045			335.934	338.218					77.9082	98.9316
	111.533			304.243	377.906					92.5996	100.861
	143.577			332.241	582.835					59.9857	128.982
	118.615			295.556	922.758					54.9927	107.825
	158.474			327.067	612.571					77.1886	89.7882
	169.093			270.577	343.698					82.7248	98.9124
	188.462			266	400.889					76.7891	103.882
	257.559			243.541	550.126					103.576	106.883
	193.425			340.942	371.954					112.549	101.387
	224.174			279.197	444.569					85.2243	98.9617
	256.735			194.431	855.247					76.3004	69.3048
	177.85			333.647	565.199					70.3541	66.0653
	152.791			239.847	586.648					91.9876	83.7309
	144.3			246.709	532.344					94.6966	136.503
	221.014			286.219	890.27					103.184	96.6643
	183.997				540.675					103.754	172.123
	251.194				180.832					91.7943	229.131
	88.6815				206.486					70.5878	195.047
	192.734				222.021					69.4168	224.128
	178.73				216.914					69.9573	210.989
	174.737				338.292					56.6475	120.573
	160.137				529.76					81.6552	152.005
	191.802				385.79					108.3	93.3905
	213.372				307.564					68.3161	101.797
	206.867				498.823					68.2137	92.7948
	173.789				535.525					78.2213
	308.02				571.396					69.5131
	225.127				508.822					70.5755
	191.239				346.065					86.4969
	161.445				362.19					92.5145
	222.418				270.046					70.3018
	148.399				412.592					48.1688
	225.283				279.832					61.0417
	176.63				502.282					75.7111
	256.66				752.421					94.108
	170.411				453.983					105.91
	311.784				236.156					79.3079
	229.137				184.27					66.9141
	157.23				210.185					79.7061
	193.413				228.689					84.1453
	183.331				277.168					105.186
	222.73				314.64					91.2123
	235.308				400.677					122.677
	183.556				336.384					113.575
	291.222				449.197					126.199
	149.953				446.624					132.428
	147.395				298.956					93.1096
	216.794				344.268					93.3639
	173.552				269.893					97.1961
	171.282				277.366					88.5761
	168.592				293.243					123.111
	156.485				229.678					98.7985
	137.644				282.459					122.265
	103.338				392.251					90
	152.65				234.474					102.614
	126.355				342.461					103.38
	105.929				690.896					89.314
	76.196				717.45					156.662
	152.768				361.415					146.128
	132.475				141.696					100.344
	143.815				364.897					45.001
	160.467				225.323					99.5118
	219.978				218.352					70.8627
	117.963				310.456					95.9351
	109.127				321.639					87.9684
	170.023				233.939					136.984
	170.938				408.647					132.79
	220.695				286.574					101.538
	176.464				217.428					136.78
	197.347				184.988
	158.7				268.47
	177.804				259.631
	122.045				490.72
	90.0064				232.49
	117.848				193.761
	108.503				210.394
	102.096				249.664
	133.642				203.979
	135.855				315.737
	120.268				365.538
	139.169				445.774
	99.7812				359.805
	182.867				346.339
	146.549				784.739
	183.242				106.47
	141.323				209.79
	113.607				158.967
	168.436				177.257
	85.0808				195.385
	117.049				143.347
	98.2344				158.021
	108.79				145.02
	89.4462				269.93
	97.1667				176.338
	81.4698				273.995
	84.5869				280.032
	97.9548				207.545
	99.5627				164.438
	109.613				312.452
	109.83
	137.597
	170.157
	143.075
	123.246
	149.979
	135.099
	144.766
	104.605
	124.75
	204.347
	228.648
	141.492
	128.174
	170.322
	277.853
	212.005
	239.899
	213.928
	175.087
	276.931
	273.502
	178.984
	180.722
	258.443
	211.844
	175.327
	195.623
	156.781
	81.2612
	133.12
	169.125
	126.802
	232.586
	115.351
	189.511
	165.959
	187.803
	137.63
	136.549
	138.84
	142.91
	188.644
	132.403
	103.534
	148.968
	151.46
	155.043
	185.27
	167.398
	182.205
	180.592
	187.828
	131.211
	135.122
	82.8646
	77.7948
	96.0841
	114.313
	77.9578
	153.349
	183.182
	176.7
	159.242
	159.976
	237.518
	97.7029
	154.709
	139.703
	124.671
	101.015
	266.236
	177.945
	152.994
	130.984
	125.049
	103.137
	146.493
	90.4702
	135.065
	98.4084
	135.152
	141.249
	113.736
	209.186
	223.626

## Sheet: Figure 4 Habenula
	12h ANL, PTZ-			12h ANL, PTZ+				12h ANL, PTZ+, PSI+					habenula
Larva #:	1	2	3	1	2	3	4	1	2	3			12h ANL, PTZ-			12h ANL, PTZ+				12h ANL, PTZ+, PSI+
	Intensity Mean	Intensity Mean	Intensity Mean	Intensity Mean	Intensity Mean	Intensity Mean	Intensity Mean	Intensity Mean	Intensity Mean	Intensity Mean			1	2	3	1	2	3	4	1	2	3
Fluoresence intensities in single cells	261.874	255.391	504.163	560.935	451.342	486.879	652.888	120.193	178.506	225.899		Mean for each larva:	350.416	192.021	432.556	513.344	365.152	528.526	665.558	154.199	195.313	176.966
	330.909	319.135	439.663	598.595	422.351	469.39	614.596	88.9794	145.362	162.776
	327.008	123.045	439.406	675.367	422.609	574.135	754.172	90.8431	204.179	105.386
	411.772	288.128	428.069	660.052	403.619	551.889	697.452	168.96	178.317	165.293
	305.151	139.398	490.492	578.196	377.31	497	452.326	206.871	202.125	182.116			12hrs ANL PTZ-	12 hrs ANL PTZ+
	364.512	192.183	430.67	474.888	333.267	532.67	622.913	169.591	58.0563	96.4112		ave	324.998	518.145
	335.568	180.992	443.124	589.062	460.505	600.385	475.8	236.93	135.314	118.169		sem	61.1326	11.8915
	313.336	200.197	567.985	517.477	331.59	465.068	544.872	211.039	232.6	262.761	TTEST P (PTZ+, PTZ+ PSI+) =	0.00495015
	283.987	138.52	434.682	561.479	312.595	417.728	499.553	223.126	189.259	128.774	TTEST P (PTZ-, PTZ+)=	0.0503091
	346.079	268.293	485.674	488.575	419.983	570.221	426.727	242.438	277.973	144.682
	294.592	181.097	398.333	738.766	428.782	438.714	547.073	211.645	224.075	119.357
	333.949	171.467	506.376	577.99	447.361	506.94	629.716	139.872	194.29	116.735
	343.377	308.244	455.254	415.66	531.96	553.435	812.507	194.062	172.292	244.72
	318.32	228.823	481.614	439.572	423.258	651.468	766.694	138.53	209.086	213.049
	312.264	134.427	334.785	585.065	154.322	579.836	717.805	158.603	164.007	194.206
	484.78	121.466	402.582	644.893	410.786	544.415	858.556	183.957	143.535	143.836
	300.782	142.021	411.719	467.356	217.293	550.355	811.404	170.721	133.704	208.482
	396.046	215.339	399.531	513.434	363.019	505.868	702.441	122.918	147.702	106.22
	402.515	258.475	395.85	560.829	316.628	503.498	749.53	142.609	168.613	253.833
	378.415	116.454	425.098	580.079	567.789	533.963	692.602	158.965	201.334	322.136
	275.911	182.765	443.36	497.822	519.064	507.096	564.522	135.07	159.639	321.821
	391.95	180.57	461.31	576.918	567.567	523.605	736.036	121.387	195.576	279.357
	266.613	116.69	544.367	392.452	411.369	628.737	719.819	107.101	240.318	245.008
	278.272	134.181	422.283	649.495	398.609	486.433	703.063	115.546	208.244	150.292
	335.491	189	323.803	570.005	387.073	552.429	802.4	205.227	254.7	47.5556
	321.508	206.257	459.04	414.617	394.657	498.617	657.048	173.414	222.426	42.2356
	456.71		421.028	645.092	388.168	487.415	700.723	143.768	213.639
	428.332		417.9	468.904	244.877	476.107	703.649	169.952	246.469
	395.546		456.268	606.44	257.284	433.344	532.097	158.128	245.873
	402.408		367.408	704.725	282.174	417.23	679.614	91.3446	191.569
	364.752		403.083	433.543	265.756	451.474	591.669	78.3911	206.251
	343.43		414.828	369.389	492.031	563.055	617.784	78.3881	220.911
	352.453		370.836	517.229	379.754	495.423	669.923	118.267	217.823
	431.266		506.842	525.051	321.007	557.247	710.873	103.425	202.735
	469.164		372.049	389.879	396.576	492.23	630.864	107.168	226.928
	439.69		345.516	394.742	298.213	414.993	620.876	97.2505	160.504
	258.733		477.582	424.981	304.002	506.198	559.587	131.894	176.715
	318.053		359.485	494.775	336.013	538.636	582.625	164.863	158.942
	319.26		427.624	410.244	314.49	552.241	606.267	185.636	178.36
	302.027			449.183	211.579	647.262	681.284	241.854	187.04
	290.445			466.895	267.123	700.989	611.609	199.054	195.957
	425.266			404.031	224.475	557.964	616.934	167.112	151.655
	319.947			465.191	274.693	630.418	765.952	214.341	265.634
	456.129			474.831	307.279	625.795	647.666	95.3251	302.95
	243.747			455.909	330.183	494.976	604.124		227.197
	235.438			428.845	303.482	589.431	733.275		215.613
	517.449			400.753	297.895	477.517	691.191		198.238
	365.783			380.308	320.164		673.214		184.884
	399.178				455.119		657.843		164.891
	324.662				460.054		622.967		177.796
	296.351				294.91		613.206		294.451
					286.371		695.9		169.894
					537.636		753.395		148.37
					426.607		958.234		266.79
					333.38		682.045		256.822
					402.705		736.875		234.336
					253.099		477.143		219
					317.93		791.034		130.101
					484.221		639.453		60.5263
							694.649		176.088
							745.905		216.576
							668.455		206.247
							748.754		145.522
									215.534
